# Supplementary material for: Co-occurring KRAS mutation/LKB1 loss in non-small cell lung cancer cells results in enhanced metabolic activity susceptible to caloric restriction: an in vitro integrated multilevel approach
Source: J Exp Clin Cancer Res. 2018 Dec 4;37:302. doi: 10.1186/s13046-018-0954-5 (PMC6280460; doi:10.1186/s13046-018-0954-5)
Supplement: Supplementary file 1 — Table S1. Metabolic enzymes and related pathways analysed by SRM. (XLSX 12 kb) [file 13046_2018_954_MOESM1_ESM.xlsx]

## Sheet: Foglio1
Metabolic pathway	Gene name	Protein name
Glycolysis	PGM1	Phosphoglucomutase-1
	TALDO	Transaldolase
	ALDOA	Fructose-bisphosphate aldolase A
	GAPDH	Glyceraldehyde-3-phosphate dehydrogenase
	PGK1	Phosphoglycerate kinase 1
	PGAM1	Phosphoglycerate mutase 1
	PKM	Pyruvate kinase PKM
	LDHA	L-lactate dehydrogenase A chain
TCA	PDHA1	Pyruvate dehydrogenase E1 component subunit alpha, somatic form, mitochondrial
	PDHB	Pyruvate dehydrogenase E1 component subunit beta, mitochondrial
	MDH2	Malate dehydrogenase, mitochondrial
	SUGL1	Succinyl-CoA ligase [ADP/GDP-forming] subunit alpha, mitochondrial
	IDH2	Isocitrate dehydrogenase [NADP], mitochondrial
Glutaminolysis	GOT2	Aspartate aminotransferase, mitochondrial
	GOT1	Aspartate aminotransferase, cytoplasmic
	GLUD1	Glutamate dehydrogenase 1, mitochondrial
	GLS1	Glutaminase kidney isoform, mitochondrial
	GLS2	Glutaminase liver isoform, mitochondrial
	GLUL	Glutamine synthetase
Urea cycle	ASL	Argininosuccinate lyase
	ARG1	Arginase-1
	OTC	Ornithine carbamoyltransferase, mitochondrial
Glutathione metabolism	GCLC	Glutamate--cysteine ligase catalytic subunit
	GSS	Glutathione synthetase
	GSR	Glutathione reductase, mitochondrial
Tryptophan degradation	IDO2	Indoleamine 2,3-dioxygenase 2
	KYNU	Kynureninase
Amino acid degradation	PAH	Phenylalanine-4-hydroxylase
	BCAT1	Branched-chain-amino-acid aminotransferase, cytosolic
	AACA1	3-ketoacyl-CoA thiolase, peroxisomal
	AUH	Methylglutaconyl-CoA hydratase, mitochondrial
	GCDH	Glutaryl-CoA dehydrogenase, mitochondrial
	ODC1	Ornithine decarboxylase
Purine metabolism	FTCD	Formimidoyltransferase-cyclodeaminase
	CSAD	Cysteine sulfinic acid decarboxylase
	ADSL	Adenylosuccinate lyase
	GMPS	GMP synthase [glutamine-hydrolyzing]
	ATIC	Bifunctional purine biosynthesis protein PURH
Fatty acid transport and oxidation	ACADV	Very long-chain specific acyl-CoA dehydrogenase, mitochondrial
	ACSL1	Long-chain-fatty-acid--CoA ligase 1
	HADH	Hydroxyacyl-coenzyme A dehydrogenase, mitochondrial
	FASN	Fatty acid synthase
Lipid metabolism	SCD5	Stearoyl-CoA desaturase 5
	ALOX5	Arachidonate 5-lipoxygenase
	PGS1	CDP-diacylglycerol--glycerol-3-phosphate 3-phosphatidyltransferase, mitochondrial
	PISD	Phosphatidylserine decarboxylase proenzyme, mitochondrial
	SGSM1	Phosphatidylcholine:ceramide cholinephosphotransferase 1
