# Supplementary material for: Co-occurring KRAS mutation/LKB1 loss in non-small cell lung cancer cells results in enhanced metabolic activity susceptible to caloric restriction: an in vitro integrated multilevel approach
Source: J Exp Clin Cancer Res. 2018 Dec 4;37:302. doi: 10.1186/s13046-018-0954-5 (PMC6280460; doi:10.1186/s13046-018-0954-5)
Supplement: Supplementary file 3 — Table S3. SRM peptides abundance. (XLSX 19 kb) [file 13046_2018_954_MOESM3_ESM.xlsx]

## Sheet: Foglio2
gene name	WT_R1	WT_R2	WT_R3	K_R1	K_R2	K_R3	S_1	S_2	S_3	KS_R1	KS_R2	KS_R3
PDHB	1.67431	2.88268	7.00715	6.13476	4.44296	9.34695	4.50291	5.35307	8.60245	3.44331	4.56738	14.0421
PGM1	2.08581	3.70679	6.49122	2.4071	2.43014	8.83313	1.19433	1.16879	8.01287	8.18104	5.53654	9.95225
TALDO1	1.23049	1.86544	2.54714	5.22979	4.82618	4.25121	5.35267	7.23944	4.36578	6.01366	6.79219	6.28601
ALDOA	2.82253	4.35709	3.76392	10.9852	8.90763	13.6005	16.6254	16.09	10.8276	16.3844	23.3494	16.2863
GAPDH	2.30607	2.89956	3.28665	11.6169	10.0055	14.2513	8.84448	9.69688	11.6078	10.5324	13.8127	22.1397
PGK1	5.11313	3.01172	4.62922	10.9044	8.93991	9.11099	9.39409	9.5367	11.3347	8.18104	5.53654	9.95225
PKM	2.40158	3.42755	4.38298	13.2397	14.8018	12.749	15.0089	15.132	12.9832	19.3945	20.5903	18.8885
LDHA	2.83915	3.88033	4.69989	10.5622	7.58531	13.9381	15.9132	16.6303	17.0208	13.5162	12.3782	14.0364
PDHA1	1.77042	1.44504	2.1183	1.64454	1.49192	2.60504	2.27303	2.38529	2.15486	2.03772	1.81439	1.45945
MDH2	3.6601	3.79096	11.4877	1.36504	1.41019	2.94766	11.0826	6.68827	6.94372	2.14028	3.82644	3.65703
SUCLG1	1.27458	1.13151	2.08094	2.28198	1.92512	2.40869	2.23797	2.50574	2.93122	1.60117	1.68154	2.53954
PGAM1	1.70512	1.25633	2.39815	5.60553	3.08962	4.96368	6.31574	5.52433	6.41516	3.75514	5.35242	5.61877
IDH2	3.69215	5.9671	4.93106	8.10925	9.82244	7.58513	5.31207	6.84644	8.84172	3.56486	5.16529	7.16249
GOT2	2.21826	3.39513	7.87934	3.91455	4.93193	5.09715	4.26217	6.94726	7.9193	4.98713	7.03065	6.41713
GOT1	1.76065	2.43726	2.9995	5.13278	4.27635	6.53443	10.6158	13.5013	12.3925	10.0237	20.9206	8.40512
GLUD1	3.65087	7.10377	16.1928	8.04634	7.29797	10.2073	8.58399	8.35403	13.3229	7.92786	9.01151	15.3006
GLS	1.47919	2.68232	2.57236	6.03219	5.22569	7.67354	7.32911	5.64594	5.77558	7.18585	9.11468	10.2835
GLS2	1.26408	1.69422	4.0334	3.31296	2.69336	4.93307	1.10726	0.121926	5.24564	4.47325	8.0755	5.04534
GLUL	1.13985	2.11866	3.30674	6.02742	5.1046	6.29021	3.78357	3.80091	3.59639	2.4265	2.89935	3.5058
OTC	1.75242	1.33873	2.34608	4.71764	3.84561	5.45799	3.3195	4.62284	4.58866	2.841	4.78748	7.38205
ASL	0.863717	0.957892	1.27609	2.94298	2.43317	2.50146	1.47619	2.03918	3.61315	1.30806	1.11974	3.16837
ARG1	4.74922	5.1249	5.68198	7.31104	5.19922	9.13289	3.90142	1.57214	7.95287	3.5242	6.30359	7.5465
GCLC	0.851486	1.37267	3.56778	3.14787	2.80004	4.77554	3.49598	2.99941	4.225	3.06915	4.43217	9.26291
GSS	1.66968	3.58074	5.88109	6.11006	5.88668	6.54751	1.96558	2.22742	5.62096	3.15554	5.44213	7.9126
GSR	0.514189	0.704386	0.889802	3.15235	2.68395	4.20323	1.09356	2.07158	2.01653	0.813804	1.32418	4.53243
IDO2	2.12024	3.28834	3.33971	4.72384	3.95449	5.86594	6.1125	5.30373	5.38431	5.90953	6.54477	6.45259
KYNU	0.639997	1.31122	1.30535	2.84001	2.93343	2.16855	2.53732	2.31343	2.15531	1.92689	1.80464	1.76385
PAH	4.84754	4.29175	9.12218	8.84364	7.35927	9.49774	8.78626	10.6349	10.4975	7.63794	5.85949	8.62175
BCAT1	1.68764	3.12472	5.65131	4.65708	5.6038	9.30658	5.38602	6.88257	7.84402	4.57617	7.63501	9.64509
ACAA1	2.45698	3.06391	6.58057	2.72439	2.41308	4.91785	4.96273	5.07595	3.96488	3.58714	2.64683	3.60569
AUH	0.617473	0.734731	0.712201	3.94414	2.65789	2.48616	1.59007	2.65322	2.43249	1.07505	2.33296	2.76361
GCDH	2.28394	4.6596	9.29992	5.80222	6.94298	7.75746	4.37466	6.00759	12.8219	8.33098	10.0403	10.6785
ODC1	0.904154	1.30355	1.95506	1.81481	1.81606	3.92144	1.49963	1.981	1.40522	0.83256	1.20004	1.36646
FTCD	1.80023	2.38652	2.48022	3.95486	4.12314	4.55569	3.12244	4.26684	4.33452	6.77945	3.50515	5.69094
CSAD	2.71472	2.32858	2.68476	1.95353	2.01667	2.84825	0.851346	0.681026	2.81208	1.62454	1.5183	1.96621
ADSL	2.9971	2.63361	4.53052	4.32802	3.22109	6.6727	2.92541	3.06381	5.16744	3.01418	2.85059	4.59552
GMPS	1.276	1.60779	1.5809	4.81491	4.0829	5.95219	4.92204	5.608	5.45173	2.85933	3.61985	5.22436
ATIC	2.58809	3.14593	5.32127	8.79831	5.75261	9.12633	11.9197	9.37219	12.5095	12.3756	11.0861	10.0044
ACADVL	4.75371	4.65914	10.3561	6.221	6.54257	8.90795	8.47951	9.58365	16.1902	9.86267	10.1831	20.2605
ACSL1	1.79048	2.59009	5.74715	5.37354	5.12749	7.84121	2.33118	1.53292	7.74294	3.86398	4.92034	6.13869
HADH	1.32646	1.52427	4.76424	2.91594	1.5401	1.93474	1.49022	0.858921	1.21394	2.82871	1.52355	1.17892
FASN	1.46087	1.82488	3.26005	4.68917	4.72322	5.90623	3.86864	7.57842	6.41555	5.08211	5.59001	7.60086
SCD5	1.0743	1.00137	0.962029	1.24498	1.14215	2.45919	1.72054	2.72043	2.88279	2.33948	3.51535	2.93739
ALOX5	1.84081	2.65034	2.20461	4.23609	3.14711	5.11867	3.7559	4.06868	7.4941	2.77665	5.21029	5.49675
PGS1	3.48959	4.70416	7.63307	5.61958	5.36286	6.24815	5.6904	5.73824	6.0683	6.19459	7.63979	7.61126
PISD	2.41676	2.35469	4.73451	1.41166	1.4267	2.39652	3.95691	3.74824	5.63136	4.99757	5.22531	4.69976
SGMS1	2.80327	2.23347	8.69567	1.28109	1.15692	2.80724	2.68906	1.5713	3.87596	2.76809	2.26436	3.85357
