# Supplementary material for: Co-occurring KRAS mutation/LKB1 loss in non-small cell lung cancer cells results in enhanced metabolic activity susceptible to caloric restriction: an in vitro integrated multilevel approach
Source: J Exp Clin Cancer Res. 2018 Dec 4;37:302. doi: 10.1186/s13046-018-0954-5 (PMC6280460; doi:10.1186/s13046-018-0954-5)
Supplement: Supplementary file 5 — Table S4. Protein list identified by label-free proteomics. (XLSX 176 kb) [file 13046_2018_954_MOESM5_ESM.xlsx]

## Sheet: legend
Intensity: log2 peak intensity of each proteins in each experimental group
Peptides: The total number of peptide sequences associated with the protein group (i.e. for all the proteins in the group).
Razor + unique peptides: The total number of razor + unique peptides associated with the protein group (i.e. these peptides are shared with another protein group).
Unique peptides: The total number of unique peptides associated with the protein group (i.e. these peptides are not shared with another protein group).
Sequence coverage [%]: Percentage of the sequence that is covered by the identified peptides of the best protein sequence contained in the group.
Unique + razor sequence coverage [%]: Percentage of the sequence that is covered by the identified unique and razor peptides of the best protein sequence contained in the group.
Unique sequence coverage [%]: Percentage of the sequence that is covered by the identified unique peptides of the best protein sequence contained in the group.
Mol. weight [kDa]: Molecular weight of the leading protein sequence contained in the protein group.
Score: Protein score which is derived from peptide posterior error probabilities.
Protein Ids: A unique (consecutive) identifier for each row in the proteinGroups table, which is used to cross-link the information in this file with the information stored in the other files.
Protein names: Descriptions of the proteins the identified peptide is associated with.
Gene names: Names of genes the identified peptide is associated with.

## Sheet: 832 proteins
Intensity K_R1	Intensity K_R2	Intensity K_R3	Intensity KS_R1	Intensity KS_R2	Intensity KS_R3	Intensity WT_R1	Intensity WT_R2	Intensity WT_R3	Intensity S_R1	Intensity S_R2	Intensity S_R3	KEGG name	Peptides	Razor + unique peptides	Unique peptides	Sequence coverage [%]	Unique + razor sequence coverage [%]	Unique sequence coverage [%]	Mol. weight [kDa]	Score	Protein IDs	Protein names	Gene names
NaN	NaN	NaN	NaN	20.8524	20.8074	NaN	NaN	NaN	NaN	20.7603	NaN		1	1	1	10.7	10.7	10.7	14.45	4.7727	A0A024QZ42;O75340	Programmed cell death protein 6	PDCD6
21.7223	22.0005	NaN	21.0149	17.8815	NaN	20.1353	20.4998	NaN	19.3362	NaN	21.2346	Bladder cancer;Cell cycle;Chronic myeloid leukemia;Gap junction;Glioma;Measles;Melanoma;Non-small cell lung cancer;Oocyte meiosis;p53 signaling pathway;Pancreatic cancer;Pathways in cancer;Progesterone-mediated oocyte maturation;Prostate cancer;Small cell lung cancer;T cell receptor signaling pathway;Tight junction	6	6	5	24.9	24.9	22.2	34.081	12.412	A0A024QZP7;P06493;A0A087WZZ9;E5RIU6;K7ELV5;E7ESI2;G3V5T9;P24941;Q00526;G3V317;F8VXD2;F8VYH9;F8VZZ0;F8VTV8;F8VWX7;F8VZ51;K7EJ83;H0YAZ9;Q9BVE2;E7EUK8;E5RGN0;A0A087X209;A0A087WZU2;F5H6Z0;J3QSD7;P11802;Q00534;P50750;Q96Q40;O94921;Q07002;Q00536;Q00537;Q9NYV4;Q14004	Cyclin-dependent kinase 1	CDC2;CDK1
21.821	21.7871	NaN	22.5403	NaN	NaN	NaN	23.3232	22.3826	20.5991	NaN	19.4012	Ribosome	7	7	7	26.3	26.3	26.3	22.591	11.547	A0A024R4M0;P46781;B5MCT8;C9JM19;F2Z3C0;A8MXK4	40S ribosomal protein S9	RPS9
21.9062	NaN	21.2857	20.7509	NaN	21.6414	NaN	NaN	NaN	19.5737	17.6696	22.3051	Proteasome	1	1	1	11.6	11.6	11.6	18.607	11.579	C9JCK5;A0A024RA52;P25787	Proteasome subunit alpha type;Proteasome subunit alpha type-2	PSMA2
23.1141	23.4344	23.8872	20.198	21.5006	22.559	20.5531	21.303	21.0173	NaN	22.9419	17.239	Pyrimidine metabolism;Selenocompound metabolism	6	6	6	20.1	20.1	20.1	53.166	19.007	E9PIR7;F8W809;A0A087WSW9;E9PNQ6;A0A087WSY9;Q16881;E2QRB9;E9PKD3;E9PLT3;E9PKI4;A0A0B4J225;E9PIZ5;E9PRI8;E9PQI3;A0A096LPD9;E7EWK1;A0A096LPK7;E7ENA2;D3YTF8;D3YTF9;Q9NNW7	Thioredoxin reductase 1, cytoplasmic	TXNRD1
NaN	NaN	NaN	NaN	NaN	19.8237	18.9082	19.6195	19.8233	NaN	NaN	NaN	Biosynthesis of unsaturated fatty acids	1	1	1	7.1	7.1	7.1	43.733	5.9015	G3V4F2;A0A087X0W7;A0A087WT95;Q86TX2;P49753	Acyl-coenzyme A thioesterase 1;Acyl-coenzyme A thioesterase 2, mitochondrial	ACOT1;ACOT2
17.2557	22.1917	22.0317	18.8694	21.891	NaN	21.8221	22.0093	21.5621	20.4673	23.196	22.2093		10	10	9	18.6	18.6	16.6	73.027	28.827	A0A087WTP3;Q92945;M0QYH3;M0R0I5;M0QXW7;M0R3J3;M0R251;M0QYG1;M0R263;M0R0C6	Far upstream element-binding protein 2	KHSRP
22.4931	22.8901	23.0797	23.017	22.6997	NaN	22.7321	22.6216	23.3737	22.2139	21.8281	21.0525	mRNA surveillance pathway;RNA degradation;RNA transport	13	13	7	32	32	15.5	58.535	36.509	A0A087WTT1;P11940;E7EQV3;E7ERJ7;H0YBN4;H0YAR2;Q9H361;E5RGH3;E5RH24;E5RJB9;Q4VXU2;H0YAP2;H0YB86;E5RHG7;H0YAS7;H0YAS6;H0YB75;H0YEU6;H0YC10;E5RGC4;E5RFD8;H0YEQ8;H0YCC8;Q5JQF8;Q96DU9	Polyadenylate-binding protein;Polyadenylate-binding protein 1	PABPC1
NaN	NaN	21.5018	16.4756	18.4628	19.2999	NaN	NaN	NaN	NaN	18.4936	19.3088		2	2	2	11.8	11.8	11.8	27.015	2.7013	A0A087WTZ5;E9PJ81;E9PRQ7;Q04323	UBX domain-containing protein 1	UBXN1
NaN	NaN	NaN	NaN	NaN	NaN	NaN	20.0643	20.7615	19.0951	NaN	NaN		1	1	1	14.5	14.5	14.5	9.369	3.1463	A0A087WUD3;Q9NRP0	Oligosaccharyltransferase complex subunit OSTC	OSTC
23.7078	20.8598	23.6403	NaN	20.1131	18.9896	NaN	19.5525	NaN	NaN	23.4242	23.638		4	4	2	40	40	31.8	12.217	10.028	A0A087WUD6;Q13068;P0CL82;P0CL81;P0CL80;O76087;Q13065	G antigen 4;G antigen 12I;G antigen 12G;G antigen 12F;G antigen 7;G antigen 1	GAGE2E;GAGE4;GAGE12I;GAGE12G;GAGE12F;GAGE7;GAGE1
NaN	NaN	NaN	NaN	20.7812	20.1273	20.4468	NaN	NaN	20.3986	NaN	NaN		4	3	3	8	5.8	5.8	40.04	7.5193	A0A087WUK2;O14979	Heterogeneous nuclear ribonucleoprotein D-like	HNRNPDL
20.9232	NaN	NaN	20.2493	NaN	NaN	NaN	NaN	NaN	NaN	19.8692	20.3936	Proteasome	2	2	2	23.4	23.4	23.4	16.161	4.459	A0A087WUL2;P49720;A0A087WXQ8;A0A087WY10	Proteasome subunit beta type-3	PSMB3
20.1092	20.4928	18.1335	NaN	16.9715	NaN	NaN	NaN	NaN	NaN	NaN	NaN	Proteasome	4	4	4	11.4	11.4	11.4	42.739	5.5616	A0A087WUL9;Q9UNM6;J3KNQ3;H0YD73;E9PL38	26S proteasome non-ATPase regulatory subunit 13	PSMD13
NaN	NaN	NaN	21.859	NaN	NaN	NaN	20.3319	18.8961	22.8817	NaN	NaN		4	4	4	55.4	55.4	55.4	10.353	12.767	A0A087WUN7;H0YJ40;G3V4X6;G3V2S9;Q9GZT3;H0YJW7;H0YJI1	SRA stem-loop-interacting RNA-binding protein, mitochondrial	SLIRP
22.2834	22.7935	NaN	20.7494	21.2138	22.791	20.9357	21.9873	22.508	NaN	19.7186	22.0892	Ribosome	3	3	3	29.8	29.8	29.8	15.197	14.58	E7ETK0;A0A087WUS0;P62847	40S ribosomal protein S24	RPS24
NaN	NaN	16.7914	NaN	NaN	NaN	NaN	16.3738	16.0652	20.7143	17.2654	NaN		2	2	2	27.4	27.4	27.4	9.3354	3.8643	R4GMX5;I3L192;A0A087WUV8;A0A087X2B5;P35613;R4GN83	Basigin	BSG
NaN	18.8978	21.5276	19.1765	20.2391	18.8933	NaN	19.4272	NaN	NaN	20.57	20.2222		4	4	4	2.4	2.4	2.4	274.83	22.464	A0A087WUZ3;Q01082;F8W6C1	Spectrin beta chain, non-erythrocytic 1	SPTBN1
20.8009	21.1985	22.2744	NaN	22.1966	NaN	NaN	NaN	NaN	NaN	NaN	NaN		1	1	1	14.6	14.6	14.6	23.786	9.3328	A0A087WV23;Q9H299	SH3 domain-binding glutamic acid-rich-like protein 3	SH3BGRL3
NaN	NaN	NaN	NaN	NaN	NaN	NaN	20.4062	19.9811	20.6872	NaN	NaN	One carbon pool by folate	5	5	5	7.3	7.3	7.3	99.31	7.462	A0A087WVM4;B7ZM99;Q6UB35;Q4VXM1;Q4VXM0	Monofunctional C1-tetrahydrofolate synthase, mitochondrial	MTHFD1L
25.0033	25.928	25.7169	24.6838	24.9431	25.3105	23.8986	25.2859	24.805	22.4043	24.6949	25.3001	Bacterial invasion of epithelial cells;Endocrine and other factor-regulated calcium reabsorption;Endocytosis;Huntington's disease;Lysosome	42	42	35	39.6	39.6	34.5	192.06	276.32	A0A087WVQ6;Q00610;J3KS13;K7EJJ5;J3KRF5;J3KSQ2;J3QL20;F5H5N6	Clathrin heavy chain;Clathrin heavy chain 1	CLTC
NaN	NaN	NaN	NaN	NaN	NaN	NaN	NaN	NaN	NaN	17.9502	21.3203	Colorectal cancer;Mismatch repair;Pathways in cancer	2	2	2	3.7	3.7	3.7	121.12	8.8454	A0A087WWJ1;P52701	DNA mismatch repair protein Msh6	MSH6
20.3236	NaN	21.0984	NaN	NaN	20.078	NaN	NaN	20.2145	19.5614	NaN	NaN	Ribosome biogenesis in eukaryotes	2	2	2	15.7	15.7	15.7	23.79	3.7454	V9GYP5;A0A087WWQ2;Q92979	Ribosomal RNA small subunit methyltransferase NEP1	EMG1
23.0487	23.0346	22.8903	25.5259	22.191	22.9481	21.0878	22.3119	20.8505	23.1778	22.1175	22.2238	Cardiac muscle contraction;Dilated cardiomyopathy;Hypertrophic cardiomyopathy (HCM);Pathways in cancer;Thyroid cancer	14	14	0	51.5	51.5	0	26.42	38.988	A0A087WWU8;D6R904;H0YL80;K7EP68;D6RFM2		TPM3
NaN	20.219	NaN	NaN	NaN	NaN	16.6949	18.4026	17.7816	NaN	19.0606	NaN	Alzheimer's disease;Huntington's disease;Oxidative phosphorylation;Parkinson's disease	2	2	2	7.3	7.3	7.3	40.836	5.6331	A0A087WXC5;E7ESZ7;O95299;Q8N1B9;C9J6X0	NADH dehydrogenase [ubiquinone] 1 alpha subcomplex subunit 10, mitochondrial	NDUFA10
21.743	NaN	21.5288	22.4727	20.0794	NaN	NaN	NaN	NaN	22.1527	21.8114	NaN	Arrhythmogenic right ventricular cardiomyopathy (ARVC);Dilated cardiomyopathy;ECM-receptor interaction;Focal adhesion;Hypertrophic cardiomyopathy (HCM);Regulation of actin cytoskeleton	1	1	1	1.3	1.3	1.3	75.849	2.9672	A0A087WXP3;E9PEE8;P18564	Integrin beta;Integrin beta-6	ITGB6
NaN	NaN	NaN	NaN	NaN	NaN	NaN	NaN	NaN	17.1174	18.6837	NaN		1	1	1	1.7	1.7	1.7	107.3	2.8956	H0YFY6;A0A087WY61;Q14980	Nuclear mitotic apparatus protein 1	NUMA1
NaN	NaN	NaN	17.7577	21.7364	NaN	NaN	NaN	NaN	NaN	NaN	NaN	Protein processing in endoplasmic reticulum;Ubiquitin mediated proteolysis	3	3	3	54.1	54.1	54.1	11.065	6.5664	D6RFM0;D6RAH7;H9KV45;A0A0A0MQU3;A0A087WY85;P62837;P61077;D6RAW0;D6RA11;A0A087WW00;C9J9H9;Q9Y2X8;P51668	Ubiquitin-conjugating enzyme E2 D2;Ubiquitin-conjugating enzyme E2 D3	UBE2D2;UBE2D3
20.6077	20.9824	20.5349	NaN	NaN	NaN	21.6544	22.834	23.149	19.6892	21.1738	NaN	Amyotrophic lateral sclerosis (ALS)	8	7	7	19	17.1	17.1	55.064	40.35	A0A087WYG8;Q16352;E7EMV2;E7ESP9;P07196;P07197;P12036	Alpha-internexin	INA
20.3278	21.1904	21.219	19.8287	19.3974	NaN	NaN	NaN	20.9671	NaN	19.731	NaN		3	3	3	24.3	24.3	24.3	23.764	8.6901	A0A087WYR3;O43399;A0A087WZ51	Tumor protein D54	TPD52L2
24.2553	24.0134	24.4515	23.0918	15.4526	NaN	NaN	21.1683	22.1096	22.0061	15.9455	NaN		5	5	5	34.8	34.8	34.8	19.155	13.181	A0A087WYT3;Q15185;B4DDC6	Prostaglandin E synthase 3	PTGES3
NaN	NaN	NaN	18.8667	NaN	20.0118	NaN	NaN	NaN	NaN	NaN	NaN		2	2	2	29.2	29.2	29.2	9.8624	2.5504	J3QQN6;J3QR27;J3QLU1;J3QKQ0;J3QRD0;J3QL02;J3KSV5;A0A087WYZ1;J3QKT2;Q96KP4;J3KSS4;J3KRD5;J3QRP4;A0A087WVS2;J3QRA8	Cytosolic non-specific dipeptidase	CNDP2
NaN	18.3114	18.9381	NaN	NaN	NaN	NaN	17.669	17.641	NaN	NaN	20.9856	Measles;RNA transport	2	2	2	8.6	8.6	8.6	39.589	2.6344	A0A087WZK9;B3KS98;O15372;E5RJT0	Eukaryotic translation initiation factor 3 subunit H	EIF3H
23.2345	23.4877	22.5632	23.0703	22.6727	22.5773	20.8016	23.1578	22.8862	23.1583	21.3866	22.3373		7	7	7	25	25	25	30.302	29.855	D6R9P3;D6RD18;D6RBZ0;A0A087WZV1;Q99729	Heterogeneous nuclear ribonucleoprotein A/B	HNRNPAB
NaN	NaN	NaN	NaN	NaN	NaN	NaN	NaN	20.222	20.9324	19.3889	NaN	Protein processing in endoplasmic reticulum	4	4	4	5.4	5.4	5.4	104.78	5.9151	A0A087X054;Q9Y4L1;E9PJ21;A0A087WWI4;K7EQK2	Hypoxia up-regulated protein 1	HYOU1
NaN	NaN	NaN	17.4473	18.6558	NaN	19.2528	NaN	NaN	16.9043	17.4162	NaN	Colorectal cancer;Mismatch repair;Pathways in cancer	2	2	2	5.8	5.8	5.8	54.777	7.5855	A0A087X1E7;A0A087X078;V9H019;E9PHA6;P43246;V9H0B2	DNA mismatch repair protein Msh2	MSH2
21.2141	22.3837	22.4877	21.185	19.9401	20.3667	19.3909	21.448	21.4465	18.4484	19.4763	22.3165		6	6	6	13.1	13.1	13.1	70.353	14.223	G3V153;A0A087X082;Q14444;E9PLA9	Caprin-1	CAPRIN1
NaN	24.2851	23.9195	NaN	20.8922	21.7418	NaN	NaN	NaN	NaN	22.8899	23.7838		3	1	1	36.8	29.1	29.1	12.957	4.9753	A0A087X111;Q9UEU5;Q6NT46;Q4V326;Q13066		GAGE13
NaN	20.1415	NaN	NaN	18.7362	NaN	19.177	21.1723	20.1863	NaN	NaN	NaN	Spliceosome	2	2	2	9	9	9	56.399	3.6162	A0A087X1B2;B9A018;Q53GS9;C9J0X5;C9JIU2	U4/U6.U5 tri-snRNP-associated protein 2	USP39
NaN	21.4066	NaN	19.9248	NaN	NaN	NaN	21.5745	22.0263	19.4441	NaN	NaN	Alzheimer's disease;Huntington's disease;Oxidative phosphorylation;Parkinson's disease	3	3	3	50.5	50.5	50.5	11.965	12.856	A0A087X1G1;H7BYD0;Q16718;A0A087WXR5;F8WAS3;C9IZN5	NADH dehydrogenase [ubiquinone] 1 alpha subcomplex subunit 5	NDUFA5
NaN	NaN	NaN	20.8089	NaN	17.834	NaN	20.627	NaN	19.6051	NaN	NaN		3	3	3	27.4	27.4	27.4	16.219	4.131	H7C3I1;A0A087X1H6;Q8IZP2;P50502;F6VDH7;Q3KNR6;Q8NFI4	Putative protein FAM10A4;Hsc70-interacting protein;Putative protein FAM10A5	ST13;ST13P4;ST13P5
NaN	NaN	19.8054	17.4362	NaN	NaN	NaN	22.074	19.6027	19.4738	NaN	NaN	Alzheimer's disease;Citrate cycle (TCA cycle);Huntington's disease;Oxidative phosphorylation;Parkinson's disease	2	2	2	8.5	8.5	8.5	56.662	7.3512	A0A087X1I3;D6RFM5;P31040;H0Y8X1	Succinate dehydrogenase [ubiquinone] flavoprotein subunit, mitochondrial	SDHA
22.7616	21.6867	22.4204	21.8536	17.1269	19.8821	NaN	NaN	17.243	19.7773	NaN	21.9621	Tight junction	5	5	5	22.5	22.5	22.5	34.656	28.17	A0A087X1S2;P67809;H0Y449;Q9Y2T7;P16989;C9J5V9;A0A0D9SEI8	Nuclease-sensitive element-binding protein 1;Y-box-binding protein 2;Y-box-binding protein 3	YBX1;YBX2;YBX3
20.5966	21.5465	22.3064	20.1791	22.5356	19.6908	NaN	NaN	NaN	17.5755	NaN	19.7823	Antigen processing and presentation;Proteasome	4	4	4	26.4	26.4	26.4	29.126	37.247	A0A087X1Z3;Q9UL46;H0YM70;H0YKU2	Proteasome activator complex subunit 2	PSME2
NaN	NaN	22.0942	NaN	22.0956	21.8115	21.113	21.9784	NaN	17.7085	NaN	NaN		4	3	3	32.4	26.3	26.3	19.757	21.428	A0A087X271;B4DDF4;B4DUT8;Q99439;K7ES69;A0A087X1X5;H3BVI6;A0A087WV51;H3BQH0	Calponin;Calponin-2	CNN2
20.7493	20.3646	22.1154	NaN	NaN	22.2331	19.7355	20.6983	20.3367	18.6739	NaN	20.7291	Proteasome	3	3	3	11.4	11.4	11.4	45.796	9.0887	A0A087X2I1;P62333;H0YJC0;H0YJE9;H0YJT1;H0YJS8	26S protease regulatory subunit 10B	PSMC6
23.7661	24.3877	24.6153	23.6003	24.1316	23.5268	24.0264	22.9563	24.1576	24.2132	24.6358	20.8946	Calcium signaling pathway;Huntington's disease;Parkinson's disease	9	9	9	45	45	45	30.348	29.887	A0A0A0MR02;P45880;Q5JSD2;Q5JSD1;A2A3S1	Voltage-dependent anion-selective channel protein 2	VDAC2
NaN	21.0951	NaN	18.9304	NaN	20.4791	21.9186	23.738	NaN	NaN	22.857	22.7422		10	10	10	22.1	22.1	22.1	85.939	39.522	A0A0A0MRA5;B7Z4B8;Q9BUJ2;M0R3F1;M0QYZ0;M0R203;M0QZV6;M0R0K8;M0QYI8	Heterogeneous nuclear ribonucleoprotein U-like protein 1	HNRNPUL1
21.6415	17.7245	19.1775	NaN	NaN	NaN	NaN	NaN	NaN	NaN	NaN	NaN		3	3	3	22.8	22.8	22.8	26.626	5.2987	F6S8N6;A0A0A0MRJ6;H7BY58;P22061;H7C4X2;F8WDT3;F8WAV5;F8WAX2	Protein-L-isoaspartate O-methyltransferase;Protein-L-isoaspartate(D-aspartate) O-methyltransferase	PCMT1
21.9367	21.5152	22.8769	NaN	20.1679	20.8613	22.4264	21.9882	22.1594	18.5325	NaN	21.1619		4	4	4	7.8	7.8	7.8	74.543	14.875	A0A0A0MRM9;Q14978;S4R402;S4R341;S4R349	Nucleolar and coiled-body phosphoprotein 1	NOLC1
NaN	NaN	NaN	19.0591	NaN	15.6176	NaN	NaN	NaN	NaN	NaN	17.3234	Drug metabolism - cytochrome P450;Fatty acid metabolism;Glycolysis / Gluconeogenesis;Metabolism of xenobiotics by cytochrome P450;Retinol metabolism;Tyrosine metabolism	1	1	1	3.9	3.9	3.9	26.515	1.5854	D6RH17;Q8IUN7;A0A0A0MS56;P28332	Alcohol dehydrogenase 6	ADH6
NaN	NaN	NaN	18.8013	22.6718	NaN	NaN	NaN	NaN	NaN	19.9386	NaN		5	5	5	12	12	12	69.334	25.192	A0A0A0MSQ0;P13797;H7C4N2;U3KQI3;C9JAM8;Q14651	Plastin-3	PLS3
NaN	NaN	NaN	NaN	NaN	NaN	19.7092	19.9934	NaN	NaN	NaN	NaN	RNA transport	1	1	1	4.4	4.4	4.4	48.039	3.3577	E9PKD2;B7ZAV2;H0Y837;A0A0A0MSW3;P35658	Nuclear pore complex protein Nup214	NUP214
20.0119	NaN	NaN	NaN	NaN	NaN	NaN	18.5221	19.988	NaN	NaN	NaN	ABC transporters	2	2	2	0.3	0.3	0.3	576.15	1.3293	A0A0A0MT16;Q86UQ4	ATP-binding cassette sub-family A member 13	ABCA13
NaN	NaN	NaN	NaN	NaN	18.0421	NaN	NaN	NaN	17.6789	19.2434	18.0201		1	1	1	0.9	0.9	0.9	148.86	1.4707	A0A0A0MT33;O95104;Q9UPN6	Splicing factor, arginine/serine-rich 15;Protein SCAF8	SCAF8;SCAF4
21.8487	NaN	22.4226	NaN	20.9201	NaN	19.6048	NaN	NaN	NaN	23.0141	NaN	PPAR signaling pathway	1	1	1	16.5	16.5	16.5	11.15	3.3836	B8ZWD1;A0A0A0MTI5;P07108	Acyl-CoA-binding protein	DBI
20.06	20.7864	NaN	20.8594	18.4439	NaN	21.1092	22.8256	22.9676	22.0726	NaN	NaN	Bile secretion	6	6	6	20.5	20.5	20.5	49.062	15.654	A0A0R4J2G3;A0A0A0MTJ9;Q6PIU2;H7C046	Neutral cholesterol ester hydrolase 1	NCEH1
NaN	NaN	NaN	NaN	18.825	NaN	NaN	NaN	NaN	19.724	NaN	19.0028	Bacterial invasion of epithelial cells;Fc gamma R-mediated phagocytosis;Pathogenic Escherichia coli infection;Regulation of actin cytoskeleton;Shigellosis	2	2	2	19.5	19.5	19.5	13.057	4.4462	F8WDD7;H7C0A3;F8WCF6;A0A0A6YYG9;P59998	Actin-related protein 2/3 complex subunit 4	ARPC4;ARPC4-TTLL3
NaN	NaN	NaN	NaN	NaN	NaN	17.9263	NaN	18.3147	NaN	NaN	NaN		1	1	1	8.5	8.5	8.5	14.013	2.4582	I3L1U7;I3L0X9;I3L3T0;A0A0A6YYL4;Q9Y3D7	Coronin;Mitochondrial import inner membrane translocase subunit TIM16	PAM16;CORO7-PAM16
22.4026	23.0155	23.1111	21.8848	22.8468	NaN	21.325	21.8651	20.9122	20.2988	23.7297	21.0974	Biosynthesis of ansamycins;Carbon fixation in photosynthetic organisms;Pentose phosphate pathway	7	7	7	24.5	24.5	24.5	49.91	45.438	A0A0B4J1R6;P29401;E9PFF2	Transketolase	TKT
20.6627	NaN	NaN	21.7923	16.2785	NaN	NaN	18.2166	NaN	21.8571	18.6893	20.5801	Spliceosome	6	5	5	40.9	40.9	40.9	15.763	8.1463	A0A0B4J1Z1;C9JAB2;Q16629	Serine/arginine-rich splicing factor 7	SRSF7
21.3817	22.5511	23.7492	22.2023	NaN	20.3332	20.0943	17.1712	NaN	20.3217	18.5746	20.2768		4	4	4	29.8	29.8	29.8	21.525	19.986	Q5W0H4;A0A0B4J2C3;P13693;J3KPG2;E9PJF7;H0YCX0;Q56UQ5	Translationally-controlled tumor protein;TPT1-like protein	TPT1
24.0027	24.3869	24.9447	21.5066	NaN	24.842	24.0538	25.2479	24.1293	21.7621	23.1724	24.6532		4	4	4	31.2	31.2	31.2	31.124	36.795	A0A0C4DFV9;Q01105;A0A087X027;P0DME0	Protein SET;Protein SETSIP	SET;SETSIP
23.3788	24.0714	24.6107	24.5833	23.5017	24.5533	23.4902	24.4865	23.0982	23.6241	21.7843	23.9084	Ribosome	12	12	12	65.5	65.5	65.5	29.505	79.01	C9J9K3;A0A0C4DG17;P08865;F8WD59	40S ribosomal protein SA	RPSA
20.508	20.7183	22.0773	NaN	21.2668	18.2026	NaN	NaN	NaN	NaN	NaN	NaN		3	3	3	34.4	34.4	34.4	15.958	13.142	K7EM73;K7ELJ7;A0A0C4DGQ5;P04632;K7EIV0;A0A075B7C0;K7ES78;K7EMQ1;U3KQE2;K7EKD8	Calpain small subunit 1	CAPNS1
NaN	NaN	NaN	20.1421	NaN	21.7977	20.1824	19.985	22.4339	21.1733	19.6902	21.0585	N-Glycan biosynthesis;Protein processing in endoplasmic reticulum;Various types of N-glycan biosynthesis	5	5	5	19.8	19.8	19.8	48.799	12.166	A0A0C4DGS1;P39656;U3KQ84	Dolichyl-diphosphooligosaccharide--protein glycosyltransferase 48 kDa subunit	DDOST
NaN	NaN	NaN	NaN	NaN	NaN	19.5898	20.4616	19.9829	NaN	NaN	NaN	Lysosome	1	1	1	4.9	4.9	4.9	60.457	4.4391	A0A0C4DGZ9;O14773	Tripeptidyl-peptidase 1	TPP1
21.0143	20.3565	NaN	21.201	NaN	NaN	NaN	19.4333	19.2714	20.4677	NaN	NaN	Spliceosome	1	1	1	7.3	7.3	7.3	14.437	2.8129	B4DJK0;B4DUA4;A0A0D9SEM4;Q13243;Q13247;Q08170	Serine/arginine-rich splicing factor 5;Serine/arginine-rich splicing factor 6;Serine/arginine-rich splicing factor 4	SRSF5;SRSF4;SRSF6
22.7001	21.7769	17.6402	21.7904	20.9315	22.7313	21.0154	22.1435	20.3855	NaN	21.0145	23.0235	RIG-I-like receptor signaling pathway	7	6	6	14.5	12.8	12.8	70.839	44.136	A0A0D9SFB3;A0A0D9SG12;A0A0D9SF53;O00571;O15523;A0A0J9YVQ7;A0A087WVZ1;C9J8G5;C9J081	ATP-dependent RNA helicase DDX3X;ATP-dependent RNA helicase DDX3Y	DDX3X;DDX3Y
20.0154	19.5584	NaN	NaN	22.1667	NaN	20.2895	20.5512	20.0419	NaN	19.2055	19.9308		7	7	7	5	5	5	282.83	18.825	A0A0D9SF54;A0A0D9SGF6;Q13813	Spectrin alpha chain, non-erythrocytic 1	SPTAN1
NaN	NaN	NaN	NaN	17.933	18.524	NaN	NaN	NaN	NaN	NaN	NaN	Focal adhesion;Regulation of actin cytoskeleton;Shigellosis	2	2	2	2.6	2.6	2.6	136.85	2.0836	H9KV28;A0A0G2JH68;O60610	Protein diaphanous homolog 1	DIAPH1
NaN	NaN	NaN	NaN	NaN	NaN	19.4034	NaN	21.0307	NaN	NaN	NaN	Allograft rejection;Antigen processing and presentation;Autoimmune thyroid disease;Cell adhesion molecules (CAMs);Endocytosis;Graft-versus-host disease;Natural killer cell mediated cytotoxicity;Phagosome;Type I diabetes mellitus;Viral myocarditis	2	2	1	10.4	10.4	4.7	34.211	7.8747	Q5SRN7;A0A0G2JI36;Q5SRN5;A0A0G2JIF2;A0A0G2JL56;Q29940;P30685;P30498;P30495;P30493;P30492;P30491;P30490;P30484;P30464;P18465;P18464;P10319;P30455;P30447;P30443;P16188;P13746;P05534;P04439;Q29960;P30508;Q95604;Q9GJ45;A0A0G2JNY4;B0UXQ0;A0A0G2JPD3;P30512;P30459;P30457;P30456;P30453;P30450;P18462;P16190;P16189;P10316;P10314;P01892;P01891;P30510;P30504	HLA class I histocompatibility antigen, B-59 alpha chain;HLA class I histocompatibility antigen, B-35 alpha chain;HLA class I histocompatibility antigen, B-78 alpha chain;HLA class I histocompatibility antigen, B-56 alpha chain;HLA class I histocompatibility antigen, B-55 alpha chain;HLA class I histocompatibility antigen, B-54 alpha chain;HLA class I histocompatibility antigen, B-53 alpha chain;…	HLA-A;HLA-B;HLA-C
23.9373	24.2565	24.17	23.3305	18.1718	21.5311	19.1563	21.5074	20.9158	22.0358	23.7585	22.825		13	12	8	34	31.9	22.1	70.108	54.756	A0A0G2JIW1;P0DMV9;P0DMV8;V9GZ37	Heat shock 70 kDa protein 1B;Heat shock 70 kDa protein 1A	HSPA1B;HSPA1A
21.183	19.6506	NaN	NaN	NaN	NaN	19.0989	21.5816	NaN	NaN	NaN	NaN		2	2	2	29.5	29.5	29.5	16.768	9.2431	C9J2P2;C9J2C4;A0A0J9YX62;O75190;C9JDR7;C9JDX6;F8WCZ4;E9PH18	DnaJ homolog subfamily B member 6	DNAJB6
24.9851	24.7191	24.9412	22.7279	24.1212	24.4037	24.6586	25.7055	25.7724	22.533	23.6216	24.5445		11	11	11	20.1	20.1	20.1	94.622	57.934	A0A0R4J2E8;A8MXP9;P43243;D6REM6;D6R991;B3KM87;H0Y8T4;D6RBI2;D6RE02;D6RIA2;D6RAM9;D6RAY2;D6RBK5;Q68E03;D6RB45;D6R9F3;D6RBS2;D6RCM3;D6REK4;D6R8Z5	Matrin-3	MATR3
23.6969	23.4008	23.0002	19.2136	22.505	23.1278	22.8671	23.488	21.8969	18.4351	23.7358	24.2856	Fatty acid biosynthesis;Insulin signaling pathway	28	28	28	17.7	17.7	17.7	273.2	68.214	A0A0U1RQF0;P49327;A0A0U1RRG3;J3KTF0	Fatty acid synthase;[Acyl-carrier-protein] S-acetyltransferase;[Acyl-carrier-protein] S-malonyltransferase;3-oxoacyl-[acyl-carrier-protein] synthase;3-oxoacyl-[acyl-carrier-protein] reductase;3-hydroxyacyl-[acyl-carrier-protein] dehydratase;Enoyl-[acyl-carrier-protein] reductase;Oleoyl-[acyl-carrier-protein] hydrolase	FASN
NaN	NaN	NaN	NaN	NaN	NaN	20.554	20.494	21.4847	NaN	NaN	NaN		1	1	1	8.1	8.1	8.1	14.967	4.2693	A0A0U1RQT9;C9JYN0;Q16563	Synaptophysin-like protein 1	SYPL1
25.1479	25.487	25.1913	23.2691	23.7144	24.2771	24.7198	26.2906	26.1733	23.5591	24.3879	23.9837		16	16	16	51	51	51	56.51	81.717	A6NLN1;A0A0U1RRM4;P26599;K7EKJ7;K7ES59;A0A0D9SF20;K7EK45;K7ELW5;A0A087WU68;A0A087WUW5;X6R242;O95758	Polypyrimidine tract-binding protein 1	PTBP1
NaN	NaN	NaN	21.6629	NaN	NaN	18.9197	19.6676	18.6421	23.8927	21.2494	20.3924	Carbon fixation pathways in prokaryotes;Citrate cycle (TCA cycle);Glyoxylate and dicarboxylate metabolism	11	11	11	18.9	18.9	18.9	87.819	37.624	A2A274;Q99798	Aconitate hydratase, mitochondrial	ACO2
NaN	NaN	22.7115	20.1647	21.5278	20.6836	NaN	NaN	NaN	19.4769	21.2466	NaN	MAPK signaling pathway	1	1	1	15.1	15.1	15.1	9.8642	6.0601	A2A2D0;P16949	Stathmin	STMN1
21.628	NaN	21.6667	NaN	NaN	NaN	NaN	20.8352	NaN	NaN	NaN	NaN	Gap junction;Pathogenic Escherichia coli infection;Phagosome	4	1	1	8.3	3.8	3.8	49.908	1.7697	A6NHL2	Tubulin alpha chain-like 3	TUBAL3
19.6547	19.4316	19.285	NaN	NaN	NaN	16.6771	18.575	NaN	NaN	19.1762	NaN		1	1	1	2.1	2.1	2.1	37.879	1.5998	A6NHS7	MANSC domain-containing protein 4	MANSC4
NaN	NaN	20.9166	NaN	20.3387	NaN	18.6715	NaN	NaN	NaN	19.4406	16.7543		4	4	4	11.6	11.6	11.6	51.086	11.18	A6NJA2;P54578;J3QQT6;J3KS55	Ubiquitin carboxyl-terminal hydrolase;Ubiquitin carboxyl-terminal hydrolase 14	USP14
NaN	NaN	NaN	NaN	NaN	NaN	21.0718	21.3205	21.2879	NaN	NaN	NaN	B cell receptor signaling pathway;Hepatitis C;Malaria	1	1	1	9.7	9.7	9.7	17.963	5.4719	E9PJK1;E9PRJ8;H0YDL9;H0YDJ9;E9PIF1;A6NMH8;P60033	Tetraspanin;CD81 antigen	CD81
19.4791	19.8309	20.6392	18.1687	19.8688	NaN	NaN	NaN	NaN	NaN	18.7498	NaN		4	4	4	13.1	13.1	13.1	53.046	6.9604	A6PVH9;F2Z2V0;B0QZ18;Q99829;Q5JX58;Q5JX59;Q5JX61;Q5JX60;Q5JX44;Q5JX52;Q5JX45;E7ENH5;Q5JX56;Q5JX53;Q5JX54;Q5JX57;E7EV27;Q5JX55	Copine-1	CPNE1
NaN	20.6852	20.5417	NaN	21.0868	NaN	NaN	NaN	NaN	NaN	20.5507	21.1597		3	3	3	27.1	27.1	27.1	32.936	8.7051	F6WIT2;A6PVN5;Q15257;A6PVN9;B7ZBQ0;Q68CR8;H0Y562;A6PVN8;C9IZ76;A6PVN6;H0Y6E5;Q5T949;Q5T948	Serine/threonine-protein phosphatase 2A activator	PPP2R4
21.4936	21.1464	NaN	NaN	21.1363	NaN	20.0687	19.9958	22.1203	NaN	NaN	NaN	Spliceosome;Systemic lupus erythematosus	2	2	2	8.9	8.9	8.9	17.546	3.443	J3QLE5;A8MT02;P63162;P14678;J3KRY3;S4R3P3	Small nuclear ribonucleoprotein-associated protein N;Small nuclear ribonucleoprotein-associated proteins B and B	SNRPN;SNRPB
20.5739	20.076	20.0478	19.5151	17.7504	16.7612	17.8315	18.7922	NaN	18.7934	20.0102	17.5965	RNA transport	1	1	1	8.9	8.9	8.9	15.317	10.051	A8MUA9;A8MU27;Q6EEV6;P61956;P55854	Small ubiquitin-related modifier 4;Small ubiquitin-related modifier 2;Small ubiquitin-related modifier 3	SUMO3;SUMO4;SUMO2
24.1455	24.9808	21.304	22.6066	21.1191	23.5858	22.1312	24.7891	24.1768	20.5845	19.7058	23.8528	Ribosome	8	8	8	32.2	32.2	32.2	24.433	21.486	A8MUD9;P18124;C9JIJ5;C9JZ88	60S ribosomal protein L7	RPL7
18.3603	18.0917	18.4823	19.522	NaN	20.1839	NaN	NaN	20.5985	NaN	NaN	16.3523	Ribosome	6	6	6	36.1	36.1	36.1	17.692	7.2619	H7BY10;K7EJV9;K7ERT8;A8MUS3;P62750;K7EMA7	60S ribosomal protein L23a	RPL23A
NaN	NaN	20.7285	19.3703	17.9458	NaN	NaN	NaN	19.893	NaN	NaN	NaN	Spliceosome	2	2	2	31.2	31.2	31.2	7.1013	1.5686	Q49AN9;F5H013;P62308;A8MWD9;C9JVQ0	Small nuclear ribonucleoprotein G;Putative small nuclear ribonucleoprotein G-like protein 15	SNRPG;SNRPGP15
24.2954	23.5962	23.5913	23.2914	23.4875	22.4664	23.215	24.1074	24.723	23.7128	22.9783	24.0883	Non-homologous end-joining	15	15	15	34.3	34.3	34.3	64.283	61.214	B1AHC9;P12956	X-ray repair cross-complementing protein 6	XRCC6
22.0262	21.8349	NaN	20.9006	NaN	NaN	19.612	18.6189	18.4826	22.4013	NaN	NaN	Ribosome biogenesis in eukaryotes;Spliceosome	3	3	3	26.5	26.5	26.5	14.627	11.785	B1AHD1;P55769	NHP2-like protein 1;NHP2-like protein 1, N-terminally processed	NHP2L1
20.2761	20.1301	NaN	NaN	NaN	NaN	17.9767	20.0315	20.3466	NaN	19.8211	NaN	Amino sugar and nucleotide sugar metabolism	1	1	1	7.5	7.5	7.5	16.696	3.6794	B1AHF3;P00387	NADH-cytochrome b5 reductase 3;NADH-cytochrome b5 reductase 3 membrane-bound form;NADH-cytochrome b5 reductase 3 soluble form	CYB5R3
23.3839	23.3875	NaN	20.991	22.5116	19.7004	21.1979	22.4067	21.0243	19.3009	21.0505	19.6848		4	4	4	22.3	22.3	22.3	29.295	12.382	B1AK87;B1AK88;P47756;B1AK85	F-actin-capping protein subunit beta	CAPZB
NaN	NaN	NaN	NaN	18.4514	18.2344	NaN	NaN	NaN	NaN	NaN	NaN	Pentose phosphate pathway;Purine metabolism	1	1	1	13.2	13.2	13.2	12.324	4.633	B7ZB02;H7C540;B1ALA9;P60891;P11908	Ribose-phosphate pyrophosphokinase 1;Ribose-phosphate pyrophosphokinase 2	PRPS1;PRPS2
26.5308	26.0234	25.6909	26.297	23.8779	21.6539	23.9551	24.2764	25.4211	26.5164	25.9556	24.6381	Systemic lupus erythematosus	6	6	2	41.3	41.3	7.9	13.906	49.756	B2R4S9;U3KQK0;Q99880;Q99879;Q99877;Q93079;Q5QNW6;P62807;P58876;O60814;P57053;Q96A08	Histone H2B;Histone H2B type 1-L;Histone H2B type 1-M;Histone H2B type 1-N;Histone H2B type 1-H;Histone H2B type 2-F;Histone H2B type 1-C/E/F/G/I;Histone H2B type 1-D;Histone H2B type 1-K;Histone H2B type F-S	HIST1H2BI;HIST1H2BN;HIST1H2BL;HIST1H2BM;HIST1H2BH;HIST2H2BF;HIST1H2BC;HIST1H2BD;HIST1H2BK;H2BFS
23.5726	24.1418	23.9024	24.5179	23.5784	23.4209	23.6975	24.7717	25.0685	24.6132	23.5296	24.0347		8	8	1	37.4	37.4	6.9	28.916	56.082	G3V4W0;B4DY08;B2R5W2;G3V4C1;G3V5X6;G3V3K6;G3V251;B4DSU6;G3V2D6;A0A0G2JPF8;A0A0G2JNQ3;P0DMR1;O60812;B7ZW38;B2RXH8;G3V4M8;G3V5V7;G3V2H6	Heterogeneous nuclear ribonucleoprotein C-like 4;Heterogeneous nuclear ribonucleoprotein C-like 1;Heterogeneous nuclear ribonucleoprotein C-like 3;Heterogeneous nuclear ribonucleoprotein C-like 2	HNRNPC;HNRNPCL4;HNRNPCL1;HNRNPCL3;HNRNPCL2
NaN	22.0624	22.2071	20.4075	18.0401	NaN	NaN	20.4448	NaN	18.9849	NaN	21.3872	Aminoacyl-tRNA biosynthesis	2	2	2	12.5	12.5	12.5	31.93	8.5109	E7ETE2;B4E1C5;B4DDD8;B3KWE1;P12081	Histidine--tRNA ligase, cytoplasmic	HARS
19.0804	19.8972	19.8697	NaN	NaN	19.1726	NaN	NaN	NaN	NaN	NaN	19.066		2	2	2	11.9	11.9	11.9	44.228	5.8406	B4DIH5;P61201;H0YM03;H0YKU5	COP9 signalosome complex subunit 2	COPS2
NaN	NaN	NaN	18.3985	NaN	NaN	NaN	NaN	20.0988	18.9928	20.8573	NaN	Alzheimer's disease;Huntington's disease;Oxidative phosphorylation;Parkinson's disease	4	4	4	10.5	10.5	10.5	66.921	4.8779	B4DJ81;P28331	NADH-ubiquinone oxidoreductase 75 kDa subunit, mitochondrial	NDUFS1
22.9517	23.795	23.4152	23.4345	20.2067	23.625	24.0771	25.6319	24.7152	23.9936	22.2542	23.6336	Citrate cycle (TCA cycle);Glyoxylate and dicarboxylate metabolism	16	16	15	51.2	51.2	49.2	50.431	49.778	B4DJV2;O75390;A0A0C4DGI3;H0YIC4;F8VRI6;F8VPA1;F8VRP1;F8VX68;F8VPF9;F8W1S4;F8W4S1;H0YH82;F8VZK9;F8VX07;F8VWQ5;F8VR34;F8VTT8;F8W642;F8W0J2;F8VU34	Citrate synthase;Citrate synthase, mitochondrial	CS
19.258	NaN	21.6943	21.1345	NaN	20.7287	NaN	20.8191	NaN	21.3857	NaN	20.4251		3	3	3	10.4	10.4	10.4	48.099	16.245	B4DLN1;P52815;F6QW41	39S ribosomal protein L12, mitochondrial	MRPL12
22.9783	22.6097	23.7157	20.9859	22.8561	22.3212	NaN	NaN	NaN	17.3925	20.6712	22.2256		6	6	6	37.1	37.1	37.1	22.793	15.538	B4DLR8;P15559;H3BRK3;H3BNV2	NAD(P)H dehydrogenase [quinone] 1	NQO1
NaN	NaN	NaN	NaN	NaN	20.3283	NaN	18.7394	NaN	NaN	17.3847	20.1557		1	1	1	3.1	3.1	3.1	50.99	7.7811	E7EU85;E9PFF5;B4DXZ6;P51114	Fragile X mental retardation syndrome-related protein 1	FXR1
18.3476	NaN	19.6515	NaN	NaN	19.9963	NaN	19.2029	NaN	NaN	18.8085	20.3907		1	1	1	30.8	30.8	30.8	5.8457	6.9453	F8W1Z8;B4DZG7;P40616	ADP-ribosylation factor-like protein 1	ARL1
NaN	21.7643	22.1946	NaN	19.3968	19.9679	NaN	NaN	NaN	NaN	NaN	21.369		2	2	2	10.8	10.8	10.8	41.603	4.9715	B4E3S0;Q9ULV4;F8VV53;F8W1H8;F8VUX3;F8VSA4;F8VRE9;H0YHL7;F8VTT6;F8VVB7	Coronin;Coronin-1C	CORO1C
19.6183	19.2813	19.8301	19.608	NaN	19.8863	NaN	NaN	NaN	16.1889	18.8579	19.1276		2	2	2	10.6	10.6	10.6	31.357	8.8107	B5MBZ8;C9JD73;C9J177;H7C003;Q15435	Protein phosphatase 1 regulatory subunit 7	PPP1R7
23.3863	23.7317	23.6548	23.7055	24.2046	24.3817	23.5221	22.5938	23.0068	22.8176	NaN	23.3129	Ribosome biogenesis in eukaryotes;RNA transport	9	9	9	39.5	39.5	39.5	26.224	40.838	B5MDF5;P62826;J3KQE5;F5H018;B4DV51;H0YFC6;A0A087X0W0	GTP-binding nuclear protein Ran	RAN
20.364	21.1383	19.5794	NaN	NaN	NaN	19.2146	21.3315	NaN	NaN	20.2266	15.6294	RNA transport	4	4	4	4.3	4.3	4.3	105.34	19.626	Q99613;B5ME19;H3BTY8;H3BPE3;H3BPE4	Eukaryotic translation initiation factor 3 subunit C;Eukaryotic translation initiation factor 3 subunit C-like protein	EIF3C;EIF3CL
22.8092	20.9863	23.1894	18.818	17.1336	NaN	22.5433	22.8916	22.8617	NaN	NaN	NaN	Ribosome	4	4	4	35.2	35.2	35.2	12.701	13.496	H7C2W9;C9JU56;B7Z4E3;B7Z4C8;P62899;B8ZZK4	60S ribosomal protein L31	RPL31
21.2414	19.9105	NaN	NaN	NaN	NaN	19.0183	19.338	NaN	NaN	NaN	NaN	mRNA surveillance pathway	3	3	3	12.1	12.1	12.1	47.475	9.4131	B7Z7P8;P62495;D6RCB3;D6RJE8;I3L492	Eukaryotic peptide chain release factor subunit 1	ETF1
NaN	NaN	NaN	20.0691	NaN	NaN	NaN	NaN	NaN	19.393	NaN	20.0182	RNA degradation;Spliceosome	1	1	1	29.7	29.7	29.7	7.0202	3.4933	B8ZZF8;Q9Y4Y9	U6 snRNA-associated Sm-like protein LSm5	LSM5
21.244	NaN	NaN	20.3513	20.6678	NaN	18.6094	20.1892	20.8524	21.6454	20.5927	NaN		4	4	4	9	9	9	68.064	10.145	H7C463;C9J406;B9A067;Q16891	MICOS complex subunit MIC60	IMMT
24.6517	25.2467	23.8491	23.1403	23.7388	21.6005	23.0608	24.906	24.544	NaN	21.2706	21.5338	Ribosome	3	3	3	41.8	41.8	41.8	9.6694	8.3167	C9JD32;B9ZVP7;J3KT29;P62829	60S ribosomal protein L23	RPL23
20.2961	22.2312	22.192	NaN	19.9317	19.2661	NaN	20.4329	NaN	NaN	20.2041	19.6161		4	4	4	51	51	51	17.695	16.365	C9J188;C9JWF5;C9JFN4;C9IZ80;Q7L1Q6;C9JV57	Basic leucine zipper and W2 domain-containing protein 1	BZW1
NaN	NaN	NaN	NaN	21.4009	NaN	20.0599	NaN	21.4435	NaN	NaN	NaN	Protein processing in endoplasmic reticulum	1	1	1	3	3	3	29.573	1.303	C9J3L8;C9J5W0;E9PAL7;C9IZQ1;P43307	Translocon-associated protein subunit alpha	SSR1
20.1495	NaN	NaN	21.5692	21.7472	22.4092	NaN	NaN	NaN	17.1386	19.8295	19.9504		3	3	3	41.2	41.2	41.2	14.77	12.084	C9IZU3;C9J938;C9JB25;Q15019;C9JFT1;F8WB65;C9JZI2;C9IY94;C9JQJ4;C9J2Q4;B5MCX3;C9JT15;C9JSE7;B5MD47;H7C310	Septin-2	SEPT2
NaN	NaN	NaN	NaN	21.1903	NaN	20.9905	20.875	NaN	18.7069	NaN	NaN		2	2	2	25.7	25.7	25.7	15.228	3.4975	H0YAL7;D6RBD7;C9J1V9;O43324;D6RCQ0	Eukaryotic translation elongation factor 1 epsilon-1	EEF1E1;EEF1E1-BLOC1S5
18.2694	19.7072	20.4086	NaN	NaN	NaN	NaN	NaN	NaN	NaN	NaN	NaN	Apoptosis;Insulin signaling pathway	2	2	2	29.8	29.8	29.8	12.702	2.9265	C9J830;P13861	cAMP-dependent protein kinase type II-alpha regulatory subunit	PRKAR2A
NaN	NaN	NaN	15.5921	18.3488	NaN	NaN	18.0633	NaN	NaN	17.2868	18.1115		1	1	1	7.1	7.1	7.1	16.658	3.706	E9PNC7;E9PQX9;C9JCC6;Q14919	Dr1-associated corepressor	DRAP1
NaN	20.5811	21.807	22.8709	22.1282	NaN	21.0241	22.7737	22.7948	22.1477	22.0284	NaN	Alzheimer's disease;Amyotrophic lateral sclerosis (ALS);Apoptosis;Colorectal cancer;Huntington's disease;ko05152;p53 signaling pathway;Parkinson's disease;Pathways in cancer;Small cell lung cancer;Toxoplasmosis;Viral myocarditis	4	4	4	42.6	42.6	42.6	11.333	17.53	C9JFR7;P99999;CON__P62894	Cytochrome c	CYCS
NaN	NaN	NaN	20.5266	21.8303	21.4326	21.4403	21.9975	22.4132	20.1311	20.8648	20.0899	Oxidative phosphorylation	2	2	2	44.4	44.4	44.4	5.9149	8.095	C9JJT5;C9JU26;G3V325;P56134	ATP synthase subunit f, mitochondrial	ATP5J2-PTCD1;ATP5J2
NaN	NaN	NaN	NaN	NaN	NaN	20.8628	NaN	22.4014	NaN	NaN	NaN	Bacterial invasion of epithelial cells;Endocytosis;Focal adhesion;Viral myocarditis	1	1	1	15.2	15.2	15.2	15.928	2.2838	C9JKI3;E9PCT5;Q03135	Caveolin;Caveolin-1	CAV1
NaN	NaN	NaN	18.9442	NaN	NaN	NaN	NaN	NaN	17.9593	17.3938	NaN	Cytosolic DNA-sensing pathway;Huntington's disease;Purine metabolism;Pyrimidine metabolism;RNA polymerase	2	2	2	12.8	12.8	12.8	16.996	7.7402	C9JLU1;P52434	DNA-directed RNA polymerases I, II, and III subunit RPABC3	POLR2H
NaN	NaN	NaN	18.8068	NaN	NaN	NaN	NaN	NaN	17.4028	18.7248	NaN		1	1	1	60	60	60	2.1494	4.3848	J3QL22;J3QS85;J3KTQ1;J3QKR0;C9JLV5;Q9UNS2	COP9 signalosome complex subunit 3	COPS3
NaN	NaN	NaN	NaN	18.8327	NaN	NaN	20.9773	21.4863	NaN	NaN	NaN	Adherens junction;Axon guidance;Bacterial invasion of epithelial cells;Chemokine signaling pathway;Colorectal cancer;Endocytosis;Focal adhesion;ko05152;Leukocyte transendothelial migration;Neurotrophin signaling pathway;Pancreatic secretion;Pathogenic Escherichia coli infection;Pathways in cancer;Regulation of actin cytoskeleton;T cell receptor signaling pathway;TGF-beta signaling pathway;Tight j…	6	1	1	58.9	18.6	18.6	14.669	2.9333	C9JNR4;C9JX21;P61586;C9JRM1;P62745	Transforming protein RhoA	RHOA
21.0521	21.6344	NaN	21.3008	NaN	20.6998	NaN	19.5175	20.9535	NaN	NaN	21.5598	Ribosome	2	2	2	17.4	17.4	17.4	14.369	8.8148	C9JXB8;C9JNW5;P83731	60S ribosomal protein L24	RPL24
22.4102	22.5695	22.5029	17.812	22.3262	23.052	21.5429	21.4286	20.8424	NaN	NaN	21.5487		1	1	1	12.9	12.9	12.9	12.302	8.6639	C9JTK6;J3KQ32;Q9NTK5	Obg-like ATPase 1	OLA1
NaN	NaN	NaN	NaN	19.3842	20.6914	NaN	NaN	NaN	NaN	NaN	20.3974		2	2	2	45.9	45.9	45.9	8.1953	5.0242	C9JZD8;E7EQT5;E7ETV3;O00410;C9J875;C9JQT6;E7ESA1;E7ESZ1;E7EWK4;E7EX05;E7ETV8;E7EV12;C9JMV5;H0Y8C6	Importin-5	IPO5
NaN	NaN	NaN	NaN	18.7932	18.7241	NaN	NaN	NaN	NaN	NaN	NaN	Adherens junction;Leukocyte transendothelial migration	2	2	2	3.7	3.7	3.7	104.85	2.9289	C9JZR2;O60716;E9PKY0	Catenin delta-1	CTNND1
19.9196	20.479	NaN	NaN	NaN	NaN	NaN	20.8149	19.9474	NaN	19.2222	19.6352	Ribosome	2	2	2	17.3	17.3	17.3	15.616	11.22	D3YTB1;F8W727;P62910;D3YTI8	60S ribosomal protein L32	RPL32
22.335	20.6571	NaN	NaN	19.0731	NaN	NaN	NaN	NaN	NaN	NaN	19.9003		4	4	4	14	14	14	47.037	11.302	D6R9I9;P61221;D6RGF4;H0Y990	ATP-binding cassette sub-family E member 1	ABCE1
21.3431	21.6184	22.0612	NaN	NaN	NaN	NaN	NaN	NaN	NaN	NaN	21.6076		2	2	2	21.3	21.3	21.3	11.67	5.1038	D6RFH2;D6RDN0;D6R9V8;H0Y8K3;Q9UKY7	Protein CDV3 homolog	CDV3
23.5097	22.0176	NaN	22.6885	21.8612	22.3969	NaN	24.1106	NaN	21.9674	22.2572	22.8038	Ribosome	4	4	4	39	39	39	20.874	29.138	D6RAN4;P32969;H0Y9V9;H0Y9R4;E7ESE0	60S ribosomal protein L9	RPL9
20.2025	19.7045	20.6817	NaN	19.7046	20.4332	NaN	NaN	NaN	NaN	NaN	NaN		3	3	3	17.5	17.5	17.5	31.433	3.7551	D6RD63;D6RAX7;D6RFN0;Q9BT78	COP9 signalosome complex subunit 4	COPS4
NaN	20.4307	20.0298	NaN	NaN	NaN	NaN	NaN	NaN	NaN	NaN	NaN	Protein processing in endoplasmic reticulum	2	1	1	20	13.5	13.5	19.047	3.0706	D6RD69;Q9Y6B6;D6R9R5;Q9H029	GTP-binding protein SAR1b	SAR1B;DKFZp434B2017
20.6271	20.6333	NaN	NaN	NaN	NaN	NaN	NaN	NaN	NaN	NaN	NaN	Ubiquitin mediated proteolysis	1	1	1	8.9	8.9	8.9	14.035	2.018	D6RDM7;P61086	Ubiquitin-conjugating enzyme E2 K	UBE2K
NaN	NaN	16.9487	17.4486	NaN	NaN	NaN	NaN	NaN	16.997	16.4363	NaN		2	2	2	7.5	7.5	7.5	49.005	3.4603	D6RGI3;D6RER5;Q9NVA2;H0Y9G8;H0Y961	Septin-11	SEPT11
NaN	NaN	NaN	NaN	17.7201	NaN	17.0519	NaN	17.839	NaN	NaN	NaN		1	1	1	9.2	9.2	9.2	14.846	6.235	D6RFH4;H3BUX2;J3KNF8;O43169	Cytochrome b5 type B	CYB5B
NaN	NaN	NaN	21.5186	NaN	NaN	NaN	NaN	NaN	21.2814	19.113	NaN		3	3	3	25.1	25.1	25.1	19.023	11.789	D6RG39;D6RIT9;Q9NX40;D6R918;D6RBC5;D6RDI5;D6RA54;D6RC55;D6RF07;D6RI08;D6RDK1;D6RIV2;D6R9T5;D6RDK6;D6RBN5	OCIA domain-containing protein 1	OCIAD1
20.6358	NaN	20.1402	21.2195	NaN	NaN	19.1259	20.7221	NaN	20.899	20.3679	NaN	Alzheimer's disease;Cardiac muscle contraction;Huntington's disease;Oxidative phosphorylation;Parkinson's disease	1	1	1	14.3	14.3	14.3	10.264	1.7239	D6RIE3;D6RGV5;H0UI06;P14406	Cytochrome c oxidase subunit 7A2, mitochondrial	COX7A2
21.2294	NaN	21.9919	NaN	21.0295	NaN	21.7016	NaN	21.4728	18.3421	19.7617	NaN		1	1	1	65.6	65.6	65.6	3.5258	34.185	K7EQX4;K7ENN6;K7EIF7;K7EQL0;K7ENX8;K7ELV6;K7EJV5;K7ELT6;K7EJV1;K7EMY9;K7EPM4;K7ER40;K7EQR7;D6W5Y5;Q14011	Cold-inducible RNA-binding protein	CIRBP
21.8443	21.2971	22.0727	NaN	NaN	NaN	19.5792	NaN	19.8358	NaN	20.8378	NaN	Mineral absorption	2	2	2	44.1	44.1	44.1	6.3304	2.9532	E5RGN3;E5RIM7;O00244	Copper transport protein ATOX1	ATOX1
20.7165	20.4469	20.3923	20.1016	NaN	NaN	NaN	NaN	NaN	NaN	NaN	NaN	Pathways in cancer;Renal cell carcinoma;Ubiquitin mediated proteolysis	1	1	1	18.5	18.5	18.5	6.968	1.4914	R4GMY8;E5RHG8;Q15369	Transcription elongation factor B polypeptide 1	TCEB1
23.7424	23.988	20.6913	22.5297	19.9781	NaN	NaN	23.3274	22.737	21.2723	21.1212	21.6608	Ribosome	3	3	3	41.2	41.2	41.2	12.656	14.885	E5RI99;P62888;A0A0B4J213;E5RJH3;A0A0C4DH44	60S ribosomal protein L30	RPL30
NaN	NaN	NaN	20.4308	19.8607	NaN	NaN	NaN	NaN	NaN	19.8997	NaN		2	2	2	5.7	5.7	5.7	51.776	2.4709	E5RK69;P08133;E7EMC6	Annexin;Annexin A6	ANXA6
NaN	NaN	NaN	19.194	20.2223	NaN	NaN	NaN	NaN	19.7671	NaN	NaN	Lysosome	2	2	2	32	32	32	13.078	16.016	G3V2V8;J3KMY5;H0YIZ1;G3V3E8;E7EMS2;G3V3D1;P61916	Epididymal secretory protein E1	NPC2
21.7615	22.8657	NaN	21.337	NaN	NaN	NaN	21.6156	21.2774	18.2945	NaN	21.9995	Ribosome	2	2	2	17.7	17.7	17.7	14.558	10.565	E7EPB3;P50914	60S ribosomal protein L14	RPL14
24.8553	25.1626	25.4396	24.0222	23.783	22.2795	22.5686	22.5516	23.6751	23.5303	24.4356	24.2049	Gastric acid secretion;Leukocyte transendothelial migration;Pathogenic Escherichia coli infection;Regulation of actin cytoskeleton	16	16	8	28.7	28.7	19.8	69.371	62.882	E7EQR4;P15311	Ezrin	EZR
NaN	NaN	NaN	18.1619	NaN	NaN	NaN	19.7224	NaN	20.0709	20.2602	NaN	Peroxisome;Primary bile acid biosynthesis	4	4	4	14.2	14.2	14.2	53.928	10.01	E7ER27;P51659;G5E9S2;E7ET17;E7EWE5;E7EPL9	Peroxisomal multifunctional enzyme type 2;(3R)-hydroxyacyl-CoA dehydrogenase;Enoyl-CoA hydratase 2	HSD17B4
19.6496	19.5251	21.3853	19.3391	NaN	19.3041	NaN	NaN	19.5993	NaN	NaN	19.912	Cell cycle;Cell cycle - yeast;Circadian rhythm - mammal;Oocyte meiosis;Protein processing in endoplasmic reticulum;TGF-beta signaling pathway;Ubiquitin mediated proteolysis;Wnt signaling pathway	2	2	2	19	19	19	16.034	16.705	E7ERH2;F8W8N3;P63208;E5RJR5	S-phase kinase-associated protein 1	SKP1
NaN	NaN	NaN	NaN	NaN	NaN	18.4502	NaN	18.9233	NaN	NaN	NaN	Spliceosome	1	1	1	1.5	1.5	1.5	118.25	2.2805	E7ET15;O15042	U2 snRNP-associated SURP motif-containing protein	U2SURP
19.9929	19.9413	17.0184	NaN	16.4776	NaN	NaN	20.9065	17.0603	18.9436	NaN	NaN	Ribosome biogenesis in eukaryotes	3	3	3	3.5	3.5	3.5	144.12	8.9519	J3KQ96;E7ETY2;Q13428;H0YA99	Treacle protein	TCOF1
NaN	19.611	NaN	19.2849	NaN	19.6054	NaN	NaN	NaN	18.3157	19.6066	20.0319	Adherens junction;Circadian rhythm - plant;Measles;Ribosome biogenesis in eukaryotes;Tight junction;Wnt signaling pathway	4	4	4	20.3	20.3	20.3	45.31	2.7614	E7EU96;Q5U5J2;P68400;Q8NEV1;A0A087WY74	Casein kinase II subunit alpha;Casein kinase II subunit alpha 3	CSNK2A1;CSNK2A3
NaN	22.542	NaN	NaN	NaN	NaN	NaN	NaN	NaN	18.3651	18.8468	22.2997	RNA transport;Viral myocarditis	5	5	5	5.3	5.3	5.3	158.64	9.3969	E7EX73;E9PGM1;E7EUU4;Q04637;A0A0A0MR52;H7C044;C9J6B6;C9J2Z7;C9K073;C9JF13	Eukaryotic translation initiation factor 4 gamma 1	EIF4G1
19.4358	19.6521	19.51	NaN	18.5339	17.0103	NaN	NaN	NaN	NaN	23.3059	20.3439		7	7	7	6.5	6.5	6.5	245.44	19.975	E7EVA0;P27816;H0Y2V1;F8W9U4;H7C4C5;A0A0J9YVV8;A0A0J9YW37;H7C456;B5MEG9	Microtubule-associated protein;Microtubule-associated protein 4	MAP4
20.4192	21.0456	21.2383	NaN	NaN	20.8497	19.7994	21.2077	NaN	NaN	NaN	21.7642	mTOR signaling pathway;RNA transport	3	3	3	31.2	31.2	31.2	19.372	12.859	F8W0K0;F8VYE9;F8VSC7;F8VP89;F8VX11;E7EX17;P23588;F8VRU1	Eukaryotic translation initiation factor 4B	EIF4B
23.8724	23.851	23.8863	20.7928	23.5001	22.3168	22.9675	23.472	22.2642	21.0536	22.2538	21.8133		3	3	3	59.2	59.2	59.2	7.813	47.845	F8W1N5;F8VZJ2;F8VNW4;F8W0W4;H0YHX9;Q13765;E9PAV3;F8VZ58;Q9BZK3	Nascent polypeptide-associated complex subunit alpha;Nascent polypeptide-associated complex subunit alpha, muscle-specific form	NACA
23.1886	23.1515	23.2569	21.4818	20.917	21.4693	22.6523	23.8085	23.4633	22.5983	22.2126	23.7495		11	11	11	28.9	28.9	28.9	44.643	29.218	E9PBF6;P20700;A0A0D9SFE5;A0A0D9SFY5	Lamin-B1	LMNB1
21.0677	20.756	21.1434	NaN	NaN	NaN	NaN	21.1549	NaN	NaN	NaN	20.1946	Purine metabolism	2	2	2	10.9	10.9	10.9	45.651	12.795	E9PBS1;P22234;D6RF62	Multifunctional protein ADE2;Phosphoribosylaminoimidazole-succinocarboxamide synthase;Phosphoribosylaminoimidazole carboxylase	PAICS
NaN	NaN	NaN	NaN	NaN	NaN	21.2633	21.4983	NaN	NaN	NaN	NaN	Glycerolipid metabolism	1	1	1	10.2	10.2	10.2	26.925	3.8623	E9PG39;E9PC15;Q53H12	Acylglycerol kinase, mitochondrial	AGK
19.1978	19.2992	NaN	20.7752	19.6447	18.6937	NaN	19.0424	NaN	18.0793	NaN	NaN	Citrate cycle (TCA cycle);Lysine degradation;Tryptophan metabolism	4	4	4	4.5	4.5	4.5	117.24	12.666	E9PDF2;E9PCR7;Q02218;E9PFG7;A0A0D9SFS3;C9J4G7	2-oxoglutarate dehydrogenase, mitochondrial	OGDH
23.0891	21.6641	20.8605	21.2371	19.9611	NaN	21.2253	20.5746	20.264	NaN	NaN	16.626		9	8	7	15.9	14.8	13.4	68.903	12.502	E9PEB5;Q96AE4;C9JSZ1	Far upstream element-binding protein 1	FUBP1
19.7627	19.9131	20.0151	NaN	NaN	19.24	NaN	20.8773	20.0834	NaN	NaN	NaN	RNA transport	2	2	2	3.7	3.7	3.7	148.09	4.6905	E9PF10;O75694;D6RA13	Nuclear pore complex protein Nup155	NUP155
20.5065	NaN	20.8052	NaN	20.1796	20.6851	19.8118	NaN	NaN	NaN	18.3866	19.926	Phagosome;Vasopressin-regulated water reabsorption	1	1	1	4.7	4.7	4.7	43.193	7.7213	E9PHI6;Q9Y6G9	Cytoplasmic dynein 1 light intermediate chain 1	DYNC1LI1
22.7105	22.5118	23.2728	23.6528	NaN	22.1336	NaN	NaN	NaN	22.454	21.883	21.5207		9	9	9	41	41	41	28.821	40.727	E9PK01;P29692;A0A087X1X7;E9PRY8;E9PMW7;E9PPR1;E9PL12;E9PQ49;E9PI39;E9PIZ1;H0YCK7;E9PN91;E9PL71;E9PQZ1;E9PK72;E9PK06;E9PQC9;E9PKK3;H0YE58;H0YE72;E9PNW6;E9PJD0	Elongation factor 1-delta	EEF1D
20.9331	NaN	21.5221	20.0734	NaN	20.8771	NaN	NaN	NaN	18.3575	NaN	20.4832	Proteasome	3	3	3	16.7	16.7	16.7	34.614	8.561	E9PKD5;E9PM69;R4GNH3;P17980;E9PMD8;E9PLG2;E9PN50	26S protease regulatory subunit 6A	PSMC3
21.3926	22.2673	20.304	17.7082	NaN	21.4171	NaN	21.0942	20.6167	NaN	20.8461	22.1465	Ribosome	3	3	3	17.1	17.1	17.1	22.389	10.935	E9PKZ0;P62917;G3V1A1;E9PKU4;E9PP36	60S ribosomal protein L8	RPL8
20.6857	22.5752	NaN	NaN	21.0552	NaN	NaN	20.155	NaN	NaN	NaN	NaN		2	2	2	34.5	34.5	34.5	15.779	6.2018	E9PL10;Q96K17	Transcription factor BTF3;Transcription factor BTF3 homolog 4	BTF3L4
19.9736	20.1763	20.8203	20.7151	NaN	NaN	NaN	18.9866	19.873	18.8058	20.4426	20.3636		4	1	1	40.2	10.1	10.1	18.483	9.3341	E9PLD0;Q9H0U4;Q92928;A0A087WTI1	Ras-related protein Rab-1B;Putative Ras-related protein Rab-1C	RAB1B;RAB1C
21.8517	22.2548	22.0086	19.5502	23.1579	22.2206	20.8488	20.7453	19.9175	NaN	21.322	21.1175		6	6	6	11.5	11.5	11.5	102.99	26.554	E9PLK3;P55786;H0YDG0;A6NEC2;E9PJY4;E9PPD4;E9PP11	Puromycin-sensitive aminopeptidase	NPEPPS
19.1172	22.4177	NaN	NaN	NaN	22.9565	NaN	20.54	NaN	NaN	17.8634	22.8729	Ribosome	5	5	5	42.6	42.6	42.6	12.201	16.781	E9PLL6;P46776;E9PJD9;E9PLX7	60S ribosomal protein L27a	RPL27A
NaN	19.1167	19.8023	21.2391	NaN	19.9901	NaN	19.6188	19.2581	19.2911	18.5773	21.7575	Spliceosome	7	7	7	13.8	13.8	13.8	98.169	7.4735	E9PPJ0;Q13435;A0A087WZZ5;E9PJT3;H0YEX5;E9PJ04;H0YCG1	Splicing factor 3B subunit 2	SF3B2
22.275	22.7234	22.7798	20.058	22.1102	21.5033	21.5938	22.5449	22.7204	20.0307	21.2441	NaN		6	6	1	59.8	59.8	18.9	14.384	20.646	Q5JR07;E9PQH6;Q5JR08;Q5JR05;P08134;Q5JR06;E9PN11;U3KQA9;U3KQV3;E9PLA2	Rho-related GTP-binding protein RhoC	RHOC
NaN	NaN	NaN	NaN	NaN	NaN	19.0275	19.5999	19.7127	NaN	NaN	NaN	RNA transport	1	1	1	1.6	1.6	1.6	127.33	2.5933	E9PR16;G3V198;Q12769	Nuclear pore complex protein Nup160	NUP160
NaN	23.1671	NaN	20.6979	20.5913	21.0425	20.5744	22.3674	21.7809	NaN	21.5276	NaN		1	1	1	10.2	10.2	10.2	10.905	1.3893	E9PR30;P62861	40S ribosomal protein S30	FAU
NaN	NaN	NaN	20.0192	20.9054	NaN	NaN	NaN	NaN	NaN	21.2148	18.6063	Pentose phosphate pathway	3	3	3	11.3	11.3	11.3	35.328	8.9701	F2Z393;P37837	Transaldolase	TALDO1
20.6234	20.4072	20.6953	NaN	NaN	NaN	NaN	NaN	NaN	NaN	NaN	NaN		1	1	1	6.2	6.2	6.2	28.05	5.3219	F5GYN4;J3KR44;F5H6Q1;F5GYJ8;Q96FW1	Ubiquitin thioesterase OTUB1	OTUB1
NaN	NaN	NaN	NaN	19.6737	NaN	NaN	NaN	NaN	17.5692	18.5099	NaN	Glycerophospholipid metabolism	2	2	2	6.6	6.6	6.6	41.512	2.6366	F5GYK7;P43304	Glycerol-3-phosphate dehydrogenase;Glycerol-3-phosphate dehydrogenase, mitochondrial	GPD2
18.7669	NaN	22.2265	19.4639	19.0712	NaN	20.7005	NaN	21.5572	19.5278	NaN	NaN	Protein digestion and absorption	3	3	3	7.2	7.2	7.2	64.872	11.204	F5GZS6;J3KPF3;P08195;H0YFX4;F5GZI0	4F2 cell-surface antigen heavy chain	SLC3A2
22.2982	22.2766	20.1727	19.6415	21.0626	20.1837	19.3957	21.2656	NaN	NaN	NaN	21.9474	One carbon pool by folate	8	8	8	11.4	11.4	11.4	110.61	13.913	F5H2F4;P11586;V9GYY3	C-1-tetrahydrofolate synthase, cytoplasmic;Methylenetetrahydrofolate dehydrogenase;Methenyltetrahydrofolate cyclohydrolase;Formyltetrahydrofolate synthetase;C-1-tetrahydrofolate synthase, cytoplasmic, N-terminally processed	MTHFD1
21.8785	21.4108	NaN	NaN	NaN	NaN	NaN	NaN	NaN	NaN	NaN	NaN	Dorso-ventral axis formation	1	1	1	7.9	7.9	7.9	18.319	1.5578	F5H889;F5H2F7;Q96J94	Piwi-like protein 1	PIWIL1
NaN	NaN	NaN	NaN	NaN	NaN	NaN	NaN	NaN	20.3791	21.4883	NaN	Glycosaminoglycan degradation;Lysosome	1	1	1	4.8	4.8	4.8	28.45	9.8876	F5H4C6;H7C3P4;F6S8M0;P15586	N-acetylglucosamine-6-sulfatase	GNS
24.9388	25.3184	25.4055	21.8097	21.3225	23.8769	24.4679	25.078	23.9565	22.2864	22.3085	24.7115		8	8	8	38.8	38.8	38.8	43.867	53.392	F8W0J6;F5H4R6;H0YIV4;P55209;F8VY35;F8VV59;B7Z9C2;H0YHC3;F8W020;F8W118;F8VUX1;F8W543;H0YH88;F8VXI6;F8VRJ2;F8VVB5;B7Z4K9	Nucleosome assembly protein 1-like 1	NAP1L1
23.3272	23.612	24.1422	21.4714	21.7188	20.9401	NaN	NaN	21.8479	NaN	23.272	22.6333	Gap junction;Pathogenic Escherichia coli infection;Phagosome	20	1	1	53	4.6	4.6	57.73	3.3269	F5H5D3;Q9BQE3;F8VVB9;F8VRZ4;F8VS66;F8VWV9;F8VX09;C9JDL2;C9JEV8;C9JQ00;C9JJQ8;C9K0S6;F8VRK0;F8VXZ7;F8W0F6;Q9H853	Tubulin alpha-1C chain	TUBA1C;TUBA1B
19.3983	NaN	21.686	NaN	NaN	NaN	18.8247	21.0479	21.9885	NaN	NaN	20.549		2	2	2	12.7	12.7	12.7	47.27	4.429	H0Y8R1;F5H5I6;H0YAK1;Q12849	G-rich sequence factor 1	GRSF1
NaN	21.3155	NaN	20.7914	NaN	NaN	NaN	21.2382	21.1143	19.1272	20.6306	NaN		2	2	2	8.2	8.2	8.2	58.772	4.2417	F5H6I7;Q6DD88	Atlastin-3	ATL3
NaN	20.8252	NaN	NaN	18.815	20.5895	NaN	NaN	20.3289	NaN	NaN	NaN	mRNA surveillance pathway;RNA transport;Spliceosome	1	1	1	16.7	16.7	16.7	10.715	1.614	F5H6N1;P61326;Q96A72	Protein mago nashi homolog;Protein mago nashi homolog 2	MAGOHB;MAGOH
NaN	19.2532	NaN	NaN	20.2337	NaN	20.1028	20.3486	19.9333	NaN	18.0878	NaN		1	1	1	18.9	18.9	18.9	8.2139	2.9602	G3V1U5;F5H6U7;Q9Y3E0	Vesicle transport protein GOT1B	GOLT1B
NaN	20.4301	21.0098	NaN	NaN	19.7492	19.8492	20.0041	19.9724	NaN	20.7297	20.2454		2	2	2	24.4	24.4	24.4	15.397	8.4663	F6RFD5;P60981	Destrin	DSTN
20.713	NaN	NaN	NaN	NaN	NaN	20.3028	19.4965	NaN	NaN	NaN	NaN	Alanine, aspartate and glutamate metabolism;Pyrimidine metabolism	3	3	3	1.6	1.6	1.6	236.02	3.6595	F8VPD4;P27708;H7C3Z5;H7BZB3	CAD protein;Glutamine-dependent carbamoyl-phosphate synthase;Aspartate carbamoyltransferase;Dihydroorotase	CAD
19.7572	NaN	18.0773	NaN	NaN	NaN	NaN	NaN	NaN	NaN	NaN	NaN		2	2	2	6.8	6.8	6.8	48.876	3.3511	F8VRR3;F8VQZ7;P50579;G3V1U3	Methionine aminopeptidase 2	METAP2
21.3389	22.5123	NaN	NaN	NaN	22.0537	NaN	NaN	NaN	NaN	NaN	NaN	Ubiquitin mediated proteolysis	2	2	2	40.2	40.2	40.2	9.7441	3.6135	F8VZ29;F8VSD4;F8VV71;P61088	Ubiquitin-conjugating enzyme E2 N	UBE2N
21.7699	20.9962	20.7453	23.3265	22.1011	20.0889	17.8607	20.3888	21.6734	22.5921	20.9893	20.6708		5	5	5	22.5	22.5	22.5	36.161	26.975	F8VVM2;Q00325;F8VWQ0;F8VZL5;F8VWR4	Phosphate carrier protein, mitochondrial	SLC25A3
NaN	NaN	NaN	NaN	19.1544	NaN	NaN	NaN	NaN	NaN	19.2737	19.8724	Focal adhesion;Long-term potentiation;Regulation of actin cytoskeleton;Vascular smooth muscle contraction	2	2	2	3.3	3.3	3.3	76.532	6.5914	F8VZN8;O14974	Protein phosphatase 1 regulatory subunit 12A	PPP1R12A
19.5659	19.3699	20.0207	20.4244	NaN	NaN	NaN	NaN	20.234	20.2124	19.7618	18.1428		3	3	3	13.6	13.6	13.6	24.105	3.9546	F8VZQ9;H0YHG0;P82979	SAP domain-containing ribonucleoprotein	SARNP
24.6902	24.8299	25.1583	23.2597	24.2637	24.2746	23.8266	24.6726	24.2156	22.2619	23.7466	23.533		8	8	6	44.9	44.9	34.6	31.6	50.425	H3BRU6;F8VZX2;Q15366;F8VXH9;F8W0G4;F8W1G6;J3QT27;E9PFP8;P57721;H3BND9;H3BSS4;F8VRH0;F8VTZ0	Poly(rC)-binding protein 2	PCBP2
NaN	NaN	NaN	19.4447	19.686	NaN	NaN	20.6624	21.0033	22.0999	NaN	NaN		4	3	3	23.2	19.8	19.8	29.224	13.054	F8W031;F8VXJ7;Q9Y2B0;F8W1K5;F8VP03;H0YIH9;H0YI18;F8W1U5	Protein canopy homolog 2	CNPY2
NaN	NaN	NaN	18.2723	NaN	19.7859	20.5642	21.3781	20.8258	21.5445	NaN	20.2915	Purine metabolism	8	8	8	44	44	44	25.63	20.715	F8W1A4;P54819;F8VZG5;F8VY04;G3V213;F8VPP1	Adenylate kinase 2, mitochondrial;Adenylate kinase 2, mitochondrial;Adenylate kinase 2, mitochondrial, N-terminally processed	AK2
26.1896	26.3454	26.2917	24.816	24.4102	22.6737	25.7965	26.5916	26.9281	25.6095	25.202	24.3516	Spliceosome	15	15	14	42	42	42	33.155	127.55	F8W6I7;P09651;F8VZ49;Q32P51;F8VTQ5;F8W646;F8VYN5;H0YH80	Heterogeneous nuclear ribonucleoprotein A1;Heterogeneous nuclear ribonucleoprotein A1, N-terminally processed;Heterogeneous nuclear ribonucleoprotein A1-like 2	HNRNPA1;HNRNPA1L2
20.0383	NaN	20.8922	NaN	NaN	NaN	NaN	NaN	19.7042	NaN	NaN	19.9174		2	2	2	2.8	2.8	2.8	113.63	4.8406	F8W726;Q14157;Q5VU77	Ubiquitin-associated protein 2-like	UBAP2L
23.3814	24.2625	24.9146	23.479	23.0017	23.383	21.3442	22.6515	24.8338	22.0863	21.6594	23.0769		5	5	5	25.8	25.8	25.8	37.144	24.15	F8W914;Q9NQC3;H7C106;A0A0U1RQR6	Reticulon;Reticulon-4	RTN4
20.6367	NaN	NaN	NaN	NaN	NaN	NaN	20.4919	NaN	NaN	20.7258	18.1755	mRNA surveillance pathway	4	4	4	14.2	14.2	14.2	52.269	13.722	F8WJN3;Q16630;F8W084	Cleavage and polyadenylation specificity factor subunit 6	CPSF6
NaN	NaN	NaN	NaN	NaN	NaN	20.1407	NaN	NaN	19.4059	19.6999	NaN		5	5	5	16.5	16.5	16.5	54.191	10.266	G3V0E4;O75439;F8WAZ6	Mitochondrial-processing peptidase subunit beta	PMPCB
NaN	NaN	NaN	NaN	NaN	NaN	20.6217	NaN	21.532	18.3722	NaN	NaN	Alzheimer's disease;Huntington's disease;Oxidative phosphorylation;Parkinson's disease	3	3	3	13.1	13.1	13.1	50.054	3.6933	G3V0I5;P49821;H0YE81;B4DE93;E9PPS5;E9PLC6;E9PQP1	NADH dehydrogenase [ubiquinone] flavoprotein 1, mitochondrial	NDUFV1
20.1981	19.3576	20.7702	17.0495	20.3615	NaN	NaN	19.3367	NaN	NaN	20.1652	NaN		1	1	1	3.5	3.5	3.5	57.56	3.7516	G3V1C3;Q9BZZ5	Apoptosis inhibitor 5	API5
23.3724	24.105	17.5319	23.2385	NaN	19.3878	NaN	23.1598	22.1384	19.9748	18.8015	22.973	Ribosome	5	5	5	35.4	35.4	35.4	18.756	30.372	G3V203;H0YHA7;J3QQ67;Q07020;F8VUA6;F8VYV2;A0A075B7A0	60S ribosomal protein L18	RPL18
NaN	NaN	NaN	20.4974	21.6482	20.6574	NaN	NaN	NaN	20.3658	20.9675	NaN	Proteasome	4	4	4	28.4	28.4	28.4	16.645	12.374	G3V3I1;G3V295;G3V5Z7;P60900;G3V3U4	Proteasome subunit alpha type;Proteasome subunit alpha type-6	PSMA6
21.8559	22.5223	NaN	NaN	NaN	21.3176	19.1555	NaN	NaN	NaN	NaN	21.0475		3	3	2	33.3	33.3	23.8	12.019	4.8665	G3V2F7;I3L0A0;Q13404;A0A0A0MSL3;E5RIF1;D6RG00;H0YBX6	Ubiquitin-conjugating enzyme E2 variant 1	UBE2V1;TMEM189-UBE2V1
NaN	21.3793	21.6356	19.0667	20.4698	21.6729	NaN	NaN	NaN	19.1153	20.4733	21.0613		3	3	3	41.1	41.1	41.1	10.031	6.726	H0YJ63;G3V438;H0YJG7;O95433	Activator of 90 kDa heat shock protein ATPase homolog 1	AHSA1
NaN	NaN	NaN	NaN	NaN	NaN	NaN	17.4014	18.0598	NaN	18.3943	NaN	Acute myeloid leukemia;Aldosterone-regulated sodium reabsorption;Axon guidance;B cell receptor signaling pathway;Bladder cancer;Chemokine signaling pathway;Chronic myeloid leukemia;Colorectal cancer;Dorso-ventral axis formation;Endocytosis;Endometrial cancer;ErbB signaling pathway;Fc epsilon RI signaling pathway;Focal adhesion;Gap junction;Glioma;GnRH signaling pathway;Hepatitis C;Insulin signali…	1	1	1	25.6	25.6	25.6	4.6674	2.0629	G3V4K2;G3V5T7;P01116;P01112;P01111	GTPase KRas;GTPase KRas, N-terminally processed;GTPase HRas;GTPase HRas, N-terminally processed;GTPase NRas	KRAS;HRAS;NRAS
NaN	NaN	19.8945	NaN	NaN	15.923	NaN	NaN	NaN	16.9883	19.521	19.3468	Hepatitis C;Measles;Protein processing in endoplasmic reticulum;RNA transport	4	4	4	18.3	18.3	18.3	28.865	6.7799	H0YJS4;G3V4T5;P05198	Eukaryotic translation initiation factor 2 subunit 1	EIF2S1
20.3164	20.8156	NaN	NaN	NaN	NaN	NaN	NaN	NaN	NaN	NaN	NaN	Cell cycle - yeast;RNA transport	2	2	2	39.4	39.4	39.4	12.558	7.8441	G3V5T6;H0YJ77;H0YJX6;O14744;G3V2L6	Protein arginine N-methyltransferase 5;Protein arginine N-methyltransferase 5, N-terminally processed	PRMT5
20.3086	NaN	NaN	NaN	NaN	NaN	NaN	NaN	NaN	NaN	19.8834	17.7799	Adherens junction;Arrhythmogenic right ventricular cardiomyopathy (ARVC);Bacterial invasion of epithelial cells;Endometrial cancer;Leukocyte transendothelial migration;Pathways in cancer;Tight junction	2	2	2	4.8	4.8	4.8	92.721	7.526	G3XAM7;P35221;E5RJZ2;E5RIT8;E5RFM3;E5RJL0;E5RIE0;E5RHV7;E5RGY6;E5RG03;E5RIB1	Catenin alpha-1	CTNNA1
23.1827	23.1515	23.6426	22.9755	23.2158	24.1475	21.8239	22.2838	22.0984	21.4062	19.4113	23.109	Vascular smooth muscle contraction	6	6	6	55.3	55.3	55.3	17.089	30.071	G8JLA2;F8W1R7;J3KND3;G3V1V0;B7Z6Z4;P60660;F8VPF3;F8VZU9;G3V1Y7;F8W180;F8VXL3;F8W1I5;P14649;H0YI43	Myosin light polypeptide 6	MYL6
23.9538	23.6932	23.4118	24.5459	21.1165	16.9685	20.3392	23.5381	22.8049	24.2786	23.1013	22.6228		9	9	4	28.8	28.8	13.3	51.229	66.98	G8JLB6;P31943;E9PCY7;H0YB39;E5RGV0;D6RIT2;D6RIU0;H0YBG7;H0YBD7;D6RBM0;E5RGH4;E7EQJ0;D6RAM1;D6R9T0;D6RFM3;D6RDU3;D6RJ04;D6RIH9;H0YAQ2;E7EN40;D6R9D3;D6RF17;D6RDL0	Heterogeneous nuclear ribonucleoprotein H;Heterogeneous nuclear ribonucleoprotein H, N-terminally processed	HNRNPH1
20.6834	20.127	NaN	19.4289	20.4374	NaN	NaN	NaN	NaN	NaN	21.2509	NaN	Bacterial invasion of epithelial cells;Endocrine and other factor-regulated calcium reabsorption;Endocytosis;Fc gamma R-mediated phagocytosis	6	6	6	13.2	13.2	13.2	79.621	31.437	G8JLD5;O00429;F8VZ52;H0YI79;H0YHY4;F8VR28;F8VYL3;B4DPZ9;F8W1W3;F8VUJ9;B4DDQ3	Dynamin-1-like protein	DNM1L
NaN	NaN	NaN	NaN	NaN	19.426	NaN	NaN	NaN	NaN	20.5851	18.6613	Acute myeloid leukemia;Adipocytokine signaling pathway;Chemokine signaling pathway;Hepatitis C;Jak-STAT signaling pathway;ko05152;Measles;Pancreatic cancer;Pathways in cancer;Toxoplasmosis	2	2	2	6.5	6.5	6.5	76.138	5.3547	G8JLH9;P40763	Signal transducer and activator of transcription;Signal transducer and activator of transcription 3	STAT3
NaN	NaN	NaN	NaN	NaN	NaN	NaN	NaN	NaN	21.6712	19.4273	NaN		4	4	4	17.4	17.4	17.4	45.294	8.5855	H0Y512;Q9HDC9	Adipocyte plasma membrane-associated protein	APMAP
NaN	NaN	NaN	NaN	21.5455	NaN	21.0306	20.8767	NaN	20.4917	20.6554	NaN	ECM-receptor interaction;Hematopoietic cell lineage;Shigellosis	3	3	3	15	15	15	22.683	5.7684	H0YD13;H0YDW7;H0YCV9;H0Y5E4;P16070;E9PKC6;H0YDX6;H0YD17;H0Y2P0;Q86UZ1	CD44 antigen	CD44
NaN	22.166	NaN	23.0817	NaN	NaN	20.5067	21.3056	21.968	21.8984	NaN	21.0722	Spliceosome	4	4	4	55.1	55.1	55.1	8.6098	18.729	H3BR27;H0Y6E7;H3BT71;P38159;H3BNC1;Q96E39;O75526;Q8N7X1	RNA-binding motif protein, X chromosome;RNA-binding motif protein, X chromosome, N-terminally processed;RNA binding motif protein, X-linked-like-1;RNA-binding motif protein, X-linked-like-2	RBMX;RBMXL1;RBMXL2
24.0204	24.5201	24.6629	24.0917	21.7498	22.3593	20.972	21.9452	22.1658	23.44	23.812	24.4349	Alzheimer's disease;Calcium signaling pathway;Gastric acid secretion;Glioma;GnRH signaling pathway;Insulin signaling pathway;ko05152;Long-term potentiation;Melanogenesis;Neurotrophin signaling pathway;Olfactory transduction;Oocyte meiosis;Phosphatidylinositol signaling system;Phototransduction;Phototransduction - fly;Plant-pathogen interaction;Salivary secretion;Vascular smooth muscle contraction	6	6	6	56.1	56.1	56.1	20.762	67.91	H0Y7A7;P62158;E7ETZ0;E7EMB3;Q96HY3;M0QZ52;G3V361;F8WBR5;G3V479;G3V226	Calmodulin	CALM2;CALM1;CALM3
23.9688	23.5532	23.5592	24.6114	23.7221	22.9667	23.2605	23.7539	24.1417	24.6899	22.9964	23.4198		9	9	8	41.4	41.4	37.6	23.811	36.032	H0YA96;H0Y8G5;Q14103;D6RAF8;D6RF44;D6RBQ9;D6RD83	Heterogeneous nuclear ribonucleoprotein D0	HNRNPD
NaN	NaN	NaN	NaN	NaN	NaN	18.2372	NaN	20.83	NaN	NaN	NaN	Cytosolic DNA-sensing pathway;Measles	2	2	2	1.9	1.9	1.9	132.65	1.9235	H0YCK3;P55265	Double-stranded RNA-specific adenosine deaminase	ADAR
20.9312	20.9018	21.3757	NaN	20.6484	22.7113	21.0632	20.5165	NaN	NaN	NaN	NaN	RNA transport	2	2	2	30	30	30	10.807	18.616	H0YDT6;O00303	Eukaryotic translation initiation factor 3 subunit F	EIF3F
NaN	NaN	NaN	NaN	NaN	NaN	NaN	NaN	NaN	NaN	18.5612	21.3332		2	2	2	25	25	25	20.6	11.188	H0YFA4;P52943	Cysteine-rich protein 2	CRIP2
NaN	NaN	NaN	NaN	20.8098	22.5551	NaN	NaN	NaN	NaN	NaN	21.5871	Fructose and mannose metabolism	1	1	1	17.1	17.1	17.1	12.71	2.5338	H0YKB3;Q00796	Sorbitol dehydrogenase	SORD
22.7102	23.1782	NaN	NaN	NaN	20.2335	NaN	NaN	NaN	NaN	NaN	18.5061	Pyrimidine metabolism	4	4	4	32.9	32.9	32.9	17.827	7.9493	H0YNW5;H0YKC5;P33316;H0YMM5;A0A0C4DGL3;H0YNJ9;H0YKI0;H0YMP1	Deoxyuridine 5-triphosphate nucleotidohydrolase, mitochondrial	DUT
NaN	22.042	NaN	19.6533	NaN	21.7985	NaN	21.9401	20.9129	18.2136	NaN	21.2665	Ribosome	3	3	3	28.1	28.1	28.1	9.657	4.9844	H0YLP6;H0YMF4;H0YKD8;P46779	60S ribosomal protein L28	RPL28
20.4639	NaN	NaN	21.3192	NaN	NaN	NaN	NaN	NaN	19.4745	20.7643	NaN	Proteasome	3	3	3	32.2	32.2	32.2	19.654	8.4155	H0YLC2;H0YKT8;H0YMA1;H0YMZ1;H0YN18;H0YL69;P25789;H0YLS6;H0YMV3;H0YKS0;H0YMI6	Proteasome subunit alpha type;Proteasome subunit beta type;Proteasome subunit alpha type-4	PSMA4
NaN	21.7316	21.2117	20.9065	NaN	NaN	NaN	NaN	NaN	20.3165	NaN	21.2615	Protein export	1	1	1	12.2	12.2	12.2	13.058	32.561	H0YLA2;P37108	Signal recognition particle 14 kDa protein	SRP14
NaN	NaN	NaN	NaN	18.7784	18.4564	NaN	NaN	NaN	NaN	NaN	NaN		2	2	2	8.3	8.3	8.3	33.154	2.7166	H0YN07;H0YMR4;Q8TEX9;H0YN14	Importin-4	IPO4
23.92	23.7723	21.7126	22.9036	21.6352	22.2847	19.4945	21.8433	18.5524	21.975	22.6877	22.3773		6	6	4	41.2	41.2	37.3	19.997	47.851	H0YN26;P39687;H7BZ09;O43423	Acidic leucine-rich nuclear phosphoprotein 32 family member A	ANP32A
21.1884	21.2029	NaN	NaN	19.7904	NaN	20.0699	NaN	21.3065	NaN	18.915	21.0941	RNA transport	1	1	1	22.8	22.8	22.8	15.23	7.9864	H3BV11;H3BRI8;H3BM93;H3BVG0;Q8N1F7	Nuclear pore complex protein Nup93	NUP93
21.9912	22.5747	20.6898	22.1654	21.7107	20.8381	20.1596	21.902	21.5015	20.1643	21.2034	21.4038		4	4	1	17.3	17.3	4.2	27.168	18.674	H3BN98;I3L246;H3BV27;H3BT37;I3L303;H3BPJ2;Q15041		RPS15A
21.5529	21.6276	22.1003	18.5797	NaN	NaN	NaN	18.9162	NaN	17.2116	NaN	20.7865		3	3	3	27	27	27	17.047	39.252	H3BPF6;Q99471;H3BMQ1	Prefoldin subunit 5	PFDN5
NaN	NaN	NaN	NaN	NaN	NaN	19.9139	NaN	19.7124	NaN	21.2484	NaN	Fatty acid metabolism	2	2	2	14.3	14.3	14.3	24.704	6.4296	H3BS70;Q96DC0;P42126	Enoyl-CoA delta isomerase 1, mitochondrial	ECI1;DCI
NaN	NaN	NaN	NaN	16.0608	NaN	NaN	NaN	NaN	NaN	17.5879	19.7426		3	3	3	4.5	4.5	4.5	130.55	2.3874	H7BXY3;Q7L2E3	Putative ATP-dependent RNA helicase DHX30	DHX30
21.9706	23.1564	21.8306	NaN	20.9065	21.9312	NaN	NaN	NaN	NaN	NaN	16.1337	Methane metabolism	4	4	4	39.1	39.1	39.1	25.368	6.5541	H7BZT7;X6RA14;P10768;U3KQT1	S-formylglutathione hydrolase	ESD
NaN	20.8688	NaN	NaN	NaN	NaN	20.9483	21.5143	21.1146	NaN	NaN	NaN	mRNA surveillance pathway;RNA transport	1	1	1	11.2	11.2	11.2	16.036	3.6168	H7BZW6;X6RAL5;O00422	Histone deacetylase complex subunit SAP18	SAP18
18.7033	22.3391	NaN	NaN	NaN	18.7206	NaN	NaN	NaN	NaN	19.9257	18.8585		2	2	2	29.4	29.4	29.4	18.881	6.8381	H7C4F6;O00629	Importin subunit alpha-3	KPNA4
18.4814	NaN	NaN	NaN	NaN	19.1875	NaN	21.3769	19.4892	NaN	NaN	20.6928		4	4	4	6.4	6.4	6.4	140.13	14.811	I3L1L3;Q9BQG0;I3L2H8	Myb-binding protein 1A	MYBBP1A
19.7492	20.7503	20.8773	18.3915	NaN	NaN	NaN	NaN	NaN	16.9888	NaN	NaN	Bacterial invasion of epithelial cells;Chemokine signaling pathway;Chronic myeloid leukemia;ErbB signaling pathway;Fc gamma R-mediated phagocytosis;Focal adhesion;Insulin signaling pathway;MAPK signaling pathway;Neurotrophin signaling pathway;Pathways in cancer;Regulation of actin cytoskeleton;Renal cell carcinoma;Shigellosis	1	1	1	7.6	7.6	7.6	25.503	2.8826	I3L297;P46108	Adapter molecule crk	CRK
19.5751	20.55	NaN	NaN	NaN	NaN	20.6236	23.1956	22.0769	NaN	NaN	NaN		4	4	4	21.6	21.6	21.6	33.9	19.172	I3L3U9;J3QSV6;O76021;I3L234;I3L3C4	Ribosomal L1 domain-containing protein 1	RSL1D1
NaN	NaN	NaN	NaN	NaN	20.9739	NaN	NaN	NaN	NaN	18.0939	19.2324		3	3	3	2.3	2.3	2.3	223.69	6.3012	J3KN16;Q5VYK3	Proteasome-associated protein ECM29 homolog	KIAA0368;ECM29
22.3249	22.0129	21.7659	19.8997	NaN	17.0961	NaN	NaN	NaN	19.3602	NaN	21.7003	Spliceosome	3	3	3	23.8	23.8	23.8	15.156	7.76	J3QL05;J3KP15;Q01130;Q9BRL6	Serine/arginine-rich splicing factor 2	SRSF2
23.9995	23.6317	23.7013	23.1234	22.9409	23.8187	22.5193	23.2888	21.8726	22.3927	20.6517	23.3369	Measles	9	9	9	53.1	53.1	53.1	30.104	30.922	J3KPE3;P63244;H0YAF8;D6RAC2;H0Y8W2;D6RHH4;H0YAM7;D6REE5;H0Y8R5;D6R9Z1;D6R9L0;D6RF23;D6RFX4;D6RAU2;E9PD14;D6RBD0;D6RFZ9;H0Y9P0;D6RHJ5;D6RDI0;D6RGK8;D6R909	Guanine nucleotide-binding protein subunit beta-2-like 1;Guanine nucleotide-binding protein subunit beta-2-like 1, N-terminally processed	GNB2L1
24.7845	25.2784	24.6639	25.1073	23.3176	24.055	23.7824	24.3724	25.1409	24.8631	23.8623	24.2816		10	10	10	40.9	40.9	40.9	33.239	77.182	J3KPX7;Q99623;F5GY37;F5GWA7;F5H3X6;F5H0C5;F5H2D2	Prohibitin-2	PHB2
NaN	NaN	NaN	18.2765	NaN	20.1117	NaN	NaN	NaN	NaN	NaN	17.8814		2	2	2	2.1	2.1	2.1	47.26	1.3841	J3KQA0;Q8N9I0;P21579	Synaptotagmin-2;Synaptotagmin-1	SYT1;SYT2
NaN	NaN	NaN	20.8526	NaN	21.5994	NaN	NaN	NaN	20.1196	NaN	23.113	Ribosome	1	1	1	61.9	61.9	61.9	2.559	10.104	J3KSP2;J3KT73;J3QL01;P63173	60S ribosomal protein L38	RPL38
23.259	NaN	22.4613	NaN	NaN	21.9164	NaN	NaN	NaN	NaN	NaN	21.5028		3	3	3	41.3	41.3	41.3	11.012	11.118	J3KT51;Q9UK76;J3KSH8	Hematological and neurological expressed 1 protein;Hematological and neurological expressed 1 protein, N-terminally processed	HN1
23.318	24.0002	NaN	23.4376	NaN	22.6508	20.6137	22.3402	22.6884	23.0096	21.6356	23.1458	Spliceosome	10	10	7	21	21	15.1	69.086	28.448	J3KTA4;P17844;J3QRQ7;J3KRZ1;J3KRX8;J3QSF1;J3QRN5;X6RLV5;J3QR02	Probable ATP-dependent RNA helicase DDX5	DDX5
21.5908	22.4374	18.0779	21.5667	NaN	NaN	NaN	17.6213	NaN	NaN	NaN	21.8752	Ribosome	2	2	2	13	13	13	23.134	14.629	J3QR09;J3KTE4;P84098;J3QL15	Ribosomal protein L19;60S ribosomal protein L19	RPL19
21.0739	22.1484	22.9642	20.0087	19.766	NaN	20.666	21.0287	22.4335	19.5556	19.8819	19.453	Spliceosome	5	5	5	22.5	22.5	22.5	28.329	6.3638	J3KTL2;Q07955;J3QQV5;J3KSW7;S4R3G0;J3KSR8;Q13242	Serine/arginine-rich splicing factor 1	SRSF1
NaN	22.4066	NaN	21.7843	18.0618	19.6652	NaN	22.4269	20.4597	NaN	20.2239	21.6259	Ribosome	6	6	6	38.3	38.3	38.3	12.63	14.234	J3QRI7;J3QQQ9;J3QQV1;P61254;J3KTJ8;E5RIT6;J3QRC4;Q9UNX3;J3KS10;J3KSS0;E5RHH1	60S ribosomal protein L26;60S ribosomal protein L26-like 1	RPL26;RPL26L1
21.3612	21.9072	22.9844	22.8391	NaN	20.8552	19.7332	21.7703	20.8644	21.6147	NaN	23.1025	Focal adhesion;Leukocyte transendothelial migration;Regulation of actin cytoskeleton;Tight junction;Vascular smooth muscle contraction	5	5	5	48.6	48.6	48.6	20.457	44.753	J3QRS3;P19105;O14950;J3KTJ1;P24844	Myosin regulatory light chain 12A;Myosin regulatory light chain 12B	MYL12A;MYL12B
NaN	20.1427	NaN	21.2973	18.0675	18.5116	NaN	18.9993	18.9354	NaN	NaN	19.2491	Ribosome	2	2	2	20.2	20.2	20.2	10.789	3.7522	J3QSB5;Q9Y3U8;J3KTD3	60S ribosomal protein L36	RPL36
NaN	23.1972	NaN	NaN	NaN	21.5966	NaN	20.8402	22.002	NaN	NaN	22.0793		1	1	1	9.4	9.4	9.4	13.999	2.4635	K7EM02;K7EIJ8;Q8IYT4	Katanin p60 ATPase-containing subunit A-like 2	KATNAL2
NaN	NaN	NaN	NaN	NaN	NaN	NaN	NaN	NaN	17.8205	20.0451	NaN		2	2	2	2.9	2.9	2.9	93.296	10.595	K7EJE8;K7EKE6;P36776;K7ER27	Lon protease homolog, mitochondrial	LONP1
24.8074	24.2886	NaN	NaN	NaN	20.1024	NaN	23.4257	24.6257	NaN	NaN	NaN	Systemic lupus erythematosus	4	1	1	41.7	24.2	24.2	14.914	10.015	K7EK07;P84243;Q6NXT2;Q16695;K7EMV3;K7EP01;B4DEB1;K7ES00	Histone H3;Histone H3.3;Histone H3.3C;Histone H3.1t	H3F3B;H3F3A;H3F3C;HIST3H3
20.4203	NaN	21.4764	NaN	NaN	NaN	20.2814	21.5072	21.9769	19.9922	20.5317	NaN	mRNA surveillance pathway	2	2	2	9.8	9.8	9.8	35.02	12.322	K7EQ02;K7EQ55;K7EK33;Q96EP5	DAZ-associated protein 1	DAZAP1
21.4104	22.3736	NaN	17.5424	22.4991	24.42	19.843	24.1824	23.2361	NaN	20.4547	24.6713	Ribosome	3	3	3	44.7	44.7	44.7	17.723	45.01	K7ELC2;P62841;K7EM56;A0A0B4J2B4;K7EJ78;S4R417;K7EQJ5;S4R456	40S ribosomal protein S15	RPS15
22.9259	23.2157	20.4475	23.1448	21.9454	NaN	NaN	24.0294	23.517	23.8897	20.2745	NaN	Protein processing in endoplasmic reticulum	7	7	7	12.3	12.3	12.3	60.192	14.477	K7ELL7;P14314;K7EPW7;K7EKX1;K7EJ70;A0A0C4DGP4	Glucosidase 2 subunit beta	PRKCSH
22.3634	NaN	21.9943	21.0612	NaN	23.4871	NaN	NaN	NaN	NaN	NaN	23.184	RNA transport	4	4	4	57.9	57.9	57.9	13.607	13.602	K7EM18;P41567;K7EQP2;O60739	Eukaryotic translation initiation factor 1	EIF1
21.7682	NaN	22.1553	NaN	19.1307	NaN	21.7178	21.9285	22.2566	NaN	21.0894	NaN	Spliceosome	3	3	3	14.7	14.7	14.7	33.901	16.927	K7ENG2;P26368	Splicing factor U2AF 65 kDa subunit	U2AF2
24.3882	23.8787	24.2689	21.5624	NaN	19.3229	20.8604	20.4832	20.1186	22.542	22.9373	23.7837		5	5	5	54	54	54	10.004	38.194	K7EQA1;O14737;K7ESJ4	Programmed cell death protein 5	PDCD5
23.1517	23.2886	22.702	20.1092	NaN	NaN	NaN	NaN	NaN	18.8237	21.1559	21.7008		2	2	2	13	13	13	27.435	8.1548	K7EQA9;Q16543;K7EIU0;K7EKQ2	Hsp90 co-chaperone Cdc37;Hsp90 co-chaperone Cdc37, N-terminally processed	CDC37
17.2972	21.2495	16.7717	NaN	NaN	NaN	NaN	16.2755	17.7855	NaN	19.2736	NaN	Spliceosome	3	3	3	44.9	44.9	44.9	8.7769	6.4881	K7ERG4;P62316	Small nuclear ribonucleoprotein Sm D2	SNRPD2
23.926	24.1347	24.1974	23.5487	20.0843	24.3063	23.453	25.3154	24.7833	23.822	22.5815	24.802		15	15	7	48.9	48.9	24.2	58.362	86.669	M0QXS5;P14866;M0R1W6;M0R076;M0QYL7;B4DVF8;H7C464	Heterogeneous nuclear ribonucleoprotein L	HNRNPL
20.191	21.3609	NaN	20.4759	16.8955	16.7479	NaN	20.3232	18.7168	NaN	NaN	20.0344	Ribosome	4	4	4	26.1	26.1	26.1	16.731	9.3997	Q8J015;M0QYS1;P40429;Q6NVV1	60S ribosomal protein L13a;Putative 60S ribosomal protein L13a protein RPL13AP3	RPL13a;RPL13A;RPL13AP3
NaN	18.9497	19.7175	16.5127	19.1555	21.6796	NaN	20.3553	20.1317	NaN	20.4109	20.6518		10	2	0	50.5	9.7	0	35.904	8.2966	M0QYT0
21.3622	19.358	NaN	19.4701	20.6526	NaN	NaN	NaN	NaN	NaN	20.9106	NaN	Ubiquitin mediated proteolysis	2	2	2	16.2	16.2	16.2	29.422	4.8561	M0QZS6;Q9UBE0	SUMO-activating enzyme subunit 1;SUMO-activating enzyme subunit 1, N-terminally processed	SAE1
24.6599	24.8273	23.4169	20.5413	22.5721	22.7628	21.2833	23.907	22.7948	21.4555	23.2815	23.1614	Ribosome	5	5	5	42.5	42.5	42.5	22.391	54.834	M0R0F0;P46782;M0R0R2;M0QZN2	40S ribosomal protein S5;40S ribosomal protein S5, N-terminally processed	RPS5
NaN	NaN	NaN	NaN	19.5283	21.1145	NaN	NaN	NaN	NaN	NaN	20.0081	Pentose phosphate pathway	1	1	1	15.6	15.6	15.6	18.912	5.9805	M0R0U3;M0R261;O95336	6-phosphogluconolactonase	PGLS
18.8037	22.3226	17.1115	20.0896	NaN	NaN	NaN	21.5334	18.3409	NaN	17.4269	22.2655	Ribosome	4	4	4	31.9	31.9	31.9	16.714	13.282	M0R3D6;M0R1A7;M0R117;Q02543;M0R0P7	60S ribosomal protein L18a	RPL18A
21.0542	21.4718	20.7203	NaN	19.6193	NaN	NaN	20.8555	20.5378	NaN	NaN	NaN		9	2	2	32.8	9.8	9.8	49.129	4.3624	O00148;K7ENP6;A0A0G2JHN7;K7EL56;K7EIL8;F6U6E2;K7EN69;F6S2B7;F6SXL5;F6QYI9;A0A0G2JJL7;K7EPJ3;F6R6M7;K7EQN7	ATP-dependent RNA helicase DDX39A	DDX39A
21.0153	20.8833	21.5132	19.2587	NaN	NaN	NaN	NaN	NaN	17.6038	NaN	NaN	Proteasome	2	2	2	5	5	5	52.904	11.952	O00232	26S proteasome non-ATPase regulatory subunit 12	PSMD12
25.5016	25.1294	25.213	22.5641	22.3355	20.6344	21.6833	22.5522	22.1946	NaN	23.5385	22.8641		9	9	9	43.2	43.2	43.2	26.922	49.176	O00299	Chloride intracellular channel protein 1	CLIC1
NaN	NaN	NaN	NaN	NaN	NaN	19.9488	22.0283	NaN	NaN	NaN	NaN	Alzheimer's disease;Huntington's disease;Oxidative phosphorylation;Parkinson's disease	2	2	2	27.2	27.2	27.2	9.3697	6.3406	O00483	Cytochrome c oxidase subunit NDUFA4	NDUFA4
NaN	NaN	NaN	NaN	NaN	NaN	18.5818	20.1773	NaN	NaN	NaN	19.6095		2	2	2	13.8	13.8	13.8	32.444	7.8787	O00560;G5EA09	Syntenin-1	SDCBP
NaN	20.5994	NaN	17.8183	NaN	20.3147	16.2406	22.2095	18.0604	NaN	NaN	19.6318	Ribosome biogenesis in eukaryotes	7	7	7	15.3	15.3	15.3	66.049	9.6629	O00567;Q5JXT2;H0Y653;H0YDU4	Nucleolar protein 56	NOP56
21.6918	21.7765	NaN	NaN	NaN	NaN	NaN	21.5521	22.5671	20.6731	20.6692	NaN	Alzheimer's disease;Huntington's disease;Oxidative phosphorylation;Parkinson's disease	2	2	2	15.4	15.4	15.4	17.417	3.4236	O14561;I3L505;H3BNK3	Acyl carrier protein, mitochondrial;Acyl carrier protein	NDUFAB1
20.6552	20.4461	19.5585	21.5719	20.3777	21.8376	NaN	NaN	NaN	20.7744	NaN	20.6718	Proteasome	5	5	5	25	25	25	27.887	13.744	O14818;Q8TAA3;A0A087WYS6;F5GY34;H0Y586	Proteasome subunit alpha type-7;Proteasome subunit alpha type-7-like	PSMA7;PSMA8
22.7889	22.7971	23.459	18.1585	22.581	21.338	22.3377	21.9489	20.1797	NaN	22.1501	20.6548	Ribosome biogenesis in eukaryotes;RNA transport	6	6	6	9.4	9.4	9.4	123.38	28.646	O14980;C9IZS4;C9JQ02;C9JV99;C9J673;C9JKM9;C9JF49;C9IYM2;H7BZC5;F8WF71	Exportin-1	XPO1
NaN	NaN	NaN	NaN	21.139	20.6425	NaN	NaN	NaN	NaN	20.4416	20.9969	Bacterial invasion of epithelial cells;Fc gamma R-mediated phagocytosis;Pathogenic Escherichia coli infection;Regulation of actin cytoskeleton;Shigellosis	2	2	2	8.1	8.1	8.1	40.949	5.4588	O15143;C9JM51;F8WEB3;C9JTT6;C9JBJ7;C9K057;C9J4Z7;F8VXW2;C9JEY1;C9JQM8;C9JFG9;C9J6C8	Actin-related protein 2/3 complex subunit 1B	ARPC1B
NaN	NaN	NaN	20.6219	18.701	20.4718	NaN	NaN	NaN	NaN	NaN	NaN		4	4	4	8.9	8.9	8.9	67.257	14.839	O15240	Neurosecretory protein VGF;Neuroendocrine regulatory peptide-1;Neuroendocrine regulatory peptide-2;Antimicrobial peptide VGF[554-577]	VGF
20.307	20.6343	20.5123	19.8865	NaN	NaN	21.0058	22.0615	22.0963	19.7521	21.7161	NaN		2	2	2	16.7	16.7	16.7	21.127	27.965	Q5T8U5;O15260	Surfeit locus protein 4	SURF4
20.7494	20.5752	18.0748	NaN	NaN	NaN	NaN	NaN	NaN	NaN	NaN	NaN		2	2	2	7	7	7	59.271	6.8144	O15355	Protein phosphatase 1G	PPM1G
NaN	21.0297	NaN	17.9129	21.3116	19.7238	21.0406	21.6123	20.6231	17.3791	18.457	19.2228	Spliceosome	5	5	5	9.2	9.2	9.2	90.932	15.986	O43143	Pre-mRNA-splicing factor ATP-dependent RNA helicase DHX15	DHX15
NaN	NaN	NaN	NaN	NaN	NaN	17.8517	18.9885	NaN	NaN	NaN	NaN	Spliceosome	1	1	1	2.7	2.7	2.7	58.449	1.4053	O43172	U4/U6 small nuclear ribonucleoprotein Prp4	PRPF4
NaN	NaN	19.8472	NaN	20.0544	18.6498	NaN	NaN	NaN	NaN	18.7316	NaN	Phagosome;Vasopressin-regulated water reabsorption	2	2	2	10.2	10.2	10.2	54.099	3.3427	O43237;J3KRZ2;J3KRI4;B4E2E0	Cytoplasmic dynein 1 light intermediate chain 2	DYNC1LI2
NaN	NaN	NaN	21.2115	NaN	NaN	18.2618	21.1241	18.804	21.2209	18.3932	NaN		10	5	5	19.9	12.3	12.3	70.942	20.701	O43390;B4DT28	Heterogeneous nuclear ribonucleoprotein R	HNRNPR
26.2035	26.1926	26.5941	26.602	26.1666	22.9048	23.8241	25.449	24.1881	25.3555	26.2386	19.6907	Adherens junction;Amoebiasis;Arrhythmogenic right ventricular cardiomyopathy (ARVC);Focal adhesion;Leukocyte transendothelial migration;Regulation of actin cytoskeleton;Systemic lupus erythematosus;Tight junction	38	38	26	59.5	59.5	44.9	104.85	250.43	O43707;F5GXS2;H7C144;P35609;Q08043;K7EJH8;A0A087WSZ2;G3V5M4;F6THM6;K7EP19;M0QZQ3;C9JY79;Q9H254	Alpha-actinin-4	ACTN4
20.6387	20.6675	20.3319	NaN	20.828	20.6743	NaN	NaN	18.9408	NaN	NaN	21.4626	Aminoacyl-tRNA biosynthesis	6	6	6	15.9	15.9	15.9	62.942	16.516	O43776;K7EJ19;K7EIU7;K7EQ35	Asparagine--tRNA ligase, cytoplasmic	NARS
NaN	NaN	NaN	NaN	NaN	20.3414	20.4666	21.0747	NaN	NaN	NaN	NaN	mRNA surveillance pathway	1	1	1	6.6	6.6	6.6	26.227	1.1898	O43809	Cleavage and polyadenylation specificity factor subunit 5	NUDT21
19.1965	19.6737	NaN	NaN	NaN	NaN	NaN	21.7197	NaN	NaN	NaN	NaN		2	2	2	9.7	9.7	9.7	51.84	14.572	O43818	U3 small nucleolar RNA-interacting protein 2	RRP9
22.3247	21.3067	21.9902	NaN	NaN	NaN	21.318	22.6537	20.2104	NaN	NaN	NaN		9	2	2	67.2	14.6	14.6	15.529	3.0936	O60361	Putative nucleoside diphosphate kinase	NME2P1
20.6751	21.388	20.0281	NaN	NaN	NaN	NaN	NaN	NaN	NaN	NaN	18.6642		4	4	4	36.4	36.4	36.4	18.762	4.8778	O60493;A0A087X0R6;Q9UMY4	Sorting nexin-3	SNX3
23.561	24.177	23.0953	23.375	NaN	18.3364	20.2528	21.8664	22.2451	23.7245	23.2666	22.6628		13	13	8	27.4	27.4	19.7	69.602	46.651	O60506;B7Z645;F6UXX1	Heterogeneous nuclear ribonucleoprotein Q	SYNCRIP
21.3722	23.042	22.2082	NaN	22.5929	23.2052	NaN	20.344	NaN	19.1437	22.7938	22.9268		9	9	9	40.6	40.6	40.6	47.074	37.164	O60664;K7ERZ3;K7EL96;K7ER39	Perilipin-3	PLIN3
21.4074	22.7214	21.9408	NaN	20.079	22.5078	19.4763	NaN	21.6034	NaN	NaN	21.0501	Protein processing in endoplasmic reticulum	5	5	5	26.7	26.7	26.7	45.745	22.939	O60884	DnaJ homolog subfamily A member 2	DNAJA2
20.9953	NaN	NaN	20.9436	21.4047	NaN	21.5356	19.8336	NaN	20.312	21.4543	20.8108		8	8	8	22.3	22.3	22.3	66.193	13.88	O75083;D6RD66	WD repeat-containing protein 1	WDR1
19.7419	20.6696	NaN	NaN	NaN	NaN	NaN	NaN	19.9448	NaN	NaN	NaN	Systemic lupus erythematosus	2	2	2	10.2	10.2	10.2	39.617	2.8215	O75367;D6RCF2;B4DJC3;Q9P0M6	Core histone macro-H2A.1;Histone H2A;Core histone macro-H2A.2	H2AFY;H2AFY2
22.1574	21.9852	22.7366	20.2251	23.327	20.8556	22.2637	22.4114	20.4938	NaN	20.1507	NaN	Focal adhesion;MAPK signaling pathway	20	15	15	13	10.3	10.3	278.16	39.962	O75369;E7EN95;H7C5L4;A0A0C4DGA1;A0A0A0MT44	Filamin-B	FLNB
20.95	NaN	NaN	NaN	18.899	NaN	22.3421	NaN	22.0587	19.5893	19.6552	15.8361		3	3	2	6.8	6.8	5.3	60.103	4.9975	O75475;H3BPQ6;M0R0J3;A0A024R216;Q9Y3E1;Q7Z4V5	PC4 and SFRS1-interacting protein	PSIP1
NaN	NaN	NaN	18.2797	NaN	NaN	19.735	21.0507	NaN	21.3051	20.5294	NaN	Alzheimer's disease;Huntington's disease;Oxidative phosphorylation;Parkinson's disease	5	5	5	27.3	27.3	27.3	30.241	14.62	O75489;E9PS48;E9PKL8;G3V194	NADH dehydrogenase [ubiquinone] iron-sulfur protein 3, mitochondrial	NDUFS3
21.1223	21.4792	21.8771	NaN	NaN	21.3413	21.7412	22.2832	21.7227	NaN	NaN	21.1117	Spliceosome	1	1	1	23.2	23.2	23.2	8.3294	2.5405	Q6IQ42;Q5JRI1;O75494	Serine/arginine-rich splicing factor 10	FUSIP1;SRSF10
21.5004	20.6017	20.7888	NaN	19.926	22.6541	NaN	NaN	NaN	NaN	20.1583	20.3691		2	2	2	39.5	39.5	39.5	8.5435	34.892	O75506	Heat shock factor-binding protein 1	HSBP1
21.7954	18.8823	NaN	17.9538	20.8354	NaN	21.3651	21.5011	21.0267	16.2623	21.5021	NaN	Spliceosome	8	8	8	10	10	10	145.83	13.847	O75533;H7C341	Splicing factor 3B subunit 1	SF3B1
20.3638	20.8793	20.9214	20.9393	20.2618	21.9321	21.502	23.2522	21.7883	20.4736	19.7104	20.6364	Spliceosome	19	19	19	13.4	13.4	13.4	244.5	46.923	O75643;B4E0P5	U5 small nuclear ribonucleoprotein 200 kDa helicase	SNRNP200
NaN	NaN	NaN	16.4184	18.4903	NaN	NaN	NaN	NaN	NaN	17.5856	NaN		1	1	1	3.4	3.4	3.4	54.812	2.8362	O75844	CAAX prenyl protease 1 homolog	ZMPSTE24
22.9596	23.2536	21.8893	22.5587	NaN	16.518	20.8725	23.196	23.5127	22.4215	19.6464	22.3514	Alzheimer's disease;Huntington's disease;Oxidative phosphorylation;Parkinson's disease	5	5	5	45.3	45.3	45.3	18.491	13.146	O75947;F5H608	ATP synthase subunit d, mitochondrial	ATP5H
20.8385	20.1378	23.0804	17.7609	NaN	NaN	21.1162	20.3481	NaN	NaN	NaN	NaN		4	4	4	20.6	20.6	20.6	37.432	8.562	O76003	Glutaredoxin-3	GLRX3
20.7854	19.588	21.04	18.6904	NaN	NaN	NaN	19.0459	19.9412	NaN	19.9003	NaN		1	1	1	1.1	1.1	1.1	112.61	3.042	O95197	Reticulon-3	RTN3
NaN	NaN	NaN	NaN	18.8934	NaN	NaN	20.5578	20.2357	NaN	NaN	NaN		2	2	2	4.3	4.3	4.3	83.353	4.161	O95202	LETM1 and EF-hand domain-containing protein 1, mitochondrial	LETM1
22.3883	21.57	22.7621	17.5165	19.1946	21.3082	21.3382	20.2207	17.9045	NaN	19.6897	19.3073		6	6	6	8	8	8	119.52	21.124	O95373;E9PLB2	Importin-7	IPO7
NaN	NaN	NaN	20.2591	NaN	NaN	NaN	21.2981	20.9043	NaN	20.0261	NaN	Adipocytokine signaling pathway;Fatty acid metabolism;Peroxisome;PPAR signaling pathway	2	2	2	4.9	4.9	4.9	80.419	3.7576	O95573;F5GWH2;O60488	Long-chain-fatty-acid--CoA ligase 3;Long-chain-fatty-acid--CoA ligase 4	ACSL3;ACSL4
NaN	NaN	NaN	19.8996	NaN	NaN	NaN	NaN	NaN	20.2046	18.0106	NaN	Apoptosis	4	4	4	7.7	7.7	7.7	66.9	6.6903	O95831;E9PMA0	Apoptosis-inducing factor 1, mitochondrial	AIFM1
NaN	NaN	NaN	17.9834	NaN	NaN	19.8377	21.0896	17.8647	18.1402	NaN	NaN		3	3	3	5.5	5.5	5.5	76.096	4.4979	O96005;K7EJ16;K7EQQ1	Cleft lip and palate transmembrane protein 1	CLPTM1
21.4892	NaN	NaN	20.7528	19.9191	NaN	21.184	21.6095	20.9618	21.0007	NaN	NaN	Amyotrophic lateral sclerosis (ALS)	6	6	6	33	33	33	37.893	32.487	O96008;K7EJ57;K7EKG4	Mitochondrial import receptor subunit TOM40 homolog	TOMM40
24.8244	24.7223	25.3265	24.362	24.8619	25.304	22.6494	22.5776	22.9402	23.665	22.6686	26.1272	Cysteine and methionine metabolism;Glycolysis / Gluconeogenesis;Propanoate metabolism;Pyruvate metabolism	19	18	18	56	52.4	52.4	36.688	108.18	P00338;F5GXY2;F5GYU2;F5GXH2;F5H5J4;F5H6W8;F5GZQ4;F5H8H6;F5GXC7;F5GWW2;F5GXU1	L-lactate dehydrogenase A chain	LDHA
NaN	NaN	NaN	NaN	NaN	NaN	19.3315	19.8986	NaN	21.8811	NaN	NaN	Alanine, aspartate and glutamate metabolism;Arginine and proline metabolism;D-Glutamine and D-glutamate metabolism;Nitrogen metabolism;Proximal tubule bicarbonate reclamation	4	4	4	12.5	12.5	12.5	61.397	9.1572	P00367;P49448	Glutamate dehydrogenase 1, mitochondrial;Glutamate dehydrogenase 2, mitochondrial	GLUD1;GLUD2
21.2255	20.395	21.5353	NaN	NaN	NaN	NaN	NaN	NaN	NaN	NaN	NaN	Glutathione metabolism	2	2	2	6.1	6.1	6.1	56.256	6.6392	P00390;H0YC68	Glutathione reductase, mitochondrial	GSR
NaN	NaN	NaN	21.9201	19.8577	22.1723	19.2913	NaN	NaN	21.8155	NaN	20.5315	Alzheimer's disease;Cardiac muscle contraction;Huntington's disease;Oxidative phosphorylation;Parkinson's disease	2	2	2	13.2	13.2	13.2	25.565	9.6748	P00403	Cytochrome c oxidase subunit 2	MT-CO2
24.305	24.5513	25.6686	NaN	24.3728	24.3141	23.1441	22.4927	22.9625	NaN	NaN	23.7046	Amyotrophic lateral sclerosis (ALS);Huntington's disease;Peroxisome;Prion diseases	3	3	3	53.9	53.9	53.9	15.936	25.239	P00441;H7BYH4	Superoxide dismutase [Cu-Zn]	SOD1
NaN	NaN	21.952	19.8873	20.0506	NaN	NaN	19.3628	19.6304	NaN	19.805	NaN	Drug metabolism - other enzymes;Purine metabolism	3	3	3	24.3	24.3	24.3	24.579	7.2389	P00492	Hypoxanthine-guanine phosphoribosyltransferase	HPRT1
NaN	NaN	NaN	NaN	23.0446	NaN	19.4625	18.4213	20.1033	20.6547	NaN	NaN	Alanine, aspartate and glutamate metabolism;Arginine and proline metabolism;Cysteine and methionine metabolism;Fat digestion and absorption;Phenylalanine metabolism;Phenylalanine, tyrosine and tryptophan biosynthesis;Tyrosine metabolism	6	6	6	18.1	18.1	18.1	47.517	27.878	P00505	Aspartate aminotransferase, mitochondrial	GOT2
27.3643	27.283	27.3997	26.3833	25.8049	26.3501	24.0092	24.6365	23.9673	24.9753	26.7316	26.7292	Carbon fixation in photosynthetic organisms;Glycolysis / Gluconeogenesis	26	26	26	74.6	74.6	74.6	44.614	198.17	P00558;P07205	Phosphoglycerate kinase 1	PGK1
24.6649	25.16	24.7777	26.2788	23.0091	21.144	22.7229	23.4252	23.888	25.4748	24.3121	23.1494	Arrhythmogenic right ventricular cardiomyopathy (ARVC);Dilated cardiomyopathy;Hypertrophic cardiomyopathy (HCM)	22	22	22	41.3	41.3	41.3	74.139	141.26	P02545;Q3BDU5;Q5TCI8;H0YAB0;A0A0C4DGC5	Prelamin-A/C;Lamin-A/C	LMNA
22.4426	20.9322	23.626	19.8634	NaN	NaN	20.457	21.4904	23.4703	20.9781	NaN	NaN	Endocytosis;Hematopoietic cell lineage;Phagosome	7	7	7	11.1	11.1	11.1	84.87	21.453	P02786;G3V0E5;F8WBE5	Transferrin receptor protein 1;Transferrin receptor protein 1, serum form	TFRC
26.0835	25.5312	26.0163	25.8724	23.7479	24.3035	21.9873	23.7957	23.6517	24.4023	23.6315	25.245	Carbon fixation in photosynthetic organisms;Fructose and mannose metabolism;Glycolysis / Gluconeogenesis;Pentose phosphate pathway	18	18	15	62.9	62.9	53.3	39.42	94.27	P04075;H3BQN4;J3KPS3;H3BPS8;H3BUH7;H3BR04;H3BR68;H3BMQ8;H3BU78;A0A087WXX2;P05062	Fructose-bisphosphate aldolase A;Fructose-bisphosphate aldolase	ALDOA
24.5287	24.0348	24.6085	23.8006	24.1476	24.2196	22.3689	22.889	22.5502	22.1781	23.7172	24.1268		12	12	12	43.1	43.1	43.1	38.714	56.94	P04083;Q5T3N1;Q5T3N0	Annexin A1;Annexin	ANXA1
NaN	NaN	NaN	20.098	NaN	NaN	20.041	NaN	NaN	19.5649	19.0473	NaN	Arginine and proline metabolism	3	3	3	10	10	10	48.534	5.2745	P04181	Ornithine aminotransferase, mitochondrial;Ornithine aminotransferase, hepatic form;Ornithine aminotransferase, renal form	OAT
22.2209	22.2554	22.5317	20.7406	19.1501	21.3656	NaN	19.4537	19.3326	18.8836	18.0478	21.3438	Gap junction;Pathogenic Escherichia coli infection;Phagosome	19	3	1	65.1	8.1	3.8	49.585	12.166	P04350;M0R278;M0R1I1	Tubulin beta-4A chain	TUBB4A
29.8096	29.9011	29.7428	28.56	28.7143	30.0125	26.893	27.7261	27.3379	27.1734	28.8155	29.3718	Alzheimer's disease;Glycolysis / Gluconeogenesis	28	28	28	84.8	84.8	84.8	36.053	196.42	P04406;E7EUT5;O14556	Glyceraldehyde-3-phosphate dehydrogenase	GAPDH
NaN	NaN	NaN	NaN	NaN	NaN	20.2192	22.3992	21.8313	21.7856	23.8938	23.2598	Amoebiasis;MAPK signaling pathway;VEGF signaling pathway	4	4	4	39.5	39.5	39.5	22.782	23.009	P04792;F8WE04;C9J3N8	Heat shock protein beta-1	HSPB1
NaN	NaN	18.4253	21.3893	19.0219	NaN	17.9635	18.4679	19.7238	22.1744	20.2834	NaN	N-Glycan biosynthesis;Protein processing in endoplasmic reticulum;Various types of N-glycan biosynthesis	6	6	6	12.2	12.2	12.2	68.569	17.705	P04843;B7Z4L4;F8WF32	Dolichyl-diphosphooligosaccharide--protein glycosyltransferase subunit 1	RPN1
NaN	NaN	NaN	19.4695	NaN	21.1311	20.6666	22.1853	21.6281	21.9289	20.8291	19.7326	N-Glycan biosynthesis;Protein processing in endoplasmic reticulum;Various types of N-glycan biosynthesis	7	7	7	19.5	19.5	19.5	69.283	34.821	P04844;Q5JYR7;Q5JYR4;Q5JYR3;H0Y5M1;F2Z3K5	Dolichyl-diphosphooligosaccharide--protein glycosyltransferase subunit 2	RPN2
20.0406	NaN	NaN	20.4823	17.9422	NaN	18.5417	NaN	NaN	21.0432	NaN	NaN	Amoebiasis;Axon guidance;Calcium signaling pathway;Chagas disease (American trypanosomiasis);Chemokine signaling pathway;Gap junction;Gastric acid secretion;Leukocyte transendothelial migration;Long-term depression;Melanogenesis;Olfactory transduction;Phototransduction;Progesterone-mediated oocyte maturation;Tight junction;Toxoplasmosis	4	4	3	14.9	14.9	11.8	40.45	8.5767	P04899;P63096;P08754;P09471;A0A087WTB6;A2A2R6;Q5JWD1;H0Y7E8;H3BTM2;A0A087WZE5;C9JPP4;Q5JWE9;H0Y7F4;P11488;P19087;A8MTJ3;P38405	Guanine nucleotide-binding protein G(i) subunit alpha-2;Guanine nucleotide-binding protein G(i) subunit alpha-1;Guanine nucleotide-binding protein G(k) subunit alpha;Guanine nucleotide-binding protein G(o) subunit alpha	GNAI2;GNAI1;GNAI3;GNAO1
NaN	21.3992	21.4698	22.3331	16.2453	19.2769	18.2672	22.2159	21.8622	22.7945	22.8543	21.8695	Aldosterone-regulated sodium reabsorption;Bile secretion;Carbohydrate digestion and absorption;Cardiac muscle contraction;Collecting duct acid secretion;Endocrine and other factor-regulated calcium reabsorption;Gastric acid secretion;Mineral absorption;Oxidative phosphorylation;Pancreatic secretion;Protein digestion and absorption;Proximal tubule bicarbonate reclamation;Salivary secretion	10	10	10	14.4	14.4	14.4	112.89	47.992	P05023;M0R116;A0A0A0MT26;P13637;H0Y7C1;B1AKY9;P50993;Q13733;P54707;Q5TC02;Q5TC01;P20648	Sodium/potassium-transporting ATPase subunit alpha-1;Sodium/potassium-transporting ATPase subunit alpha-3	ATP1A1;ATP1A3
22.1084	21.7467	23.3823	23.172	24.0149	22.0275	23.0804	23.375	24.0359	22.4428	22.3265	20.5202	Calcium signaling pathway;Huntington's disease;Parkinson's disease	7	7	3	25.8	25.8	15.4	32.852	24.429	P05141;Q9H0C2	ADP/ATP translocase 2;ADP/ATP translocase 2, N-terminally processed	SLC25A5
25.6741	25.2652	26.3033	22.4366	24.5777	24.9597	24.6627	25.1577	24.9523	21.1323	23.5156	24.5706	Ribosome	4	4	4	79.8	79.8	79.8	11.514	28.39	P05386	60S acidic ribosomal protein P1	RPLP1
24.0135	23.9925	20.7072	24.0842	20.9134	21.64	20.4359	22.2837	21.8411	23.6433	22.2238	23.0884	Ribosome	5	5	5	53.9	53.9	53.9	11.665	29.417	P05387;H0YDD8	60S acidic ribosomal protein P2	RPLP2
24.9425	25.0262	24.8238	23.3547	23.397	23.3079	23.3027	23.9122	23.6315	22.5288	23.4578	23.6205	Ribosome	10	10	10	46.1	46.1	46.1	34.273	52.278	P05388;F8VWS0;F8VU65;F8VPE8;G3V210;F8VW21;F8VQY6;F8VRK7;Q8NHW5;F8VZS0;F8VWV4;F8VS58;F8W1K8	60S acidic ribosomal protein P0;60S acidic ribosomal protein P0-like	RPLP0;RPLP0P6
21.5828	23.1615	22.2462	19.4234	21.192	22.1395	21.3706	21.6837	21.4515	19.681	21.526	NaN	Systemic lupus erythematosus	9	9	9	25.7	25.7	25.7	46.836	25.499	P05455;E7ERC4;E9PGX9;E9PFL9	Lupus La protein	SSB
23.4556	23.4224	23.7597	24.7554	23.8955	23.6343	23.0914	24.329	24.4794	23.928	22.854	22.5172	Arrhythmogenic right ventricular cardiomyopathy (ARVC);Axon guidance;Bacterial invasion of epithelial cells;Cell adhesion molecules (CAMs);Dilated cardiomyopathy;ECM-receptor interaction;Focal adhesion;Hypertrophic cardiomyopathy (HCM);Leishmaniasis;Leukocyte transendothelial migration;Pathogenic Escherichia coli infection;Pathways in cancer;Phagosome;Regulation of actin cytoskeleton;Shigellosis;…	14	14	14	28.9	28.9	28.9	88.414	53.21	P05556;E7EQW5;C9JPK5;Q5T3E6;E9PLR6;E7EUI6;H7C4N8;E7ERX5	Integrin beta-1	ITGB1
25.8998	26.235	26.4105	27.0451	24.8534	26.1479	25.7304	26.2294	26.5261	27.0414	25.9962	26.6337	Alzheimer's disease;Huntington's disease;Oxidative phosphorylation;Parkinson's disease	25	25	25	72.6	72.6	72.6	56.559	227.63	P06576;H0YH81;F8W079;F8W0P7;H0YI37	ATP synthase subunit beta, mitochondrial;ATP synthase subunit beta	ATP5B
28.5583	28.3682	28.5785	27.8066	26.4303	27.9254	25.8369	26.2882	25.8732	26.7604	27.6028	28.469	Glycolysis / Gluconeogenesis;Methane metabolism;RNA degradation	26	26	23	72.8	72.8	60.1	47.168	275.13	P06733;K7EM90;P13929;E5RI09;E5RG95;K7EPM1;K7EKN2;E5RGZ4;F5H0C8;F5H1C3	Alpha-enolase	ENO1
24.9315	25.5114	25.7528	23.5706	25.437	25.2481	23.3995	23.7412	23.2992	21.8091	24.2851	26.0973	Amino sugar and nucleotide sugar metabolism;Glycolysis / Gluconeogenesis;Pentose phosphate pathway;Starch and sucrose metabolism	15	15	11	42.8	42.8	33.3	63.146	86.584	P06744;A0A0A0MTS2;K7EQ48;A0A0J9YXP8;A0A0J9YYH3;A0A0J9YX90;K7ENA0;K7EPY4;K7EP41;K7ERC6;K7ELR7;K7ESF4;K7ERK8	Glucose-6-phosphate isomerase	GPI
27.8359	28.0831	28.2359	27.0819	24.6063	26.4928	27.233	27.7129	27.6596	26.5863	22.4951	27.4936		11	11	11	44.6	44.6	44.6	32.575	81.2	P06748;E5RI98;E5RGW4	Nucleophosmin	NPM1
NaN	NaN	NaN	18.8156	NaN	NaN	17.8827	NaN	NaN	20.6445	20.6046	NaN	Arrhythmogenic right ventricular cardiomyopathy (ARVC);Cell adhesion molecules (CAMs);Dilated cardiomyopathy;ECM-receptor interaction;Focal adhesion;Hypertrophic cardiomyopathy (HCM);Pathways in cancer;Phagosome;Regulation of actin cytoskeleton;Small cell lung cancer	4	4	4	5.3	5.3	5.3	116.04	8.0345	P06756	Integrin alpha-V;Integrin alpha-V heavy chain;Integrin alpha-V light chain	ITGAV
26.1241	26.1975	26.1938	25.1083	25.337	26.7632	22.9886	24.2068	23.6935	24.1972	25.087	27.0197	Cysteine and methionine metabolism;Glycolysis / Gluconeogenesis;Propanoate metabolism;Pyruvate metabolism	19	19	18	67.4	67.4	63.8	36.638	125.4	P07195;A8MW50;C9J7H8;F5H793;F5H5G7;F5H155;G3XAP5;F5H245;P07864	L-lactate dehydrogenase B chain;L-lactate dehydrogenase	LDHB
19.8746	21.1584	23.4838	25.5639	24.3931	NaN	22.2035	23.3094	24.0581	25.1743	23.3671	16.0601	Protein processing in endoplasmic reticulum	19	19	19	45.7	45.7	45.7	57.116	60.829	P07237;H7BZ94;I3L312;I3L398;I3L4M2;I3NI03;H0Y3Z3;I3L3P5;I3L3U6;I3L0S0;I3L1Y5;I3L514	Protein disulfide-isomerase	P4HB
NaN	NaN	19.7324	21.4178	20.0806	20.6826	20.0024	20.5898	NaN	21.5701	19.4902	NaN	ko05152;Lysosome	4	4	4	13.8	13.8	13.8	44.552	9.4593	P07339;H7C1V0;F8W787;H7C469;F8WD96;C9JH19	Cathepsin D;Cathepsin D light chain;Cathepsin D heavy chain	CTSD
26.8566	26.9713	26.7186	27.402	26.2099	25.346	24.0422	25.5374	25.3232	25.3123	24.5469	24.8813		22	22	22	59.6	59.6	59.6	38.604	143.31	P07355;H0YN42;A6NMY6;H0YMD0;H0YMU9;H0YKS4;H0YM50;H0YMM1;H0YNP5;H0YN28;H0YL33;H0YKZ7;H0YLV6;H0YMT9;H0YKX9;H0YKL9;H0YMW4;H0YN52;H0YNA0;H0YKV8;H0YMD9;H0YNB8;H0YKN4;H0YLE2	Annexin A2;Annexin;Putative annexin A2-like protein	ANXA2;ANXA2P2
NaN	NaN	NaN	NaN	20.9617	20.7284	NaN	NaN	NaN	NaN	NaN	NaN	Alzheimer's disease;Apoptosis;Protein processing in endoplasmic reticulum	3	3	3	9.5	9.5	9.5	81.889	7.5122	P07384;E9PJJ3;E9PLC9;E9PMC6;E9PJA6;E9PSA6;E9PQB3;E9PRM1	Calpain-1 catalytic subunit	CAPN1
27.1084	27.0553	27.0636	25.6223	24.7289	24.8594	24.7362	24.6408	24.8266	24.0391	24.88	26.433	Gap junction;Pathogenic Escherichia coli infection;Phagosome	21	7	6	69.5	22.8	19.2	47.766	108.54	Q5JP53;P07437;Q5ST81;A6NNZ2	Tubulin beta chain	TUBB
21.7164	21.2733	23.1486	18.3851	22.3339	23.6085	22.2172	23.0249	23.302	19.4701	23.8122	22.2172	Lysosome	4	4	4	10.1	10.1	10.1	58.112	15.581	P07602;C9JIZ6;Q5BJH1	Prosaposin;Saposin-A;Saposin-B-Val;Saposin-B;Saposin-C;Saposin-D	PSAP
NaN	NaN	NaN	NaN	NaN	NaN	19.535	NaN	20.4434	20.3204	NaN	NaN	Amino sugar and nucleotide sugar metabolism;Glycosaminoglycan degradation;Glycosphingolipid biosynthesis - ganglio series;Glycosphingolipid biosynthesis - globo series;Lysosome;Other glycan degradation	4	4	4	11.2	11.2	11.2	63.111	5.8678	P07686;Q5URX0;H0Y9B6;H0YA83	Beta-hexosaminidase subunit beta;Beta-hexosaminidase subunit beta chain B;Beta-hexosaminidase subunit beta chain A	HEXB
27.4883	26.9622	27.7452	25.047	26.5049	26.6942	26.3206	26.9336	26.2402	24.9691	26.4489	26.4035	Regulation of actin cytoskeleton;Shigellosis	12	12	12	91.4	91.4	91.4	15.054	103.17	P07737;K7EJ44;CON__P02584;I3L3D5	Profilin-1	PFN1
21.9553	21.715	22.5531	20.4661	19.3094	22.3764	NaN	20.3064	NaN	NaN	20.5635	21.1259	Purine metabolism	5	5	5	46.7	46.7	46.7	19.608	17.518	P07741;H3BQZ9;H3BQF1;H3BQB1;H3BSW3	Adenine phosphoribosyltransferase	APRT
20.4813	21.1648	21.2908	NaN	NaN	21.1368	19.7481	20.1015	20.4993	NaN	19.7969	18.744	Aminoacyl-tRNA biosynthesis;Porphyrin and chlorophyll metabolism	4	4	4	5.8	5.8	5.8	109.04	6.0106	V9GYZ6;P07814	Bifunctional glutamate/proline--tRNA ligase;Glutamate--tRNA ligase;Proline--tRNA ligase	EPRS
27.2995	27.1506	27.3064	26.4287	25.5113	26.0821	24.9719	25.8304	25.3981	26.0058	26.1054	26.9286	Antigen processing and presentation;NOD-like receptor signaling pathway;Pathways in cancer;Plant-pathogen interaction;Progesterone-mediated oocyte maturation;Prostate cancer;Protein processing in endoplasmic reticulum	42	27	27	52.6	37.6	37.6	84.659	194.4	P07900;G3V2J8;Q14568;Q58FG0;Q58FG1	Heat shock protein HSP 90-alpha	HSP90AA1
NaN	21.7708	21.5216	21.2581	NaN	NaN	NaN	NaN	NaN	21.2604	NaN	NaN	Alzheimer's disease;Cardiac muscle contraction;Huntington's disease;Oxidative phosphorylation;Parkinson's disease	1	1	1	19.8	19.8	19.8	10.739	5.5221	P07919	Cytochrome b-c1 complex subunit 6, mitochondrial	UQCRH
19.9843	NaN	NaN	18.9496	21.0711	NaN	NaN	NaN	20.749	19.9801	NaN	20.7072	Carbon fixation pathways in prokaryotes;Citrate cycle (TCA cycle);Pathways in cancer;Renal cell carcinoma	4	4	4	16.3	16.3	16.3	54.636	15.946	P07954	Fumarate hydratase, mitochondrial	FH
28.5052	28.2382	28.1045	28.0084	24.9437	27.0872	25.5108	26.7854	25.701	27.2627	26.7762	28.2277	Antigen processing and presentation;NOD-like receptor signaling pathway;Pathways in cancer;Plant-pathogen interaction;Progesterone-mediated oocyte maturation;Prostate cancer;Protein processing in endoplasmic reticulum	44	44	24	63.8	63.8	43.8	83.263	310.31	P08238;Q58FF7	Heat shock protein HSP 90-beta	HSP90AB1
NaN	NaN	21.0206	NaN	NaN	NaN	20.1982	20.3455	NaN	NaN	21.243	20.4822	Alanine, aspartate and glutamate metabolism;Nitrogen metabolism	3	3	3	7.8	7.8	7.8	64.369	7.2396	P08243;F8WEJ5;C9JLN6;C9JM09;C9JT45;C9J057	Asparagine synthetase [glutamine-hydrolyzing]	ASNS
NaN	NaN	NaN	19.6261	18.5371	NaN	NaN	17.477	22.7098	20.6292	21.4108	NaN	Alzheimer's disease;Cardiac muscle contraction;Huntington's disease;Oxidative phosphorylation;Parkinson's disease	4	4	4	20	20	20	35.422	9.4889	P08574	Cytochrome c1, heme protein, mitochondrial	CYC1
29.2853	29.473	29.913	29.5415	27.8416	28.172	29.0741	29.8056	30.0367	29.3792	27.4596	28.8336	Amyotrophic lateral sclerosis (ALS);Arrhythmogenic right ventricular cardiomyopathy (ARVC);Dilated cardiomyopathy;Hypertrophic cardiomyopathy (HCM)	49	49	46	79.6	79.6	74.2	53.651	323.31	P08670;B0YJC4;B0YJC5;Q5JVS8;P17661;H7C5W5;P41219;CON__Q9DCV7;CON__Q3KNV1;CON__P08729;P08729;U3KPR1;F8W0C6;B4DIR1;K7ELP4;F8W835;K7EJU1;K7EKH9;F8W1U3;CON__Q61726;A0A087X106;CON__O43790;CON__Q6NT21;CON__P78385;CON__Q9H552;CON__Q14533;CON__P78386;CON__Q8N1N4-2;CON__Q7RTT2;CON__P07744;CON__Q9NSB2;CON__Q6ISB0;CON__P12035;CON__Q01546;Q8IWY7;P14136;O43790;P78385;Q14533;P78386;Q8N1N4;Q9NSB2;P12035;Q01546	Vimentin	VIM
23.8807	23.6409	23.8561	21.7201	23.0274	23.4298	22.6725	23.5408	23.148	NaN	NaN	23.2763	Ribosome	4	4	4	48.9	48.9	48.9	15.55	24.143	P08708;H0YN88;A0A075B716;H0YN73	40S ribosomal protein S17	RPS17
23.5224	23.2025	23.8482	22.8094	22.468	19.9105	20.4402	21.479	20.8913	21.8593	23.346	22.4218		10	10	10	41.9	41.9	41.9	35.936	43.022	P08758;D6RBL5;D6RBE9;E9PHT9	Annexin A5;Annexin	ANXA5
23.8222	23.0986	24.4739	23.6575	24.4689	24.9203	NaN	NaN	NaN	NaN	20.3735	21.3538	Drug metabolism - cytochrome P450;Glutathione metabolism;Metabolism of xenobiotics by cytochrome P450	8	8	8	57.1	57.1	57.1	23.356	67.24	P09211;A8MX94;A0A087X2E9;A0A087X243	Glutathione S-transferase P	GSTP1
27.4221	27.5785	27.8145	25.4428	25.0984	22.5979	25.2198	25.0235	25.0274	24.6787	24.4265	23.6204		7	7	7	76.3	76.3	76.3	14.716	61.27	P09382;F8WEI7	Galectin-1	LGALS1
24.7044	24.7196	23.9016	23.2565	20.4783	21.3107	18.1933	19.3569	19.1027	21.5751	22.6464	22.6674	Base excision repair	6	6	6	30.4	30.4	30.4	18.311	17.107	Q5T7C4;P09429;B2RPK0	High mobility group protein B1	HMGB1
NaN	NaN	NaN	20.0842	20.2818	NaN	19.4683	19.8124	19.6902	20.0939	19.37	16.2368	Citrate cycle (TCA cycle);Glycine, serine and threonine metabolism;Glycolysis / Gluconeogenesis;Pyruvate metabolism;Valine, leucine and isoleucine degradation	6	6	6	14.5	14.5	14.5	54.177	25.767	P09622;E9PEX6;F8WDM5;F2Z2E3	Dihydrolipoyl dehydrogenase, mitochondrial;Dihydrolipoyl dehydrogenase	DLD
NaN	NaN	NaN	NaN	NaN	NaN	NaN	NaN	19.2208	NaN	20.3559	19.4894	Spliceosome	2	2	2	11	11	11	28.415	3.149	P09661;H0YLR3;H0YMA0;H0YKK0	U2 small nuclear ribonucleoprotein A	SNRPA1
24.9648	24.7131	25.6536	25.5465	24.9452	24.2262	16.8708	18.0897	17.7991	23.7015	25.0994	24.7693	Parkinson's disease	13	13	13	74.9	74.9	74.9	24.824	41.286	P09936;D6R956;D6RE83;D6R974;D6RF53	Ubiquitin carboxyl-terminal hydrolase isozyme L1;Ubiquitin carboxyl-terminal hydrolase	UCHL1
NaN	NaN	NaN	22.6984	19.3408	22.6746	NaN	21.63	21.2449	23.7209	NaN	24.2721	Systemic lupus erythematosus	5	3	3	53.9	46.9	46.9	13.509	13.422	Q71UI9;P0C0S5;C9J0D1;C9J386	Histone H2A.V;Histone H2A.Z;Histone H2A	H2AFV;H2AFZ
19.4218	NaN	NaN	20.3414	18.9816	19.6459	17.1948	20.2475	20.8208	21.6469	19.3794	18.9728	Alzheimer's disease;Cardiac muscle contraction;Huntington's disease;Oxidative phosphorylation;Parkinson's disease	4	4	4	18.6	18.6	18.6	29.668	14.721	P47985;P0C7P4	Cytochrome b-c1 complex subunit Rieske, mitochondrial;Cytochrome b-c1 complex subunit 11;Putative cytochrome b-c1 complex subunit Rieske-like protein 1	UQCRFS1;UQCRFS1P1
21.2243	22.4959	NaN	NaN	NaN	NaN	NaN	21.9817	21.4799	NaN	NaN	NaN	Shigellosis;Spliceosome	2	2	2	17.5	17.5	17.5	27.872	3.6259	P0DN76;Q01081	Splicing factor U2AF 35 kDa subunit	U2AF1
21.8265	NaN	22.4144	24.5296	NaN	NaN	19.0731	21.1555	19.7591	23.7358	NaN	NaN		5	5	5	16	16	16	21.364	18.935	P16403;P10412;P16402;P22492;Q02539	Histone H1.2;Histone H1.4;Histone H1.3	HIST1H1C;HIST1H1E;HIST1H1D
22.0119	23.0791	24.6779	NaN	23.7291	NaN	22.646	NaN	NaN	20.4419	22.0288	NaN		5	5	5	54.3	54.3	54.3	11.737	29.641	P10599	Thioredoxin	TXN
NaN	NaN	21.6432	21.2699	20.2119	NaN	21.2963	NaN	22.4925	NaN	NaN	NaN	Alzheimer's disease;Cardiac muscle contraction;Huntington's disease;Oxidative phosphorylation;Parkinson's disease	2	2	2	24.8	24.8	24.8	13.696	4.2556	P10606	Cytochrome c oxidase subunit 5B, mitochondrial	COX5B
27.4383	27.3629	27.6624	27.9901	26.7244	27.6267	26.7231	28.0844	27.9374	27.7808	25.9251	27.1639	ko05152;RNA degradation;Type I diabetes mellitus	39	39	39	76.3	76.3	76.3	61.054	323.31	P10809;E7EXB4;E7ESH4;C9JL25;C9JL19;C9JCQ4;C9J0S9	60 kDa heat shock protein, mitochondrial	HSPD1
23.6204	24.3606	25.098	27.0928	23.4002	23.6428	23.3312	24.2996	24.976	26.9301	23.0063	23.8746	Prion diseases;Protein export;Protein processing in endoplasmic reticulum	22	21	21	41.7	41.7	41.7	72.332	152.82	P11021	78 kDa glucose-regulated protein	HSPA5
27.7834	27.7682	27.6249	27.5901	25.2789	26.4202	25.6038	26.5189	25.8427	27.0761	26.5463	26.9733	Antigen processing and presentation;Endocytosis;MAPK signaling pathway;Measles;Protein processing in endoplasmic reticulum;Spliceosome;Toxoplasmosis	28	28	12	49.2	49.2	23.5	70.897	224.95	P11142;E9PKE3;E9PNE6;E9PN89;E9PLF4;E9PQQ4;E9PQK7;E9PK54;E9PPY6;E9PN25;E9PI65;P54652	Heat shock cognate 71 kDa protein	HSPA8
NaN	NaN	NaN	19.4275	NaN	NaN	NaN	NaN	NaN	21.602	19.5608	20.2713	Butanoate metabolism;Citrate cycle (TCA cycle);Glycolysis / Gluconeogenesis;Pyruvate metabolism;Valine, leucine and isoleucine biosynthesis	2	2	2	8.9	8.9	8.9	39.233	5.9466	P11177;F8WF02;C9J634	Pyruvate dehydrogenase E1 component subunit beta, mitochondrial	PDHB
19.4992	20.321	20.5654	NaN	NaN	NaN	NaN	NaN	19.4084	18.0579	21.211	19.7249	Insulin signaling pathway;Starch and sucrose metabolism	3	3	3	4.9	4.9	4.9	96.695	8.7493	P11216	Glycogen phosphorylase, brain form	PYGB
NaN	22.6362	20.7228	19.7691	NaN	20.0787	19.5613	NaN	21.8474	19.4152	21.4518	NaN	Base excision repair;Cell cycle;DNA replication;Mismatch repair;Nucleotide excision repair	4	4	4	20.7	20.7	20.7	28.768	29.367	P12004	Proliferating cell nuclear antigen	PCNA
22.0111	21.8673	21.2163	NaN	21.3507	NaN	22.3279	22.8135	22.6673	NaN	NaN	18.9941	Calcium signaling pathway;Huntington's disease;Parkinson's disease	6	2	2	26.8	13.4	13.4	32.866	7.1844	P12236;V9GYG0;P12235	ADP/ATP translocase 3;ADP/ATP translocase 3, N-terminally processed;ADP/ATP translocase 1	SLC25A6;SLC25A4
22.2914	23.586	22.3292	21.1316	21.1626	23.1869	NaN	18.0787	NaN	20.3848	NaN	23.1642	Drug metabolism - other enzymes;Purine metabolism	8	8	8	28.6	28.6	28.6	55.804	21.456	P12268;H0Y4R1;E7ETK5	Inosine-5-monophosphate dehydrogenase 2	IMPDH2
NaN	NaN	NaN	18.6806	NaN	19.8635	19.7841	20.1483	20.0596	20.1579	17.354	NaN	MAPK signaling pathway - yeast;Pathways in cancer;RNA transport;Thyroid cancer	4	4	4	2.1	2.1	2.1	267.29	34.977	P12270	Nucleoprotein TPR	TPR
23.3789	22.4766	22.9592	22.8727	22.8721	24.3531	21.4782	22.2514	NaN	20.4512	21.6317	22.8846	Arginine and proline metabolism	8	8	8	34.9	34.9	34.9	42.644	47.532	P12277;G3V4N7;H0YJG0;G3V461	Creatine kinase B-type	CKB
21.2207	20.4981	21.7941	21.283	21.7259	NaN	NaN	16.3935	19.733	NaN	22.5814	NaN	Adherens junction;Amoebiasis;Arrhythmogenic right ventricular cardiomyopathy (ARVC);Focal adhesion;Leukocyte transendothelial migration;Regulation of actin cytoskeleton;Systemic lupus erythematosus;Tight junction	18	6	0	23.2	8.3	0	103.06	25.397	P12814;G3V2N5	Alpha-actinin-1	ACTN1
20.9032	20.2294	22.0216	NaN	21.1109	NaN	21.569	21.2634	20.6509	NaN	18.5552	NaN		2	2	2	7.9	7.9	7.9	54.548	6.1648	P12955;V9GYL0	Xaa-Pro dipeptidase	PEPD
25.1566	25.2331	25.5504	23.1569	23.0009	25.0355	24.2213	25.5323	25.5495	22.7821	23.3988	25.687	Non-homologous end-joining	23	23	23	47.1	47.1	47.1	82.704	60.055	P13010;C9JZ81;H7C0H9	X-ray repair cross-complementing protein 5	XRCC5
NaN	NaN	21.3707	21.4302	NaN	NaN	NaN	20.3557	20.2073	20.909	NaN	NaN	Alzheimer's disease;Cardiac muscle contraction;Huntington's disease;Oxidative phosphorylation;Parkinson's disease	3	3	3	13.6	13.6	13.6	19.576	2.1232	P13073;H3BNI5;Q86WV2;H3BN72;H3BNV9	Cytochrome c oxidase subunit 4 isoform 1, mitochondrial	COX4I1
21.0385	19.8686	NaN	19.794	NaN	NaN	NaN	NaN	NaN	NaN	20.1453	NaN		5	5	5	17.4	17.4	17.4	49.973	12.143	P13489;H0YCR7;E9PMA9;E9PMN0;E9PIK5;E9PMJ3;E9PLZ3;E9PIM9	Ribonuclease inhibitor	RNH1
27.7946	27.68	28.0868	26.1424	26.0604	27.2605	26.2367	26.968	26.1722	25.7935	25.7531	27.2232		37	37	36	60.8	60.8	59.7	95.337	294.45	P13639;K7EJ74	Elongation factor 2	EEF2
18.1777	22.6408	21.1056	23.9069	22.7045	19.0723	19.1533	23.1655	22.6781	24.2212	22.4104	20.4702	Protein processing in endoplasmic reticulum;Vibrio cholerae infection	14	14	14	27.6	27.6	27.6	72.932	51.281	P13667	Protein disulfide-isomerase A4	PDIA4
20.0044	18.5524	NaN	18.6502	19.21	NaN	NaN	20.3629	20.6656	21.0328	20.0403	NaN		5	5	5	24.6	24.6	24.6	35.079	11.191	P13804;H0YK49;H0YL12;H0YNX6;H0YLU7;H0YKF0;H0YL83	Electron transfer flavoprotein subunit alpha, mitochondrial	ETFA
NaN	NaN	21.6456	23.162	23.9278	20.1941	20.6931	20.2725	20.4522	22.9498	22.9577	20.2768	Phenylalanine metabolism;Tyrosine metabolism	2	2	2	17.4	17.4	17.4	12.476	9.3723	P14174	Macrophage migration inhibitory factor	MIF
28.2493	28.1784	28.2607	27.7999	26.8498	27.0144	24.6194	25.8469	25.3649	25.6516	26.4363	27.2944	Carbon fixation in photosynthetic organisms;Glycolysis / Gluconeogenesis;Insulin signaling pathway;Maturity onset diabetes of the young;Purine metabolism;Pyruvate metabolism;Type II diabetes mellitus	38	38	38	74.2	74.2	74.2	57.936	245.64	P14618;B4DNK4;H3BTN5;H3BR70;H3BQ34;H3BUW1;H3BTJ2;H3BT25;H3BU13;H3BN34;H3BQZ3;P30613	Pyruvate kinase PKM;Pyruvate kinase	PKM
22.667	NaN	23.484	25.9165	24.3986	24.2434	22.7467	23.0219	24.3549	24.9641	23.29	23.0036	NOD-like receptor signaling pathway;Pathways in cancer;Plant-pathogen interaction;Prostate cancer;Protein processing in endoplasmic reticulum	29	27	27	37.6	35.9	35.9	92.468	84.87	P14625;Q96GW1;H0YIV0;F8W026;Q58FF3	Endoplasmin	HSP90B1
22.5922	22.3757	23.5242	22.3815	22.2606	20.6425	22.197	23.7393	24.0098	22.7815	NaN	22.0254	Alzheimer's disease;Cardiac muscle contraction;Huntington's disease;Oxidative phosphorylation;Parkinson's disease	4	4	4	58.1	58.1	58.1	10.192	23.454	P14854	Cytochrome c oxidase subunit 6B1	COX6B1
18.6638	18.7073	19.8376	NaN	20.6137	NaN	NaN	19.5924	NaN	NaN	NaN	20.9878	Aminoacyl-tRNA biosynthesis	5	5	5	11.2	11.2	11.2	57.136	7.6181	P14868;C9JQM9;C9J7S3;C9JLC1;H7BZ35;H7C278	Aspartate--tRNA ligase, cytoplasmic	DARS
21.5039	22.5212	22.4631	NaN	20.2701	NaN	21.9396	22.3958	NaN	NaN	NaN	20.47	Purine metabolism;Pyrimidine metabolism	9	1	1	72.4	15.8	15.8	17.149	1.9199	P15531;E5RHP0;C9K028	Nucleoside diphosphate kinase A	NME1
23.0224	23.7977	NaN	22.9488	20.2279	22.1285	NaN	21.5629	21.068	20.7843	22.2668	23.4809	Ribosome	10	10	10	39.6	39.6	39.6	31.324	49.621	P15880;H0YEN5;E9PQD7;I3L404;E9PMM9;E9PPT0;E9PM36;H3BNG3;H0YE27	40S ribosomal protein S2	RPS2
NaN	NaN	NaN	NaN	NaN	NaN	NaN	NaN	NaN	18.3203	21.115	NaN	Arachidonic acid metabolism	3	3	3	16.6	16.6	16.6	30.375	3.7672	P16152;E9PQ63;A8MTM1	Carbonyl reductase [NADPH] 1	CBR1
20.2973	20.9113	NaN	NaN	19.5135	NaN	NaN	19.6162	NaN	NaN	20.0942	NaN	Antigen processing and presentation;Endocytosis;MAPK signaling pathway;Measles;Protein processing in endoplasmic reticulum;Spliceosome;Toxoplasmosis	6	1	1	10.1	1.7	1.7	71.027	2.8678	P17066;P48741	Heat shock 70 kDa protein 6;Putative heat shock 70 kDa protein 7	HSPA6;HSPA7
22.2774	21.7424	24.6917	22.3253	NaN	20.1581	NaN	19.1419	20.7752	22.243	20.8251	22.7624		2	2	2	23.4	23.4	23.4	11.676	8.7783	P17096	High mobility group protein HMG-I/HMG-Y	HMGA1
NaN	NaN	NaN	19.0461	18.175	20.5317	NaN	NaN	NaN	NaN	17.7277	NaN	Alanine, aspartate and glutamate metabolism;Arginine and proline metabolism;Cysteine and methionine metabolism;Phenylalanine metabolism;Phenylalanine, tyrosine and tryptophan biosynthesis;Tyrosine metabolism	4	4	4	16	16	16	46.247	5.6028	P17174	Aspartate aminotransferase, cytoplasmic	GOT1
19.8233	21.7954	20.9786	NaN	21.1378	20.6361	NaN	NaN	NaN	NaN	NaN	NaN	Alzheimer's disease;Apoptosis;Focal adhesion;Protein processing in endoplasmic reticulum	5	5	5	12.4	12.4	12.4	79.994	25.083	P17655	Calpain-2 catalytic subunit	CAPN2
20.7642	21.464	21.3693	16.7829	18.6794	NaN	18.6136	19.5455	NaN	NaN	NaN	NaN	Pyrimidine metabolism	2	2	2	4.4	4.4	4.4	66.69	7.8586	P17812	CTP synthase 1	CTPS1
25.2454	25.4365	24.8917	23.4282	22.8855	23.695	23.2264	24.1061	23.6086	22.3343	22.8106	24.7175		19	19	19	51.1	51.1	51.1	60.343	95.687	P17987;E7ERF2;E7EQR6;F5H282;F5H136;F5H676;F5H726;F5GZ03;F5GZI8;F5GYL4;F5H7Y1	T-complex protein 1 subunit alpha	TCP1
NaN	NaN	NaN	19.8542	18.6869	NaN	NaN	NaN	NaN	NaN	NaN	NaN		4	1	1	32.8	3.9	3.9	20.511	1.424	P18085;F5H0C7;C9JPM4;C9JAK5;F5H1V1;F5H6T5;F8WDB3;U3KQF2	ADP-ribosylation factor 4	ARF4;ARF3
21.6831	21.8261	21.4208	18.2233	21.9569	22.538	21.3806	21.198	20.4346	17.3637	21.4438	23.0748	Adherens junction;Amoebiasis;Bacterial invasion of epithelial cells;Focal adhesion;Leukocyte transendothelial migration;Regulation of actin cytoskeleton;Shigellosis	6	6	6	10.4	10.4	10.4	123.8	19.31	P18206;A0A096LPE1;Q5JQ13	Vinculin	VCL
25.16	25.0209	25.131	23.8504	23.3911	24.6279	22.3282	23.2112	22.8672	22.6615	23.6465	25.5997	Glycolysis / Gluconeogenesis;Methane metabolism	12	12	12	68.9	68.9	68.9	28.804	51.279	P18669;Q8N0Y7;P15259	Phosphoglycerate mutase 1	PGAM1
NaN	NaN	NaN	19.6921	NaN	NaN	NaN	20.6537	21.0062	19.9989	NaN	NaN	Alzheimer's disease;Huntington's disease;Oxidative phosphorylation;Parkinson's disease	2	2	2	26.9	26.9	26.9	12.587	3.4581	P18859;A8MUH2	ATP synthase-coupling factor 6, mitochondrial	ATP5J
25.7793	25.7063	25.8776	25.4169	24.1736	24.4449	24.3332	25.4039	25.0203	24.8181	23.0696	24.7387	Pathogenic Escherichia coli infection	21	21	21	30.3	30.3	30.3	76.613	120.19	P19338;H7BY16	Nucleolin	NCL
23.9875	24.2461	24.6122	NaN	22.7404	23.4838	23.9873	23.5151	22.9934	NaN	NaN	22.5136		3	3	3	33.5	33.5	33.5	22.168	19.459	P20290;H0Y9Y1;D6RDG3	Transcription factor BTF3	BTF3
18.4761	NaN	18.7835	NaN	21.6554	22.3178	NaN	NaN	NaN	NaN	21.3862	21.9998	Proteasome	3	3	3	19.9	19.9	19.9	26.489	15.854	P20618	Proteasome subunit beta type-1	PSMB1
17.6033	17.8011	21.8121	21.9213	NaN	NaN	16.9448	18.4634	22.1029	21.7024	NaN	20.1481	Alzheimer's disease;Cardiac muscle contraction;Huntington's disease;Oxidative phosphorylation;Parkinson's disease	6	6	6	52	52	52	16.762	15.935	P20674;H3BNX8;H3BRM5;H3BV69;H3BRI0	Cytochrome c oxidase subunit 5A, mitochondrial	COX5A
21.7196	23.1317	22.1837	23.8706	24.0891	22.4242	NaN	20.4585	NaN	NaN	19.4354	NaN	Focal adhesion;MAPK signaling pathway	25	22	21	16.7	15.1	14.5	276.55	61.585	Q5HY54;Q60FE5;P21333;A0A087WWY3;F8WE98;H7C2E7;H0Y5F3;H0Y5C6	Filamin-A	FLNA
NaN	NaN	NaN	22.3025	22.2329	22.4115	NaN	NaN	NaN	20.9211	NaN	22.2297	Nicotinate and nicotinamide metabolism;Purine metabolism;Pyrimidine metabolism	8	8	8	23.9	23.9	23.9	63.367	40.997	P21589;Q96B60;H0Y7R7;H0Y3X5	5-nucleotidase	NT5E
25.0706	24.855	25.1457	24.5723	23.8078	24.3543	24.9368	23.5705	25.2055	24.5228	24.5678	21.8368	Calcium signaling pathway;Huntington's disease;Parkinson's disease	12	12	12	63.6	63.6	63.6	30.772	73.593	P21796;C9JI87	Voltage-dependent anion-selective channel protein 1	VDAC1
NaN	NaN	NaN	20.7166	23.7923	NaN	NaN	NaN	NaN	NaN	NaN	NaN	Huntington's disease	7	7	7	16.6	16.6	16.6	77.328	28.174	P21980;A2A299	Protein-glutamine gamma-glutamyltransferase 2	TGM2
21.2544	21.6674	18.5392	NaN	22.2858	18.6453	21.7837	23.9704	23.2035	NaN	19.8241	19.0829	Ribosome biogenesis in eukaryotes	3	3	3	12.8	12.8	12.8	33.784	10.4	P22087;M0R2U2;M0R1H0;M0R2B0;M0R0P1;M0R299;M0QXL5;M0R2Q4	rRNA 2-O-methyltransferase fibrillarin	FBL
20.7053	NaN	21.1035	17.9753	19.053	21.1979	18.9129	NaN	19.4322	17.4946	22.5038	22.1007	One carbon pool by folate;Purine metabolism	7	7	7	10.7	10.7	10.7	107.77	16.62	P22102;F8WD69;C9JZG2;C9JKQ7;C9JBJ1;C9JTV6	Trifunctional purine biosynthetic protein adenosine-3;Phosphoribosylamine--glycine ligase;Phosphoribosylformylglycinamidine cyclo-ligase;Phosphoribosylglycinamide formyltransferase	GART
19.3751	18.9712	18.9022	18.4818	20.0143	NaN	18.8597	19.2411	17.5748	17.5552	19.8938	NaN	Peroxisome;PPAR signaling pathway;Primary bile acid biosynthesis	4	4	4	9.1	9.1	9.1	58.993	13.166	P22307;H0YF61	Non-specific lipid-transfer protein	SCP2
25.1002	25.1679	24.4186	23.2129	24.1335	22.9927	20.1159	22.1764	20.557	21.4433	23.7111	23.4992	Parkinson's disease;Ubiquitin mediated proteolysis	15	15	15	22.3	22.3	22.3	117.85	65.919	P22314;Q5JRR6;Q5JRS1;Q5JRS3;Q5JRS2;Q5JRR9;Q5JRS0	Ubiquitin-like modifier-activating enzyme 1	UBA1
26.1312	25.6576	25.885	25.6076	23.3803	22.9151	24.7823	25.6455	25.2666	25.4214	23.701	23.4616		18	18	18	58.1	58.1	58.1	37.429	99.013	P22626;A0A087WUI2	Heterogeneous nuclear ribonucleoproteins A2/B1	HNRNPA2B1
NaN	20.6653	NaN	19.5956	20.7428	24.3992	22.8833	23.5505	23.4175	22.2218	NaN	22.8846	Alzheimer's disease;Cardiac muscle contraction;Huntington's disease;Oxidative phosphorylation;Parkinson's disease	11	11	11	41.9	41.9	41.9	48.442	31.371	P22695;H3BSJ9;H3BRG4;H3BP04;H3BUE4;H3BUI9;A0A087WVZ4	Cytochrome b-c1 complex subunit 2, mitochondrial	UQCRC2
23.9917	24.1205	23.0184	24.0603	19.4826	21.9565	21.5328	23.9261	23.4406	22.8691	21.0653	22.8807		10	10	10	18.4	18.4	18.4	76.149	46.447	P23246;H0Y9K7	Splicing factor, proline- and glutamine-rich	SFPQ
21.8403	22.3943	21.2886	24.9289	22.2796	NaN	21.6307	21.6734	22.1066	25.1173	22.1277	21.4618		11	11	11	50.9	50.9	50.9	23.742	45.31	P23284	Peptidyl-prolyl cis-trans isomerase B	PPIB
21.5108	20.5726	NaN	19.3547	21.1368	21.5937	NaN	NaN	NaN	NaN	20.3675	21.2439	Aminoacyl-tRNA biosynthesis;Tryptophan metabolism	3	3	3	12.7	12.7	12.7	53.165	10.858	P23381;G3V5H5;P78534;G3V4A3;G3V4Q0;G3V2F2;G3V3R3;G3V4S4;G3V313;G3V339;G3V2C0;G3V4C7;G3V4N8;G3V4N0;G3V5W1;G3V3S7;G3V3X0;G3V3P2;G3V227;G3V2Y7;H0YJP3;G3V277	Tryptophan--tRNA ligase, cytoplasmic;T1-TrpRS;T2-TrpRS	WARS
24.7326	24.7108	23.13	22.9808	22.0458	23.6288	21.5709	23.361	22.7051	22.5249	21.2293	24.4795	Ribosome	8	8	8	41.6	41.6	41.6	26.688	24.849	P23396;E9PL09;E9PPU1;H0YEU2;F2Z2S8;H0YF32;H0YCJ7;E9PSF4;E9PQ96;E9PJH4;E9PK82;H0YES8;E9PQX2	40S ribosomal protein S3	RPS3
22.9909	22.6714	23.8291	22.2224	21.1491	20.0037	19.6923	20.8164	20.2084	20.4781	22.0305	20.5809	Cysteine and methionine metabolism	9	9	9	25.9	25.9	25.9	47.716	33.775	P23526	Adenosylhomocysteinase	AHCY
26.2534	26.4493	26.4394	26.0923	25.477	25.5957	24.5413	24.8959	24.3928	25.0583	24.9151	26.22	Axon guidance;Fc gamma R-mediated phagocytosis;Regulation of actin cytoskeleton	12	12	8	72.9	72.9	54.2	18.502	88.613	P23528;G3V1A4;E9PP50;E9PK25;E9PQB7;E9PS23;E9PLJ3	Cofilin-1	CFL1
24.8542	23.8771	25.0484	21.9771	20.2096	NaN	21.602	23.212	21.9288	21.2354	20.6404	22.8678		4	4	4	43.6	43.6	43.6	24.763	24.595	P24534;F2Z2G2;C9JZW3;F8WF65	Elongation factor 1-beta	EEF1B2
20.8669	20.3582	21.9733	NaN	21.3618	20.7478	21.3382	NaN	21.789	20.3893	19.5436	20.062	Alzheimer's disease;Huntington's disease;Oxidative phosphorylation;Parkinson's disease	2	2	2	9	9	9	28.908	4.5561	P24539;Q5QNZ2	ATP synthase F(0) complex subunit B1, mitochondrial	ATP5F1
NaN	NaN	20.3429	NaN	19.8601	NaN	22.2689	22.2839	22.3107	18.443	19.283	19.7148	Benzoate degradation;Butanoate metabolism;Carbon fixation pathways in prokaryotes;Fatty acid metabolism;Glyoxylate and dicarboxylate metabolism;Lysine degradation;Propanoate metabolism;Pyruvate metabolism;Synthesis and degradation of ketone bodies;Terpenoid backbone biosynthesis;Tryptophan metabolism;Two-component system;Valine, leucine and isoleucine degradation	6	6	6	23.7	23.7	23.7	45.199	34.688	P24752;H0YEL7;E9PRQ6;E9PKF3	Acetyl-CoA acetyltransferase, mitochondrial	ACAT1
24.4478	24.4105	23.7573	23.6074	21.4201	17.1072	20.3665	21.729	21.1541	22.8887	21.614	22.303	Ribosome	5	5	5	43.2	43.2	43.2	14.515	32.272	P25398	40S ribosomal protein S12	RPS12
25.8109	25.8294	25.3837	26.2383	24.6244	25.1953	25.08	25.969	25.7309	26.1252	24.9487	24.9271	Alzheimer's disease;Huntington's disease;Oxidative phosphorylation;Parkinson's disease	24	24	24	53	53	53	59.75	154.88	P25705;K7ERX7;K7EK77;K7EJP1;K7EQH4;K7ENJ4;K7ESA0	ATP synthase subunit alpha, mitochondrial	ATP5A1
NaN	NaN	NaN	19.7296	NaN	20.1761	NaN	NaN	NaN	NaN	NaN	20.2983	Proteasome	2	2	2	11	11	11	28.433	5.5011	P25788;G3V4X5	Proteasome subunit alpha type-3	PSMA3
21.8783	22.1357	18.1708	22.1445	20.441	14.9419	NaN	NaN	NaN	20.0685	20.7362	NaN	Leukocyte transendothelial migration;Measles;Regulation of actin cytoskeleton	13	6	6	22.2	14.6	14.6	67.819	18.722	P26038;V9GZ54	Moesin	MSN
22.8794	23.7664	18.4168	22.8717	17.6682	21.4085	19.7032	22.8271	22.7846	NaN	21.857	23.5216	Ribosome	6	6	6	29.4	29.4	29.4	24.261	14.639	P26373;J3QSB4;H3BTH3	60S ribosomal protein L13	RPL13
20.8576	21.8865	19.8946	NaN	18.5864	21.2964	NaN	NaN	NaN	NaN	NaN	20.9492	Aminoacyl-tRNA biosynthesis;Valine, leucine and isoleucine biosynthesis	3	3	3	5.4	5.4	5.4	140.47	12.526	P26640;A2ABF4;A0A0G2JJT9;H0Y426	Valine--tRNA ligase	VARS
24.3461	24.1672	25.2341	24.2734	24.3404	24.2394	23.3312	22.6034	23.4707	22.9039	23.1341	23.2673		15	15	15	49.9	49.9	49.9	50.118	75.718	P26641	Elongation factor 1-gamma	EEF1G
NaN	NaN	NaN	NaN	NaN	NaN	20.7794	NaN	20.5882	NaN	NaN	NaN		1	1	1	10.6	10.6	10.6	15.649	5.0049	P26885	Peptidyl-prolyl cis-trans isomerase FKBP2	FKBP2
NaN	NaN	NaN	NaN	NaN	NaN	19.6332	19.5474	21.4384	NaN	NaN	18.6671		3	3	3	15.3	15.3	15.3	31.73	6.9497	P27105;F8VSL7	Erythrocyte band 7 integral membrane protein	STOM
23.9232	23.8837	23.702	17.7305	20.0925	23.0948	NaN	21.2758	20.4019	18.9463	22.5814	23.8786	Cell cycle;Neurotrophin signaling pathway;Oocyte meiosis	6	4	4	24.9	21.6	21.6	27.764	69.33	P27348;E9PG15	14-3-3 protein theta	YWHAQ
20.7289	20.5213	NaN	20.2475	NaN	NaN	NaN	NaN	NaN	NaN	NaN	23.0746	Ribosome	3	3	2	20.4	20.4	14.4	23.072	11.598	X1WI28;P27635;B8A6G2;A6QRI9;H7C123;H7C2C5;A0A087WV22;Q96L21	60S ribosomal protein L10	RPL10
21.5744	23.5013	24.3478	23.8915	24.2883	22.1986	22.5728	24.8098	25.1723	23.6272	21.9615	23.6092	Antigen processing and presentation;Chagas disease (American trypanosomiasis);Phagosome;Protein processing in endoplasmic reticulum	10	10	10	45.6	45.6	45.6	48.141	39.109	P27797;K7EJB9;K7EL50	Calreticulin	CALR
24.3284	24.4894	24.3458	24.615	23.6936	23.8389	22.651	24.209	23.4997	24.2458	22.6679	22.796	Antigen processing and presentation;Phagosome;Protein processing in endoplasmic reticulum	13	13	13	27.5	27.5	27.5	67.567	40.125	P27824;H0Y9Q7;D6RB85;D6RDP7;D6RGY2;D6RFL1;D6RAU8;D6RAQ8;H0Y9H1;D6RHJ3;D6RD16	Calnexin	CANX
22.0079	NaN	NaN	22.3148	NaN	20.3975	NaN	NaN	NaN	21.4983	NaN	21.2156	Proteasome	2	2	2	12.9	12.9	12.9	26.411	4.4891	P28066	Proteasome subunit alpha type-5	PSMA5
NaN	NaN	NaN	18.1797	19.0249	NaN	NaN	NaN	NaN	NaN	20.6124	21.171	Proteasome	3	3	3	19.7	19.7	19.7	29.204	5.5244	P28070	Proteasome subunit beta type-4	PSMB4
NaN	NaN	NaN	20.6835	NaN	NaN	NaN	NaN	NaN	19.9516	NaN	20.8539	Proteasome	2	2	2	20.5	20.5	20.5	25.357	2.453	P28072;A0A087X2I4	Proteasome subunit beta type-6;Proteasome subunit beta type	PSMB6
NaN	NaN	NaN	18.54	21.9775	21.4624	20.3365	22.9536	22.1172	20.8829	NaN	21.2587	Arginine and proline metabolism;Glutathione metabolism	8	8	8	21.8	21.8	21.8	56.166	32.257	P28838;H0Y9Q1	Cytosol aminopeptidase	LAP3
24.3443	24.4355	25.1674	23.6134	23.5973	24.8241	23.0102	19.9893	22.8286	NaN	23.8981	24.086	Methane metabolism;Phenylalanine metabolism;Phenylpropanoid biosynthesis	9	9	9	56.7	56.7	56.7	25.035	43.442	P30041	Peroxiredoxin-6	PRDX6
21.9072	21.9934	23.3166	21.9061	21.9206	21.0907	18.5411	21.4023	21.5747	22.0393	22.5812	22.089	Peroxisome	8	8	8	50	50	50	22.086	19.247	P30044	Peroxiredoxin-5, mitochondrial	PRDX5
NaN	NaN	NaN	22.024	NaN	NaN	NaN	22.6734	22.8397	22.4057	22.9515	NaN		6	6	6	44.5	44.5	44.5	27.692	19.902	P30048	Thioredoxin-dependent peroxide reductase, mitochondrial	PRDX3
24.7247	24.6741	24.2981	23.9087	21.6841	22.7989	22.3443	23.8648	23.5586	23.4502	23.5134	23.9737	Ribosome	5	5	5	43	43	43	17.818	50.284	P30050	60S ribosomal protein L12	RPL12
NaN	20.0896	21.0898	22.0195	20.4088	NaN	21.3125	22.5537	21.4507	22.0578	22.0471	20.396	Aminobenzoate degradation;Benzoate degradation;beta-Alanine metabolism;Butanoate metabolism;Caprolactam degradation;Fatty acid elongation in mitochondria;Fatty acid metabolism;Lysine degradation;Propanoate metabolism;Tryptophan metabolism;Valine, leucine and isoleucine degradation	5	5	5	26.9	26.9	26.9	31.387	45.487	P30084	Enoyl-CoA hydratase, mitochondrial	ECHS1
19.3104	NaN	NaN	17.8418	NaN	NaN	NaN	NaN	NaN	16.2312	NaN	20.3494	Pyrimidine metabolism	1	1	1	8.7	8.7	8.7	22.222	4.5579	P30085	UMP-CMP kinase	CMPK1
23.9711	23.7827	24.7024	26.0366	24.2492	23.926	22.7935	23.9233	24.17	25.1242	22.2154	22.1304	Antigen processing and presentation;Protein processing in endoplasmic reticulum	22	22	22	48.1	48.1	48.1	56.782	94.022	P30101;H7BZJ3	Protein disulfide-isomerase A3	PDIA3
22.7651	23.7581	22.5879	21.2273	20.483	NaN	NaN	22.73	21.9191	20.3656	21.9879	22.1233	Cell cycle - yeast;Chagas disease (American trypanosomiasis);Hepatitis C;Long-term depression;Meiosis - yeast;mRNA surveillance pathway;Oocyte meiosis;TGF-beta signaling pathway;Tight junction;Wnt signaling pathway	7	7	7	19.4	19.4	19.4	65.308	15.584	P30153;B3KQV6;H0YDG7;P30154;E9PH38;C9J9C1	Serine/threonine-protein phosphatase 2A 65 kDa regulatory subunit A alpha isoform	PPP2R1A
21.5786	21.8464	NaN	NaN	19.5858	NaN	NaN	NaN	NaN	NaN	NaN	NaN	Cysteine and methionine metabolism	2	2	2	7.1	7.1	7.1	43.66	9.7297	P31153	S-adenosylmethionine synthase isoform type-2	MAT2A
20.3953	22.2545	21.2655	NaN	21.0579	21.4148	17.0674	20.1014	NaN	NaN	20.1561	NaN	Protein processing in endoplasmic reticulum	4	4	4	17.6	17.6	17.6	44.868	14.698	P31689	DnaJ homolog subfamily A member 1	DNAJA1
NaN	NaN	NaN	16.7985	19.9165	NaN	19.7205	21.1279	16.7377	21.9606	NaN	NaN	Alzheimer's disease;Cardiac muscle contraction;Huntington's disease;Oxidative phosphorylation;Parkinson's disease	5	5	5	13.1	13.1	13.1	52.645	13.262	P31930	Cytochrome b-c1 complex subunit 1, mitochondrial	UQCRC1
22.3842	21.1241	NaN	21.6654	20.1859	23.6452	19.0437	NaN	NaN	18.8803	20.3705	23.2798	One carbon pool by folate;Purine metabolism	11	11	11	32.3	32.3	32.3	64.615	23.699	P31939;H7C1S2;C9JLK0;F8WEF0	Bifunctional purine biosynthesis protein PURH;Phosphoribosylaminoimidazolecarboxamide formyltransferase;IMP cyclohydrolase	ATIC
22.8961	22.5138	23.213	22.0939	21.1183	NaN	21.1248	22.5096	22.6711	20.3026	21.7408	21.2685		3	3	3	11.3	11.3	11.3	36.926	19.32	P31942	Heterogeneous nuclear ribonucleoprotein H3	HNRNPH3
24.7996	24.6459	24.1652	22.6928	20.9498	24.2375	NaN	22.7509	21.9961	21.3259	23.6191	24.5395	Cell cycle;Neurotrophin signaling pathway;Oocyte meiosis	9	7	7	36.2	32.9	32.9	28.082	111.15	P31946	14-3-3 protein beta/alpha;14-3-3 protein beta/alpha, N-terminally processed	YWHAB
24.486	23.8057	24.4639	22.4571	21.8311	23.7649	21.542	22.6905	21.9839	20.7421	21.9111	20.6341	Prion diseases	11	11	11	22.8	22.8	22.8	62.639	44.825	P31948;F5H783;F5GXD8;H0YGI8	Stress-induced-phosphoprotein 1	STIP1
24.0884	24.1733	24.198	21.1527	24.1246	24.04	21.1657	21.4256	21.7952	18.5415	21.9485	22.3783		4	4	4	56.2	56.2	56.2	11.74	66.524	P31949	Protein S100-A11;Protein S100-A11, N-terminally processed	S100A11
19.1449	19.1307	19.0335	NaN	15.4904	NaN	NaN	NaN	NaN	NaN	NaN	19.9854		2	2	2	2.9	2.9	2.9	109.68	5.4898	P33176;A0A0G2JMZ6;J3KNA1;O60282;Q12840	Kinesin-1 heavy chain;Kinesin-like protein;Kinesin heavy chain isoform 5C;Kinesin heavy chain isoform 5A	KIF5B;KIF5A;KIF5C
22.6628	22.5287	NaN	NaN	18.1374	NaN	NaN	20.4713	18.7435	NaN	19.0099	22.1804	Cell cycle;Cell cycle - yeast;DNA replication;Meiosis - yeast	7	7	7	12.5	12.5	12.5	96.557	21.304	P33991;E5RG31;E5RFJ8	DNA replication licensing factor MCM4	MCM4
21.1932	NaN	NaN	19.8248	18.119	NaN	NaN	NaN	20.9155	NaN	20.4079	21.7749	Cell cycle;Cell cycle - yeast;DNA replication;Meiosis - yeast	6	6	6	13.4	13.4	13.4	81.307	9.3956	P33993;C9J8M6	DNA replication licensing factor MCM7	MCM7
NaN	NaN	NaN	20.1278	NaN	NaN	20.7859	22.6101	22.6085	22.5516	19.9438	20.3571	Cyanoamino acid metabolism;Glycine, serine and threonine metabolism;Methane metabolism;One carbon pool by folate	6	6	6	18.3	18.3	18.3	55.992	27.571	P34897;G3V5L0;H0YIZ0;G3V241;G3V3Y8;G3V4T0;G3V4X0;G3V2W0;G3V2E4;G3V540;G3V2Y4;G3V4W5	Serine hydroxymethyltransferase, mitochondrial;Serine hydroxymethyltransferase	SHMT2
24.3198	24.2912	24.3076	23.1386	22.5684	24.0931	22.0337	22.7141	22.0575	20.5921	23.7082	23.9416	Antigen processing and presentation	14	14	13	23.1	23.1	21.4	94.33	59.247	P34932;A0A087WTS8;A0A087WYC1	Heat shock 70 kDa protein 4	HSPA4
24.3065	23.8943	25.0304	25.0137	23.5869	24.5034	24.5238	25.1969	25.0209	24.7964	22.7	24.3115		14	14	14	68.4	68.4	68.4	29.804	85.1	P35232;C9JW96;C9JZ20;E7ESE2;E9PCW0;D6RBK0	Prohibitin	PHB
24.3076	25.0602	23.8892	22.6393	22.2131	22.2382	22.6947	24.5687	24.4772	21.9639	21.3409	23.4423	Ribosome	3	3	3	39.8	39.8	39.8	14.787	11.214	P35268;K7EP65;K7EKS7;K7ELC4;K7EMH1;K7ERI7;K7EJT5	60S ribosomal protein L22	RPL22
25.8889	25.7577	25.2598	24.9875	25.3196	24.9953	24.1771	24.5517	23.4349	23.4475	24.8226	25.6813	Tight junction;Viral myocarditis	34	34	31	26.5	26.5	24.5	226.53	224.05	P35579;B1AH99;Q5BKV1;M0QY43;B1PS43;P35749;Q7Z406;E7ERA5;P12883;P13535;Q9UKX3;Q9Y623;P13533;P12882;P11055;Q9UKX2	Myosin-9	MYH9
NaN	NaN	NaN	NaN	NaN	NaN	NaN	NaN	NaN	NaN	19.43	19.4166	Tight junction;Viral myocarditis	5	2	2	4.3	2.3	2.3	229	9.9156	P35580	Myosin-10	MYH10
NaN	NaN	NaN	NaN	NaN	NaN	NaN	NaN	NaN	18.4975	20.1412	NaN		1	1	1	2.1	2.1	2.1	102.49	2.8681	P35606	Coatomer subunit beta	COPB2
22.9133	24.2338	24.1157	21.4017	21.3765	19.5034	22.6869	23.9398	24.129	19.6787	23.756	23.3194	Basal transcription factors	5	5	5	15	15	15	53.425	20.947	P35637;H3BPE7;A0A075B7D9;Q92804	RNA-binding protein FUS	FUS
NaN	NaN	NaN	NaN	17.798	NaN	NaN	NaN	NaN	NaN	19.3243	21.0228	Proteasome	3	3	3	8.5	8.5	8.5	48.633	4.2332	P35998	26S protease regulatory subunit 7	PSMC2
19.2315	19.9752	NaN	21.3226	22.636	21.229	16.7453	22.6805	21.9764	21.6191	21.3672	21.0302	Alzheimer's disease;Huntington's disease;Oxidative phosphorylation;Parkinson's disease	6	6	6	27.9	27.9	27.9	32.996	21.469	P36542	ATP synthase subunit gamma, mitochondrial	ATP5C1
24.7691	24.953	23.9016	23.7218	22.8093	25.3004	23.003	25.8333	25.0446	NaN	NaN	24.5332	Ribosome	14	14	14	39.8	39.8	39.8	47.697	33.821	P36578;H3BTP7;H3BU31;H3BM89	60S ribosomal protein L4	RPL4
NaN	NaN	NaN	NaN	18.4729	20.5718	NaN	NaN	NaN	NaN	NaN	NaN	Amino sugar and nucleotide sugar metabolism;Galactose metabolism;Glycolysis / Gluconeogenesis;Pentose phosphate pathway;Purine metabolism;Starch and sucrose metabolism;Streptomycin biosynthesis	2	2	2	7.7	7.7	7.7	61.448	4.9153	P36871	Phosphoglucomutase-1	PGM1
24.9819	25.0452	25.1231	24.075	25.3856	22.3407	22.1488	23.7511	22.0101	22.8363	23.3277	21.3159		13	13	13	80.4	80.4	80.4	22.391	151.2	P37802;X6RJP6;C9J5W6;Q9UI15	Transgelin-2	TAGLN2
20.4332	20.3039	20.625	NaN	NaN	NaN	NaN	NaN	NaN	NaN	19.5852	NaN	Collecting duct acid secretion;Epithelial cell signaling in Helicobacter pylori infection;Oxidative phosphorylation;Phagosome;Rheumatoid arthritis;Vibrio cholerae infection	2	2	2	4.9	4.9	4.9	68.303	5.1354	P38606	V-type proton ATPase catalytic subunit A	ATP6V1A
26.3562	25.9996	26.739	26.9058	24.58	24.0268	24.6667	25.7148	25.7943	26.8476	25.861	24.6715	ko05152;RNA degradation	26	26	26	50.8	50.8	50.8	73.68	245.67	P38646;D6RJI2;H0Y8S0;H0YBG6;D6RA73	Stress-70 protein, mitochondrial	HSPA9
21.557	22.1087	NaN	NaN	NaN	18.1701	22.5797	23.2644	22.9037	NaN	NaN	NaN	mRNA surveillance pathway;RNA transport;Spliceosome	8	6	6	30.2	24.3	24.3	46.871	18.44	P38919	Eukaryotic initiation factor 4A-III;Eukaryotic initiation factor 4A-III, N-terminally processed	EIF4A3
23.197	23.9137	21.7105	23.1098	NaN	NaN	19.0522	19.0577	22.2988	22.5671	NaN	23.153	Ribosome	5	5	5	24.8	24.8	24.8	16.06	18.672	P39019;M0R2L9;M0QXK4;M0QYF7;M0R140;A0A075B6E2	40S ribosomal protein S19	RPS19
22.2958	23.9263	20.584	NaN	19.2193	23.3725	18.7934	23.3826	23.3801	NaN	20.7609	24.2831	Ribosome	5	5	5	16.1	16.1	16.1	46.108	16.046	P39023;G5E9G0;H7C3M2;B5MCW2;H7C422;F8WCR1	60S ribosomal protein L3	RPL3
25.5408	25.5934	25.2747	23.7723	23.0015	23.6949	23.0174	23.8061	22.2668	23.1336	24.375	24.772		16	16	16	42.9	42.9	42.9	58.024	101.09	P40227;Q92526	T-complex protein 1 subunit zeta	CCT6A
21.6529	22.6622	22.1979	21.8484	21.0917	20.7411	NaN	NaN	20.6276	20.8503	22.6269	22.6953	Carbon fixation in photosynthetic organisms;Citrate cycle (TCA cycle);Glyoxylate and dicarboxylate metabolism;Proximal tubule bicarbonate reclamation;Pyruvate metabolism	6	6	6	26	26	26	36.426	35.147	P40925;B9A041;B8ZZ51;C9JF79;C9JRL4;C9JLV6	Malate dehydrogenase, cytoplasmic;Malate dehydrogenase	MDH1
26.7783	26.6092	27.1453	26.9556	25.3986	24.1054	26.8226	27.4602	27.692	27.4032	26.5953	25.3801	Carbon fixation in photosynthetic organisms;Citrate cycle (TCA cycle);Glyoxylate and dicarboxylate metabolism;Pyruvate metabolism	15	15	15	56.2	56.2	56.2	35.503	130.37	P40926;G3XAL0	Malate dehydrogenase, mitochondrial;Malate dehydrogenase	MDH2
20.9557	22.0613	NaN	23.5968	21.5789	19.8132	NaN	22.4621	22.2606	23.4889	24.386	21.5729	Aminobenzoate degradation;Benzoate degradation;beta-Alanine metabolism;Biosynthesis of unsaturated fatty acids;Butanoate metabolism;Caprolactam degradation;Fatty acid elongation in mitochondria;Fatty acid metabolism;Lysine degradation;Propanoate metabolism;Tryptophan metabolism;Valine, leucine and isoleucine degradation	18	18	18	37.6	37.6	37.6	82.999	100.83	P40939;H0YFD6	Trifunctional enzyme subunit alpha, mitochondrial;Long-chain enoyl-CoA hydratase;Long chain 3-hydroxyacyl-CoA dehydrogenase	HADHA
NaN	21.4761	NaN	21.342	21.0293	NaN	NaN	NaN	NaN	NaN	NaN	18.0658	RNA transport	4	4	4	13.3	13.3	13.3	51.109	5.8831	P41091;F8W810;Q2VIR3	Eukaryotic translation initiation factor 2 subunit 3;Putative eukaryotic translation initiation factor 2 subunit 3-like protein	EIF2S3;EIF2S3L
21.9696	23.5103	24.3032	NaN	22.8904	22.4022	NaN	NaN	NaN	NaN	22.3217	21.7166	Aminoacyl-tRNA biosynthesis	8	8	8	20.4	20.4	20.4	83.165	41.619	P41250	Glycine--tRNA ligase	GARS
22.921	23.1934	22.4095	23.4666	19.1944	20.7235	21.1972	20.8435	22.0821	22.9343	21.0366	20.6225		8	8	2	20.7	20.7	8.8	75.491	30.725	P42166	Lamina-associated polypeptide 2, isoform alpha;Thymopoietin;Thymopentin	TMPO
22.7879	23.2481	22.5893	23.2301	22.068	21.0274	22.2455	23.8365	24.6771	23.9776	22.3381	22.7245		37	37	37	36.2	36.2	36.2	157.9	200.07	P42704;B8ZZ38;A0A0C4DG06;C9JCA9;H7C3W8	Leucine-rich PPR motif-containing protein, mitochondrial	LRPPRC
20.1207	20.4945	19.015	21.6607	15.7274	19.0144	NaN	20.1639	19.7187	NaN	NaN	20.5316	Ribosome	2	2	2	15.4	15.4	15.4	14.551	10.002	P42766;F2Z388	60S ribosomal protein L35	RPL35
25.1055	24.6996	24.8319	23.7427	23.7591	25.1151	21.4464	22.8657	21.0599	20.9705	24.2291	24.1806		8	8	5	19.9	19.9	12.3	34.899	54.807	P43358;C9JZJ5;C9J9C2;C9JK50;C9JIR1;P43362;P43361;Q3SYA6;A0A0A0MSA3;P43355;A2A368;A8MXT2;Q96M61;O15480;O60732	Melanoma-associated antigen 4	MAGEA4
NaN	NaN	NaN	NaN	20.6714	NaN	20.8471	NaN	NaN	NaN	20.1701	22.3692	Nicotinate and nicotinamide metabolism	2	2	2	5.9	5.9	5.9	55.52	3.8806	P43490	Nicotinamide phosphoribosyltransferase	NAMPT
20.8279	20.6854	23.2869	19.572	NaN	18.4255	NaN	18.5666	19.4312	18.2123	19.4987	21.0778	Proteasome	4	4	4	19.9	19.9	19.9	47.366	25.591	P43686	26S protease regulatory subunit 6B	PSMC4
23.1921	22.5688	23.1077	22.5334	22.1464	23.1952	21.7848	19.8512	20.0324	20.4774	20.7981	23.8048		12	12	11	23.3	23.3	22.1	95.785	53.028	P45974;F5H571	Ubiquitin carboxyl-terminal hydrolase 5	USP5
19.4557	19.4664	20.0354	NaN	NaN	NaN	18.3213	19.0791	18.3114	19.4633	NaN	17.1706	RNA transport	2	2	2	4.4	4.4	4.4	63.541	4.1734	P46060;B0QYT6;B0QYT5;B0QYT4	Ran GTPase-activating protein 1	RANGAP1
NaN	NaN	NaN	NaN	NaN	20.3509	NaN	NaN	NaN	NaN	19.8967	21.7828		2	2	2	6.3	6.3	6.3	73.457	10.001	P46063;F5GYB7;F5H4P4;F5H3W0;F5H2L2;F8WA66;F8WD97	ATP-dependent DNA helicase Q1	RECQL
20.6431	21.9633	NaN	19.3998	NaN	17.5301	NaN	NaN	NaN	17.4805	NaN	20.9446	Ribosome	3	3	3	11.1	11.1	11.1	34.362	9.4314	P46777;Q5T7N0	60S ribosomal protein L5	RPL5
20.6449	21.6237	NaN	NaN	NaN	22.4876	NaN	20.7005	NaN	NaN	NaN	22.1101	Ribosome	2	2	2	20.6	20.6	20.6	18.565	8.4156	P46778;G3V1B3;M0R181	60S ribosomal protein L21	RPL21
22.3206	22.6234	19.3647	19.3226	22.3499	21.3721	21.6074	22.2358	22.1198	18.9218	19.9848	22.1902	Ribosome	4	4	4	32.7	32.7	32.7	18.898	9.1559	P46783;F6U211;S4R435;Q9NQ39	40S ribosomal protein S10;Putative 40S ribosomal protein S10-like	RPS10;RPS10-NUDT3;RPS10P5
23.1105	22.94	20.3579	22.3932	21.5133	22.1934	NaN	NaN	NaN	18.899	21.5927	22.375	Regulation of actin cytoskeleton	16	16	16	17	17	17	189.25	48.308	P46940;A0A0J9YXZ5;H0YLE8;H0YKA5	Ras GTPase-activating-like protein IQGAP1	IQGAP1
21.9404	21.6057	NaN	NaN	NaN	NaN	NaN	19.9079	NaN	NaN	NaN	NaN	Ribosome	1	1	1	9.4	9.4	9.4	17.752	3.1458	P47914	60S ribosomal protein L29	RPL29
NaN	NaN	NaN	22.4849	20.1444	19.5341	NaN	21.0085	22.8779	22.6612	22.0968	21.2605	Alzheimer's disease;Huntington's disease;Oxidative phosphorylation;Parkinson's disease	5	5	5	29.6	29.6	29.6	23.277	27.587	P48047;H7C0C1;H7C086;H7C068	ATP synthase subunit O, mitochondrial	ATP5O
25.5755	25.6528	26.1596	23.0841	23.7411	24.3884	24.4262	25.2459	24.4805	21.6676	23.8824	25.1779		17	17	17	54.7	54.7	54.7	59.67	81.725	P48643;B7ZAR1;E9PCA1;E7ENZ3;D6RIZ7	T-complex protein 1 subunit epsilon	CCT5
20.4407	20.6675	NaN	17.7081	NaN	19.9466	NaN	NaN	NaN	NaN	NaN	20.4241	Bacterial invasion of epithelial cells;Chemokine signaling pathway;Focal adhesion;Leukocyte transendothelial migration;Regulation of actin cytoskeleton;VEGF signaling pathway	1	1	1	3.4	3.4	3.4	64.505	2.6939	P49023	Paxillin	PXN
21.6909	18.9391	19.6137	19.2499	20.2402	21.8701	NaN	NaN	19.5393	NaN	20.9813	22.7419		7	7	7	16.5	16.5	16.5	85.237	19.883	P49321;Q5T624;E9PI86;E9PRH9;H0YF33;E9PPQ8;H0YDS9	Nuclear autoantigenic sperm protein	NASP
25.7314	25.5253	25.3644	24.196	22.6205	24.3505	21.5548	24.0026	23.6768	23.4989	24.2088	25.601		20	20	20	48.8	48.8	48.8	60.533	73.426	P49368;B4DUR8;E9PRC8;Q5SZX6;E9PQ35;E9PM09;Q5SZX9;Q5SZW8	T-complex protein 1 subunit gamma	CCT3
22.932	21.9624	21.2156	24.0681	18.7875	20.975	21.0979	22.342	22.582	24.1448	22.4407	21.7438	Plant-pathogen interaction	12	12	12	39.8	39.8	39.8	49.541	49.047	P49411;H3BNU3	Elongation factor Tu, mitochondrial	TUFM
19.3409	NaN	NaN	17.3721	21.0907	20.657	NaN	NaN	NaN	NaN	21.3969	21.1626	Aminoacyl-tRNA biosynthesis	6	6	6	12	12	12	106.81	10.57	P49588;H3BPK7	Alanine--tRNA ligase, cytoplasmic	AARS
20.7852	19.7512	19.7026	20.1125	21.6596	NaN	NaN	NaN	NaN	NaN	NaN	16.3531	Proteasome	3	3	3	17.9	17.9	17.9	22.836	9.2841	P49721;A0A087WVV1	Proteasome subunit beta type-2	PSMB2
NaN	20.6952	20.2233	22.5697	20.6547	NaN	21.3738	NaN	21.8353	22.0678	21.3979	NaN	Fatty acid metabolism	11	11	11	26.1	26.1	26.1	70.389	38.146	P49748;G3V1M7;J3QRJ8;K7EQP4;J3QKU9;K7EJW8	Very long-chain specific acyl-CoA dehydrogenase, mitochondrial	ACADVL
19.1466	NaN	NaN	NaN	19.9844	21.4218	NaN	20.4914	NaN	NaN	20.151	20.875	Spliceosome	2	2	2	4.6	4.6	4.6	100.18	6.82	P49756;H0YE46	RNA-binding protein 25	RBM25
23.7652	23.8263	24.5213	19.2928	19.5656	21.7817	20.9387	22.83	NaN	NaN	NaN	19.7772		4	4	4	65.1	65.1	65.1	13.802	15.228	P49773;D6REP8;D6RE99;D6RD60;D6RC06	Histidine triad nucleotide-binding protein 1	HINT1
21.6001	22.0361	21.6001	18.3936	NaN	21.5693	20.3571	20.8592	NaN	17.9941	NaN	20.5206	Drug metabolism - other enzymes;Purine metabolism	3	3	3	8.9	8.9	8.9	76.715	7.0504	P49915	GMP synthase [glutamine-hydrolyzing]	GMPS
23.116	23.7081	23.6735	NaN	22.6172	23.0908	21.7443	20.4332	21.2905	19.8668	20.1025	23.5743		9	9	9	30.1	30.1	30.1	50.663	40.375	P50395;Q5SX87;V9GYF8;Q5SX90;Q5SX86;Q5SX91;P31150;V9GYJ7	Rab GDP dissociation inhibitor beta	GDI2
NaN	NaN	20.0846	NaN	NaN	NaN	17.6033	20.9476	19.9805	NaN	NaN	NaN	Arrhythmogenic right ventricular cardiomyopathy (ARVC);Dilated cardiomyopathy;Hypertrophic cardiomyopathy (HCM)	2	2	2	11.8	11.8	11.8	28.994	2.6806	P50402;Q5HY57	Emerin	EMD
NaN	NaN	NaN	24.5418	22.4801	21.9389	21.5134	21.9424	21.7925	23.6216	22.8034	20.7282		8	8	8	32.8	32.8	32.8	46.44	34.576	P50454;E9PKH2;E9PNX1;E9PK86;E9PMI5;E9PR70;E9PPV6;E9PJH8;E9PIG2;E9PRS3;H0YEP8;E9PQ34;E9PLA6	Serpin H1	SERPINH1
NaN	NaN	21.1814	18.3373	NaN	NaN	NaN	NaN	NaN	17.8937	20.8736	21.2446	Fc gamma R-mediated phagocytosis;Focal adhesion;Leukocyte transendothelial migration	3	3	3	11.3	11.3	11.3	39.829	11.246	P50552;K7ENR7;K7ENL7;K7EM16	Vasodilator-stimulated phosphoprotein	VASP
24.3322	24.3408	24.2565	23.794	21.7448	17.9377	22.4913	23.0066	22.9813	23.3693	23.0387	22.9233		17	17	17	42.9	42.9	42.9	59.62	70.369	P50990;H7C4C8;H7C2U0	T-complex protein 1 subunit theta	CCT8
25.8125	25.7441	25.2838	23.2611	22.1736	23.5606	18.9869	23.4068	21.3458	22.4097	23.1612	24.107		14	14	14	36.9	36.9	36.9	57.924	91.415	P50991	T-complex protein 1 subunit delta	CCT4
23.1813	23.1	23.2171	23.2842	20.2701	16.1852	20.4182	22.2319	22.9051	23.0202	21.625	NaN	Amoebiasis;Endocytosis;ko05152;Phagosome	10	10	10	54.1	54.1	54.1	23.489	38.151	P51149;C9J592;C9J8S3;C9IZZ0;C9J4V0;C9J4S4;C9J7D1	Ras-related protein Rab-7a	RAB7A
NaN	NaN	NaN	19.5887	NaN	NaN	NaN	NaN	NaN	18.936	NaN	19.3573		2	2	2	28.3	28.3	28.3	12.095	5.3763	V9GZ61;V9GYW1;V9GYA7;P51398;V9GYF7;V9GYC9;V9GZ03;V9GYJ9;V9GYL9	28S ribosomal protein S29, mitochondrial	DAP3
NaN	21.0945	21.4218	22.1754	NaN	20.7101	NaN	19.6956	NaN	22.1281	21.0315	NaN	Protein processing in endoplasmic reticulum	4	4	4	30.6	30.6	30.6	18.998	14.992	P51571;A6NLM8	Translocon-associated protein subunit delta	SSR4
22.363	21.8825	21.9572	NaN	18.7098	NaN	NaN	21.8462	19.5257	NaN	NaN	18.9559	Proteasome	2	2	2	13.9	13.9	13.9	37.025	5.7829	P51665;H3BQV2;H3BNT7;H3BTM8	26S proteasome non-ATPase regulatory subunit 7	PSMD7
NaN	NaN	NaN	17.4442	20.5603	NaN	NaN	NaN	NaN	NaN	NaN	NaN		3	2	2	13.8	10.4	10.4	26.788	2.5693	P51858	Hepatoma-derived growth factor	HDGF
23.2034	23.7358	23.2617	21.7665	20.8997	NaN	22.9559	23.3465	23.1046	22.2931	21.4272	NaN	Spliceosome	9	8	8	30.2	30.2	30.2	39.594	32.125	P51991;H7C1J8	Heterogeneous nuclear ribonucleoprotein A3	HNRNPA3
21.0031	20.8136	20.1817	19.3564	20.2545	20.1721	NaN	NaN	NaN	NaN	19.1494	20.032	Glutathione metabolism;Pentose phosphate pathway	5	5	5	17.6	17.6	17.6	53.139	17.818	P52209;K7EMN2;K7EM49;K7EPF6;K7ELN9	6-phosphogluconate dehydrogenase, decarboxylating	PGD
23.4952	22.5149	23.76	23.5005	23.2087	24.4638	23.7325	24.8758	24.8958	23.7191	23.186	24.6394	Spliceosome	20	20	20	40.1	40.1	40.1	77.515	64.172	P52272;A0A087X0X3;M0R019;M0QZM1;M0R2T0;M0R2I7;M0R0N3;M0QYL3;M0QY96;M0QYQ7;M0R0Y6	Heterogeneous nuclear ribonucleoprotein M	HNRNPM
23.9276	24.6507	24.1684	21.6385	NaN	NaN	21.9705	23.1337	22.6761	21.6676	NaN	22.4918		9	9	9	24.2	24.2	24.2	57.861	45.099	P52292;J3QLL0;J3KS65	Importin subunit alpha-1	KPNA2
22.7029	22.6035	22.903	21.3413	20.3541	NaN	21.3349	22.49	22.3098	20.4018	NaN	22.2837		5	3	3	22.4	15.9	15.9	45.671	24.414	P52597	Heterogeneous nuclear ribonucleoprotein F;Heterogeneous nuclear ribonucleoprotein F, N-terminally processed	HNRNPF
22.3852	21.5164	20.1334	22.7519	19.7153	21.7505	19.1269	19.7828	NaN	21.7994	NaN	20.8682		5	5	3	28.3	28.3	18.9	32.922	9.4531	P52907	F-actin-capping protein subunit alpha-1	CAPZA1
NaN	21.2548	NaN	19.1227	21.7671	20.4662	NaN	20.7365	NaN	18.5009	22.0401	19.9323	Carbon fixation pathways in prokaryotes;Citrate cycle (TCA cycle)	8	8	8	10.9	10.9	10.9	120.84	16.37	P53396;K7ESG8	ATP-citrate synthase	ACLY
22.1057	22.4484	22.2558	20.3658	NaN	NaN	NaN	21.8393	21.3763	19.076	20.7639	21.6649		2	2	2	18.9	18.9	18.9	14.395	16.904	P53999	Activated RNA polymerase II transcriptional coactivator p15	SUB1
23.3041	22.0429	22.7873	18.116	23.1157	21.9589	20.7648	NaN	19.491	17.5435	19.711	22.0798	Aminoacyl-tRNA biosynthesis	12	12	12	24.5	24.5	24.5	75.378	37.033	P54136;E5RJM9;E5RH09	Arginine--tRNA ligase, cytoplasmic	RARS
NaN	NaN	21.3608	NaN	22.5915	21.6218	21.0193	20.57	NaN	NaN	NaN	21.4914	Nucleotide excision repair;Protein processing in endoplasmic reticulum	3	3	3	14.9	14.9	14.9	43.171	22.487	P54727;Q5W0S4;H0Y579;Q5W0S5	UV excision repair protein RAD23 homolog B	RAD23B
19.1137	20.868	20.3673	18.1564	19.0905	19.4638	20.9658	21.7094	21.6409	20.5365	20.7421	20.3966	Arginine and proline metabolism	4	4	4	6.4	6.4	6.4	87.301	13.719	P54886	Delta-1-pyrroline-5-carboxylate synthase;Glutamate 5-kinase;Gamma-glutamyl phosphate reductase	ALDH18A1
21.5692	20.5945	21.6931	20.1302	20.0148	20.3006	NaN	NaN	NaN	16.7324	18.858	NaN	RNA transport	4	4	4	11.6	11.6	11.6	49.222	9.9539	P55010;H0YMJ8;H0YM54;H0YLZ1;H0YN40;H0YK11	Eukaryotic translation initiation factor 5	EIF5
23.8986	23.1746	23.9239	18.6252	21.8233	24.3184	21.7295	21.5575	19.5242	NaN	19.3353	23.1654		10	10	10	16.1	16.1	16.1	110.42	52.276	P55060	Exportin-2	CSE1L
25.8508	26.0423	26.1936	25.7733	24.5391	23.9948	23.8877	24.4502	25.0902	24.6676	23.8412	24.6043	Protein processing in endoplasmic reticulum	28	28	28	50.5	50.5	50.5	89.321	205.8	P55072;C9JUP7;C9IZA5	Transitional endoplasmic reticulum ATPase	VCP
NaN	NaN	NaN	20.6476	20.7059	NaN	NaN	22.038	NaN	20.4087	NaN	19.1722	Benzoate degradation;Fatty acid elongation in mitochondria;Fatty acid metabolism;Valine, leucine and isoleucine degradation	5	5	5	13.7	13.7	13.7	51.294	11.472	P55084;B5MD38;C9JEY0;C9JE81;F5GZQ3;C9K0M0	Trifunctional enzyme subunit beta, mitochondrial;3-ketoacyl-CoA thiolase	HADHB
18.6752	21.1416	NaN	NaN	19.3221	NaN	NaN	NaN	NaN	NaN	NaN	NaN	Purine metabolism	2	2	2	15.5	15.5	15.5	40.545	6.2328	P55263	Adenosine kinase	ADK
NaN	NaN	NaN	18.8309	NaN	NaN	NaN	NaN	NaN	17.4724	20.511	21.7598		3	3	3	29.5	29.5	29.5	24.327	5.6713	P55327;E5RFR7;H0YC44;H0YC42;E5RK35	Tumor protein D52	TPD52
NaN	NaN	NaN	16.5576	NaN	NaN	NaN	NaN	NaN	15.897	NaN	21.6145	Protein processing in endoplasmic reticulum;RNA transport	2	2	2	11.5	11.5	11.5	35.54	6.4483	P55735;A8MXL6;A0A0C4DFR6	Protein SEC13 homolog	SEC13
21.2094	22.8384	18.1878	15.6716	19.671	23.1154	20.6017	22.3711	21.0889	NaN	18.7116	23.9159	RNA transport	8	8	8	16	16	16	92.48	18.823	P55884;C9JQN7;C9JZG1	Eukaryotic translation initiation factor 3 subunit B	EIF3B
20.792	20.2107	NaN	NaN	20.423	19.6276	NaN	NaN	NaN	18.2033	19.7581	22.3686	Aminoacyl-tRNA biosynthesis;Selenocompound metabolism	5	5	5	8.3	8.3	8.3	101.11	15.359	P56192;H0YHV5;H0YIC2	Methionine--tRNA ligase, cytoplasmic	MARS
23.823	24.5766	23.5278	20.7491	19.5978	17.9834	20.7548	22.718	21.3836	NaN	19.9206	18.7937	Ribosome biogenesis in eukaryotes	5	5	5	36.7	36.7	36.7	26.599	17.39	P56537;A0A0U1RQV5;B7ZBH1	Eukaryotic translation initiation factor 6	EIF6
27.3203	27.2952	27.8467	25.5893	26.4975	NaN	24.7818	24.4431	25.4235	24.2558	25.9691	NaN	Carbon fixation in photosynthetic organisms;Fructose and mannose metabolism;Glycolysis / Gluconeogenesis;Inositol phosphate metabolism	17	17	17	72	72	72	30.791	107.75	P60174;U3KQF3;U3KPZ0;U3KPS5	Triosephosphate isomerase	TPI1
NaN	20.2296	19.6612	NaN	19.8951	19.6001	19.2401	NaN	19.5537	NaN	20.3708	NaN	Hepatitis C;RNA transport	4	4	4	11	11	11	52.22	13.067	P60228;E5RHS5;E5RGA2;E5RIP5;E5RJ25;H0YBP5;E5RII3;H0YAW4;H0YBR5	Eukaryotic translation initiation factor 3 subunit E	EIF3E
29.1267	29.0096	29.5323	29.8687	28.4844	29.5772	27.5972	28.3719	28.6953	29.0658	28.4291	29.1554	Adherens junction;Arrhythmogenic right ventricular cardiomyopathy (ARVC);Bacterial invasion of epithelial cells;Dilated cardiomyopathy;Focal adhesion;Hypertrophic cardiomyopathy (HCM);Leukocyte transendothelial migration;Pathogenic Escherichia coli infection;Phagosome;Phototransduction - fly;Regulation of actin cytoskeleton;Shigellosis;Tight junction;Vibrio cholerae infection;Viral myocarditis	23	23	1	73.1	73.1	4.5	41.736	210.48	P60709;G5E9R0;E7EVS6;C9JZR7;C9JTX5;C9JUM1;A5A3E0;F8WCH0	Actin, cytoplasmic 1;Actin, cytoplasmic 1, N-terminally processed	ACTB
25.8576	25.9497	25.9142	25.0591	23.8621	25.5598	23.8095	24.1802	23.8228	23.719	23.577	25.4311	RNA transport	20	20	18	65.8	65.8	59.9	46.153	143.4	P60842;J3KT12;J3QS69;J3KTB5;J3QL43;J3QR64;J3KSZ0;J3QLN6;J3KS25;E7EQG2;Q14240;J3KTN0;J3QKZ9;J3KS93;J3KT04;J3QQP0;J3QL52;E7EMV8;J3KSN7;E9PBH4;F8WE11;I3L3H2	Eukaryotic initiation factor 4A-I	EIF4A1
23.8707	23.7519	22.6624	23.0528	18.2526	NaN	18.917	18.815	20.551	21.8752	22.798	22.4666	Ribosome	3	3	3	25.2	25.2	25.2	13.373	11.423	P60866;E5RJX2;E5RIP1;G3XAN0	40S ribosomal protein S20	RPS20
21.0837	20.9829	21.2582	18.9815	16.3714	NaN	NaN	NaN	20.4227	18.1548	21.2703	NaN	Adherens junction;Axon guidance;Bacterial invasion of epithelial cells;Chemokine signaling pathway;Endocytosis;Epithelial cell signaling in Helicobacter pylori infection;Fc gamma R-mediated phagocytosis;Focal adhesion;GnRH signaling pathway;Leukocyte transendothelial migration;MAPK signaling pathway;MAPK signaling pathway - yeast;Neurotrophin signaling pathway;Pancreatic cancer;Pathogenic Escheri…	4	4	4	26.7	26.7	26.7	21.258	14.572	P60953;Q5JYX0	Cell division control protein 42 homolog	CDC42
NaN	NaN	NaN	19.6057	NaN	NaN	18.8818	19.8984	NaN	19.3611	20.249	NaN		1	1	1	5.5	5.5	5.5	22.541	7.1363	P61026	Ras-related protein Rab-10	RAB10
NaN	19.6415	NaN	NaN	NaN	NaN	20.2104	NaN	22.5327	NaN	NaN	NaN		2	2	2	20.9	20.9	20.9	23.897	5.0419	P61106;X6RFL8	Ras-related protein Rab-14	RAB14
23.0734	23.3391	20.4138	21.5899	21.0804	21.6808	NaN	23.2471	NaN	19.343	21.1344	18.9794		5	5	5	24.9	24.9	24.9	47.371	25.627	P61158;B4DXW1;F8WEW2;F8WE84;A0A0A0MTI9;H7C4J1;C9IZN3;Q9C0K3;Q9P1U1	Actin-related protein 3	ACTR3
21.2518	20.6211	NaN	19.6106	20.7213	21.9207	NaN	NaN	NaN	NaN	NaN	21.9773		5	5	5	23.6	23.6	23.6	44.76	19.858	P61160;F5H6T1	Actin-related protein 2	ACTR2
21.4755	21.5002	21.9161	NaN	NaN	NaN	NaN	20.7263	NaN	NaN	20.6423	NaN		1	1	1	5.1	5.1	5.1	37.433	2.7989	R4GMT0;P61163	Alpha-centractin	ACTR1A
24.0828	23.9244	23.6034	21.0204	22.6804	23.17	22.0826	22.8467	16.7078	NaN	22.6096	22.2216	Vibrio cholerae infection	5	5	2	38.1	38.1	9.4	20.697	12.167	P84077;P61204;C9J1Z8;F5H423;P84085;H0YGG7	ADP-ribosylation factor 1;ADP-ribosylation factor 3;ADP-ribosylation factor 5	ARF1;ARF3;ARF5
NaN	21.3061	22.6483	21.9851	21.407	21.2236	22.7764	23.5895	24.0402	22.1231	21.151	NaN	Chemokine signaling pathway;Focal adhesion;Leukocyte transendothelial migration;Long-term potentiation;MAPK signaling pathway;Neurotrophin signaling pathway;Pancreatic secretion;Renal cell carcinoma	4	4	4	27.7	27.7	27.7	20.825	16.475	P61224;E7ESV4;A0A0J9YXB3;F5H7Y6;A6NIZ1;P62834;F8WBC0;F5H4H0;F5GYH7;F5H077;F5GWU8;F5H491;F5H0B7;F5H500;F5H823;B7ZB78;F5GZG1;F5H6R7;F5H004;A0A075B6Q0;F5GYB5;F5GX62	Ras-related protein Rap-1b;Ras-related protein Rap-1b-like protein;Ras-related protein Rap-1A	RAP1B;RAP1A
23.3807	24.1512	21.8956	23.0352	22.375	17.4136	20.4694	23.9211	23.3843	19.7503	21.9306	23.3928	Ribosome	10	10	10	40.9	40.9	40.9	29.945	26.276	P61247;D6RG13;H0Y9Y4;D6RAT0;H0Y8L7;D6RB09;E9PFI5;D6R9B6;D6RAS7;D6RI02;D6RED7;D6RGE0	40S ribosomal protein S3a	RPS3A
21.6518	23.4645	NaN	NaN	19.3381	23.9702	20.4705	23.2178	22.8809	NaN	19.0425	23.9335	Ribosome	6	6	6	31.9	31.9	31.9	24.146	12.194	P61313;E7EQV9;E7ENU7;E7EX53;E7ERA2	60S ribosomal protein L15;Ribosomal protein L15	RPL15
NaN	22.0826	NaN	22.9514	19.55	NaN	NaN	20.4247	21.0691	NaN	NaN	23.8474	Ribosome	5	5	5	38.2	38.2	38.2	15.798	9.2499	P61353;K7ELC7;K7EQQ9;K7ERY7	60S ribosomal protein L27	RPL27
25.0493	25.1046	26.195	25.2163	23.3882	22.5013	23.9989	24.908	25.3023	25.2791	23.9724	20.8758		10	10	10	73.5	73.5	73.5	10.932	45.688	P61604;B8ZZL8;S4R3N1;B8ZZ54	10 kDa heat shock protein, mitochondrial	HSPE1;HSPE1-MOB4
NaN	20.8102	20.6756	NaN	NaN	20.1065	NaN	NaN	18.2677	NaN	NaN	NaN		2	2	2	22.3	22.3	22.3	22.658	5.6948	P61758;B4DWR3	Prefoldin subunit 3	VBP1
NaN	NaN	NaN	NaN	19.9762	NaN	NaN	20.5802	21.4232	NaN	NaN	NaN	Antigen processing and presentation	1	1	1	18.5	18.5	18.5	13.714	1.5633	P61769	Beta-2-microglobulin;Beta-2-microglobulin form pI 5.3	B2M
20.098	20.4599	21.8255	19.1576	NaN	19.5382	NaN	20.6226	NaN	18.291	NaN	NaN		2	2	2	25.2	25.2	25.2	14.478	5.2739	P61970;H3BRV9	Nuclear transport factor 2	NUTF2
26.5856	26.7824	26.8465	24.5008	25.6182	26.1886	26.1295	27.01	26.6946	24.0927	24.4841	26.4193	Spliceosome	13	13	13	44.1	44.1	44.1	50.976	100.48	P61978;Q5T6W2;S4R359;S4R457	Heterogeneous nuclear ribonucleoprotein K	HNRNPK
23.1052	23.2335	22.9644	19.4001	21.0631	22.2882	20.0896	22.1072	20.2346	18.8141	22.7519	23.0907	Cell cycle;Neurotrophin signaling pathway;Oocyte meiosis	5	3	3	22.7	19.4	19.4	28.302	79.779	P61981	14-3-3 protein gamma;14-3-3 protein gamma, N-terminally processed	YWHAG
23.7944	24.8032	24.0398	20.1163	23.7076	23.4643	22.6333	24.114	23.8031	18.9133	23.193	24.3791	Ribosome	6	6	6	43.3	43.3	43.3	22.127	24.044	P62081;B5MCP9	40S ribosomal protein S7	RPS7
23.703	23.7656	23.0486	21.4822	21.6599	21.8304	22.3089	23.3665	22.6737	21.5568	22.7983	21.3958	Focal adhesion;Insulin signaling pathway;Long-term potentiation;Meiosis - yeast;Oocyte meiosis;Regulation of actin cytoskeleton;Vascular smooth muscle contraction	12	12	5	40.6	40.6	15.8	37.512	66.217	P62136;E9PMD7;F8VYE8;F8W0W8;P36873;F8VR82;A0A087WYY5;F5H1L6;F5H037;F8WE71;H0Y3Y6	Serine/threonine-protein phosphatase PP1-alpha catalytic subunit;Serine/threonine-protein phosphatase;Serine/threonine-protein phosphatase PP1-gamma catalytic subunit	PPP1CA;PPP1CC
NaN	NaN	NaN	NaN	NaN	NaN	NaN	NaN	NaN	NaN	20.4566	18.3377	Focal adhesion;Insulin signaling pathway;Long-term potentiation;Meiosis - yeast;Oocyte meiosis;Regulation of actin cytoskeleton;Vascular smooth muscle contraction	9	2	2	34.3	9.2	9.2	37.186	1.5535	P62140;E7ETD8;C9J9S3;C9JP48	Serine/threonine-protein phosphatase PP1-beta catalytic subunit;Serine/threonine-protein phosphatase	PPP1CB
18.9617	21.2819	20.3402	21.9096	18.4696	18.9419	17.041	19.8793	18.9002	17.9993	19.8201	20.7151	Proteasome	6	6	6	19.3	19.3	19.3	49.184	43.817	P62191	26S protease regulatory subunit 4	PSMC1
NaN	21.1904	NaN	18.5965	NaN	18.7217	NaN	NaN	NaN	17.3412	20.7602	20.7706	Proteasome;Ribosome biogenesis in eukaryotes	2	2	2	6.9	6.9	6.9	45.626	14.559	P62195;J3QRR3;J3QRW1;J3QLH6;J3KRP2;J3QSA9;J3QQM1;Q8NB90	26S protease regulatory subunit 8;Spermatogenesis-associated protein 5	PSMC5;SPATA5
22.7897	22.4695	NaN	23.4579	NaN	20.4925	NaN	22.4262	NaN	NaN	NaN	22.4527	Ribosome	4	4	4	26.9	26.9	26.9	24.205	53.807	P62241;Q5JR95	40S ribosomal protein S8	RPS8
23.0595	23.521	20.5588	22.0344	20.59	22.2851	19.3724	23.0575	22.6965	21.4538	21.4547	23.5437	Ribosome	6	6	6	41.1	41.1	41.1	16.445	14.336	P62249;M0R3H0;M0R210;M0R1M5;A0A087WZ27;Q6IPX4;M0QX76	40S ribosomal protein S16	RPS16;ZNF90
24.9965	24.6676	24.2805	23.3574	20.6227	24.3674	20.344	23.2887	22.2471	22.2607	23.6521	22.3911	Aldosterone-regulated sodium reabsorption;Cell cycle;Neurotrophin signaling pathway;Oocyte meiosis;p53 signaling pathway	10	8	8	33.3	30.2	30.2	29.174	51.82	P62258;K7EM20;B4DJF2;I3L3T1;K7EIT4;P31947;I3L0W5;Q4VY20;A0A0J9YWZ2;Q4VY19;A0A0J9YWE8	14-3-3 protein epsilon	YWHAE
NaN	NaN	NaN	21.4115	16.8978	NaN	NaN	21.7187	NaN	NaN	NaN	NaN	Ribosome	4	4	4	45	45	45	16.273	8.5935	P62263;E5RH77;H0YB22	40S ribosomal protein S14	RPS14
NaN	21.5319	NaN	NaN	NaN	NaN	18.9876	21.6201	20.862	NaN	NaN	NaN	Ribosome	2	2	2	26.6	26.6	26.6	15.807	5.364	P62266;D6RD47	40S ribosomal protein S23	RPS23
NaN	21.396	NaN	22.5194	20.8133	20.7427	NaN	22.0891	21.3666	21.3621	20.8491	21.002	Ribosome	3	3	3	21.7	21.7	21.7	17.718	13.057	P62269;J3JS69;A0A0G2JQH2;Q5GGW2	40S ribosomal protein S18	RPS18
23.4495	24.2182	20.3716	22.8008	21.8074	23.4763	21.5519	23.9914	23.0788	21.8982	19.535	24.0114	Ribosome	7	7	7	39.1	39.1	39.1	17.222	24.582	P62277;J3KMX5;E9PS50	40S ribosomal protein S13	RPS13
22.8154	23.5155	19.7474	22.7486	20.1343	21.2697	NaN	21.9876	21.2728	19.6675	21.4023	22.2186	Ribosome	5	5	5	32.3	32.3	32.3	18.431	11.981	P62280;M0QZC5;M0R1H5;M0R1H6	40S ribosomal protein S11	RPS11
20.1655	21.3188	21.3243	20.0633	20.8088	20.5975	NaN	21.4693	23.1271	20.2748	20.7687	19.8186	Spliceosome	2	2	2	39.1	39.1	39.1	10.803	10.501	P62304;A6NHK2	Small nuclear ribonucleoprotein E	SNRPE
NaN	NaN	NaN	20.1066	NaN	21.0729	NaN	NaN	NaN	19.89	NaN	NaN	Spliceosome	2	2	2	33.7	33.7	33.7	9.7251	3.8353	P62306;A0A0B4J254;F8W0W6	Small nuclear ribonucleoprotein F	SNRPF
22.1099	23.3262	20.7178	20.4054	20.6837	22.0962	NaN	23.1364	22.6916	18.3084	NaN	21.4717	Spliceosome;Systemic lupus erythematosus	4	4	4	54.6	54.6	54.6	13.281	10.687	P62314;J3QLI9;J3QLR7	Small nuclear ribonucleoprotein Sm D1	SNRPD1
NaN	NaN	NaN	22.3473	19.2082	NaN	NaN	NaN	20.8652	21.5529	19.5299	NaN	Spliceosome;Systemic lupus erythematosus	2	2	2	15.1	15.1	15.1	13.916	4.2187	P62318	Small nuclear ribonucleoprotein Sm D3	SNRPD3
22.4852	24.4093	NaN	23.7705	NaN	20.0834	NaN	23.1807	22.392	NaN	NaN	22.6792	Ribosome	7	7	7	38.3	38.3	38.3	29.995	32.833	P62424;Q5T8U2;Q5T8U3	60S ribosomal protein L7a	RPL7A
20.3109	18.7419	18.5683	NaN	20.9797	NaN	20.1061	NaN	NaN	NaN	18.4853	NaN		2	2	2	15.3	15.3	15.3	19.463	4.8876	P62633	Cellular nucleic acid-binding protein	CNBP
23.7576	25.0805	20.0095	20.6395	22.215	21.5844	20.047	23.5307	23.0464	18.4771	23.0178	23.4703	Ribosome	12	12	12	47.5	47.5	47.5	29.597	49.651	P62701;C9JEH7;P22090;Q8TD47	40S ribosomal protein S4, X isoform	RPS4X
NaN	NaN	NaN	19.8675	NaN	21.9299	NaN	NaN	NaN	NaN	20.6807	20.2958	Cell cycle - yeast;Chagas disease (American trypanosomiasis);Hepatitis C;Long-term depression;Meiosis - yeast;mRNA surveillance pathway;Oocyte meiosis;TGF-beta signaling pathway;Tight junction;Wnt signaling pathway	2	2	2	11.7	11.7	11.7	35.594	5.4823	P67775;P62714;H0YBN9;H0YC23	Serine/threonine-protein phosphatase 2A catalytic subunit alpha isoform;Serine/threonine-protein phosphatase 2A catalytic subunit beta isoform	PPP2CA;PPP2CB
22.5153	23.4477	NaN	21.4217	20.4202	20.1539	20.879	23.5506	22.9129	NaN	21.9314	NaN	Insulin signaling pathway;mTOR signaling pathway;Ribosome	3	3	3	16.5	16.5	16.5	28.68	25.158	P62753;A2A3R5;A2A3R7	40S ribosomal protein S6	RPS6
28.005	27.8799	27.8957	25.0011	NaN	18.6214	26.6551	25.3783	28.2228	27.0276	NaN	20.2121	Systemic lupus erythematosus	10	10	10	60.2	60.2	60.2	11.367	66.089	P62805	Histone H4	HIST1H4A
NaN	23.5406	NaN	22.129	NaN	20.456	NaN	21.6106	21.3713	21.7049	21.3726	21.9488		5	5	2	37.6	37.6	20.5	22.677	20.406	P62820;E7END7	Ras-related protein Rab-1A	RAB1A
22.0972	22.9379	NaN	23.3243	NaN	19.683	NaN	NaN	NaN	22.4507	NaN	22.3653	Ribosome	4	4	4	24	24	24	13.742	10.79	P62851	40S ribosomal protein S25	RPS25
18.0386	NaN	NaN	19.1304	NaN	NaN	NaN	20.3866	20.9682	21.2557	17.7848	NaN	Chemokine signaling pathway	4	4	2	18.2	18.2	9.4	37.331	14.773	P62879;E7EP32;C9JZN1;C9JIS1;C9JXA5;C9JD14;Q9HAV0	Guanine nucleotide-binding protein G(I)/G(S)/G(T) subunit beta-2	GNB2
21.9393	22.9511	NaN	22.4673	19.4704	NaN	NaN	22.2179	19.8494	NaN	18.3503	23.646	Ribosome	7	7	7	36.9	36.9	36.9	24.831	25.711	P62906	60S ribosomal protein L10a	RPL10A
23.8566	23.7474	22.6764	23.0617	20.2498	21.8199	21.5456	22.3679	22.957	22.7278	23.1426	23.4422	Ribosome	5	5	5	28.1	28.1	28.1	20.252	33.592	P62913;Q5VVC8;Q5VVC9	60S ribosomal protein L11	RPL11
28.2316	27.9361	28.9519	27.643	26.5146	27.182	25.9267	26.5202	26.1297	26.3736	25.7794	26.8987		12	12	12	71.5	71.5	71.5	18.012	83.606	P62937;F8WE65;C9J5S7;E5RIZ5;P0DN26;A0A0H2UH34;A0A0B4J2A2;A0A075B767;A0A075B759;Q9Y536;F5H284;P0DN37	Peptidyl-prolyl cis-trans isomerase A;Peptidyl-prolyl cis-trans isomerase A, N-terminally processed;Peptidyl-prolyl cis-trans isomerase	PPIA
23.3965	22.7396	23.1397	22.8445	20.9717	NaN	20.2499	20.57	NaN	22.8436	20.8992	NaN	Parkinson's disease;PPAR signaling pathway;Ribosome	3	3	3	24.4	24.4	24.4	17.965	24.436	P62979;J3QS39;J3QTR3;F5H6Q2;F5GYU3;F5H2Z3;F5H265;B4DV12;F5H388;F5H747;F5GXK7;J3QKN0;Q5PY61;Q96C32;P62987;P0CG47;P0CG48;J3QSA3;F5GZ39;M0R1V7;M0R1M6;M0R2S1	Ubiquitin-40S ribosomal protein S27a;Ubiquitin;40S ribosomal protein S27a;Ubiquitin-60S ribosomal protein L40;Ubiquitin;60S ribosomal protein L40;Polyubiquitin-B;Ubiquitin;Polyubiquitin-C;Ubiquitin	RPS27A;UBB;UBC;UBA52
22.7407	22.2619	21.7938	20.6293	20.9222	NaN	22.2985	23.1745	23.0206	19.7733	21.4444	NaN	Spliceosome	4	4	4	19.8	19.8	19.8	33.665	10.733	P62995;H7C2L4;H7BXF3	Transformer-2 protein homolog beta	TRA2B
18.8696	18.5124	NaN	18.5047	20.6753	NaN	NaN	NaN	NaN	17.2658	17.7684	NaN	Adherens junction;Amyotrophic lateral sclerosis (ALS);Axon guidance;B cell receptor signaling pathway;Bacterial invasion of epithelial cells;Chemokine signaling pathway;Colorectal cancer;Epithelial cell signaling in Helicobacter pylori infection;Fc epsilon RI signaling pathway;Fc gamma R-mediated phagocytosis;Focal adhesion;Leukocyte transendothelial migration;MAPK signaling pathway;Natural kille…	4	4	4	24.5	24.5	24.5	21.45	8.7575	P63000;P60763;J3KSC4;J3QLK0;B1AH77;B1AH78;B1AH80;P15153	Ras-related C3 botulinum toxin substrate 1;Ras-related C3 botulinum toxin substrate 3	RAC1;RAC3
26.228	25.9891	26.3703	25.436	25.1186	24.3227	22.5074	24.0808	23.8286	24.9183	26.1033	25.8302	Cell cycle;Neurotrophin signaling pathway;Oocyte meiosis	14	14	12	55.9	55.9	52.7	27.745	131.48	P63104;E7EX29;B0AZS6;E7ESK7;B7Z2E6;H0YB80;E5RGE1;E5RIR4;E9PD24;E7EVZ2	14-3-3 protein zeta/delta	YWHAZ
NaN	NaN	NaN	NaN	19.9566	NaN	NaN	NaN	NaN	NaN	19.8175	19.0372		1	1	1	19.6	19.6	19.6	10.2	8.598	Q5VTU3;P63172	Dynein light chain Tctex-type 1	DYNLT1
NaN	22.0584	22.7222	20.3317	NaN	22.1644	20.1609	NaN	21.461	NaN	NaN	22.4327	Ribosome	2	2	2	33.3	33.3	33.3	8.85	6.085	Q8WVC2;Q9BYK1;P63220	40S ribosomal protein S21	RPS21
26.0614	25.2899	26.6098	23.9193	24.1196	25.5511	24.9629	25.4392	24.6562	23.4156	22.5852	25.7768		10	10	10	66.9	66.9	66.9	16.832	62.26	P63241;I3L397;I3L504;Q6IS14;F8WCJ1;C9J7B5;C9J4W5;Q9GZV4	Eukaryotic translation initiation factor 5A-1;Eukaryotic translation initiation factor 5A;Eukaryotic translation initiation factor 5A-1-like;Eukaryotic translation initiation factor 5A-2	EIF5A;EIF5AL1;EIF5A2
24.2474	24.1084	23.8622	21.1542	21.0183	23.0334	21.0882	21.5389	NaN	21.4347	22.5647	23.6674		2	2	2	36.4	36.4	36.4	5.0256	11.064	P63313	Thymosin beta-10	TMSB10
22.3502	22.9023	22.0072	NaN	NaN	NaN	NaN	20.6601	21.1903	NaN	NaN	NaN	Cardiac muscle contraction;Dilated cardiomyopathy;Hypertrophic cardiomyopathy (HCM)	8	1	1	29.8	8.1	8.1	28.521	11.117	P67936;K7ERG3;K7ENT6;K7EMU5;K7EPB9;U3KQK2;K7EPV9	Tropomyosin alpha-4 chain	TPM4
26.5727	26.8919	26.3826	25.8079	24.6701	26.5014	24.3948	25.8709	25.3073	25.8304	23.3374	26.8072	Cardiac muscle contraction;Dilated cardiomyopathy;Hypertrophic cardiomyopathy (HCM);Vascular smooth muscle contraction	14	2	2	33.2	7.2	7.2	42.051	14.617	P68133;P68032;P63267;P62736;A6NL76;F8WB63;B8ZZJ2;C9JFL5;F6UVQ4;F6QUT6	Actin, alpha skeletal muscle;Actin, alpha cardiac muscle 1;Actin, gamma-enteric smooth muscle;Actin, aortic smooth muscle	ACTA1;ACTC1;ACTG2;ACTA2
23.5998	23.6456	24.0088	NaN	20.4129	21.3784	21.7872	22.4989	20.7093	NaN	21.6259	NaN	Parkinson's disease;Ubiquitin mediated proteolysis	2	2	2	24	24	24	17.861	8.939	P68036	Ubiquitin-conjugating enzyme E2 L3	UBE2L3
29.2042	29.4665	29.2517	27.1246	27.6234	28.5016	27.315	28.2621	26.9848	26.2851	27.7839	28.3636	RNA transport	23	23	12	69.3	69.3	39.2	50.14	112.56	P68104;A0A087WVQ9;Q5VTE0;A0A087WV01;Q5JR01;A6PW80	Elongation factor 1-alpha 1;Putative elongation factor 1-alpha-like 3;Elongation factor 1-alpha	EEF1A1;EEF1A1P5
29.228	29.0463	29.1227	27.9636	27.3026	27.6753	26.7927	27.4984	26.9526	26.7093	27.9559	28.3909	Gap junction;Pathogenic Escherichia coli infection;Phagosome	21	21	1	64.7	64.7	2.9	50.151	173.79	P68363;P68366;C9JDS9	Tubulin alpha-1B chain;Tubulin alpha-4A chain	TUBA1B;TUBA4A
28.1412	28.0894	28.6694	26.4093	27.789	28.0019	26.9365	27.069	26.9006	24.8939	26.7771	28.2026	Gap junction;Pathogenic Escherichia coli infection;Phagosome	22	22	1	70.6	70.6	2.7	49.83	271.67	P68371;M0R2D3;M0QY85;M0R0X0;M0QY37;M0QX14;M0R042;M0QZL7;M0R2T4;A0A075B724	Tubulin beta-4B chain	TUBB4B
NaN	NaN	NaN	NaN	20.4115	NaN	18.7641	NaN	NaN	NaN	17.4808	21.6463	Ether lipid metabolism	2	2	2	14.4	14.4	14.4	25.569	6.1243	P68402;J3KNE3	Platelet-activating factor acetylhydrolase IB subunit beta	PAFAH1B2
26.4252	26.2637	26.218	NaN	NaN	NaN	26.5792	25.6046	26.7011	NaN	NaN	NaN	Systemic lupus erythematosus	4	1	1	40.4	23.5	23.5	15.404	11.374	P68431	Histone H3.1	HIST1H3A
NaN	NaN	NaN	NaN	NaN	21.277	20.3769	21.3373	21.2335	NaN	NaN	NaN	Basal transcription factors	4	4	4	7.1	7.1	7.1	112.42	7.4105	P78347	General transcription factor II-I	GTF2I
25.7365	25.5447	25.7739	23.4684	22.96	24.2758	23.6427	24.0279	23.7573	22.9373	24.4945	25.0065		21	21	21	56.3	56.3	56.3	57.488	117.18	P78371;F5GWF6;F8VQ14	T-complex protein 1 subunit beta	CCT2
20.4073	NaN	21.689	NaN	19.2137	20.3677	NaN	19.6829	NaN	NaN	21.1381	19.969	Drug metabolism - cytochrome P450;Glutathione metabolism;Metabolism of xenobiotics by cytochrome P450	2	2	2	9.5	9.5	9.5	23.341	1.7779	Q5TA02;P78417;Q5TA01	Glutathione S-transferase omega-1	GSTO1
23.6808	23.9563	22.687	20.9955	22.4824	23.0014	24.1011	25.5649	25.3816	22.1192	24.9928	23.7927	Cell cycle;Non-homologous end-joining	53	53	53	16.7	16.7	16.7	469.08	216.02	P78527;F5GX40	DNA-dependent protein kinase catalytic subunit	PRKDC
22.782	23.0373	23.0442	23.0047	20.7295	21.3138	20.7854	22.412	22.9861	23.3347	22.8529	21.3156		4	4	4	61.5	61.5	61.5	12.259	38.788	P84090;G3V279	Enhancer of rudimentary homolog	ERH
24.2634	23.9599	24.013	23.3625	22.2682	20.1286	21.5616	23.0482	23.3905	22.9576	22.7855	21.6793	Spliceosome	6	6	5	34.8	34.8	34.8	19.329	27.399	P84103;A0A087X2D0	Serine/arginine-rich splicing factor 3	SRSF3
23.98	24.4612	24.9758	NaN	22.7885	24.1129	24.4389	24.3577	24.5134	NaN	NaN	22.6754		3	3	3	38.2	38.2	38.2	17.17	11.678	P98179	RNA-binding protein 3	RBM3
NaN	NaN	NaN	NaN	NaN	19.3385	NaN	NaN	NaN	NaN	18.2817	19.8314	MAPK signaling pathway;Osteoclast differentiation;Pathways in cancer	2	2	2	3.7	3.7	3.7	96.748	6.2909	Q00653	Nuclear factor NF-kappa-B p100 subunit;Nuclear factor NF-kappa-B p52 subunit	NFKB2
NaN	NaN	NaN	NaN	NaN	21.4653	NaN	NaN	NaN	NaN	19.0733	20.69		2	2	2	8	8	8	25.177	2.732	Q00688	Peptidyl-prolyl cis-trans isomerase FKBP3	FKBP3
25.3898	26.1566	24.1655	25.4924	23.3523	24.7034	23.6846	26.2891	26.1991	24.861	24.9614	25.3137	Spliceosome	17	17	17	29.6	29.6	29.6	90.583	107.51	Q00839;Q5RI18	Heterogeneous nuclear ribonucleoprotein U	HNRNPU
16.9361	18.6886	21.1246	NaN	NaN	NaN	18.5949	NaN	NaN	22.4911	23.2417	NaN	PPAR signaling pathway	5	5	5	43.7	43.7	43.7	15.164	21.24	Q01469;I6L8B7	Fatty acid-binding protein, epidermal	FABP5
23.8813	23.6221	24.3112	NaN	22.7133	22.1679	22.0447	22.6715	21.7264	NaN	23.4413	22.4688		9	9	9	34.9	34.9	34.9	51.901	44.604	Q01518;Q5T0R1;Q5T0R7;Q5T0R6;Q5T0R5;Q5T0R4;Q5T0R3;Q5T0R2;Q5T0R9;B7Z385;A0A087X0J3;A0A087WZ15;E9PDI2;P40123	Adenylyl cyclase-associated protein 1;Adenylyl cyclase-associated protein	CAP1
23.8507	23.8874	23.6036	20.8196	22.2441	17.485	NaN	NaN	NaN	NaN	21.1851	18.7176	Fructose and mannose metabolism;Galactose metabolism;Glycolysis / Gluconeogenesis;Methane metabolism;Pentose phosphate pathway	10	10	10	17.2	17.2	17.2	85.595	69.43	Q01813;B1APP6;H0Y3Y3;B1APP8;Q5VSR5;H0Y757;V9GYV7;V9GY25	ATP-dependent 6-phosphofructokinase, platelet type	PFKP
21.8991	21.679	19.6041	20.9515	NaN	NaN	19.4774	18.4211	NaN	21.1092	21.0137	18.7376		6	6	6	17	17	17	51.804	14.245	Q02790;H0YFG2;F5H1U3	Peptidyl-prolyl cis-trans isomerase FKBP4;Peptidyl-prolyl cis-trans isomerase FKBP4, N-terminally processed	FKBP4
22.6062	23.8369	NaN	21.5123	19.5824	23.0236	21.6045	24.132	23.3259	NaN	18.7013	23.5472	Ribosome	9	9	9	38.9	38.9	38.9	32.728	50.054	Q02878;F8VZ45;U3KQR5;F8VR69;F8VZA3;F8VWR1;F8VU16	60S ribosomal protein L6	RPL6
NaN	NaN	NaN	NaN	NaN	NaN	NaN	NaN	NaN	22.0886	22.8094	NaN	Complement and coagulation cascades	4	4	4	20.6	20.6	20.6	36.978	10.688	Q03405;M0QYS6;M0R383;M0R0Y4;M0QYR6;M0R1I2;M0R0H5	Urokinase plasminogen activator surface receptor	PLAUR
21.5863	NaN	23.4812	NaN	21.2786	NaN	21.2896	21.5884	20.4907	19.1594	22.459	21.3836	MAPK signaling pathway - yeast;Pyruvate metabolism	2	2	2	16.3	16.3	16.3	20.777	12.262	Q04760	Lactoylglutathione lyase	GLO1
20.9771	20.8417	NaN	NaN	NaN	NaN	NaN	NaN	NaN	NaN	NaN	NaN	Cell cycle;Neurotrophin signaling pathway;Oocyte meiosis	3	1	1	13.4	6.1	6.1	28.218	4.2378	Q04917;A2IDB2	14-3-3 protein eta	YWHAH
23.1274	21.6994	21.7719	NaN	23.1655	24.6482	NaN	NaN	NaN	NaN	NaN	NaN	RNA transport	15	4	4	50.8	20.7	20.7	50.47	8.8115	Q05639	Elongation factor 1-alpha 2	EEF1A2
NaN	NaN	NaN	19.8595	22.6229	21.6604	NaN	NaN	NaN	NaN	20.4826	19.3889	Antigen processing and presentation;Proteasome	5	5	5	23.7	23.7	23.7	28.723	13.356	Q06323;H0YLU2;H0YKK6	Proteasome activator complex subunit 1	PSME1
27.1897	27.4016	27.2939	25.519	24.7125	24.7541	24.7375	25.1797	24.5669	25.2466	26.307	26.0359	Peroxisome	15	15	13	81.4	81.4	75.4	22.11	52.243	Q06830;A0A0A0MSI0;A0A0A0MRQ5;P32119	Peroxiredoxin-1	PRDX1
25.6367	25.6081	25.3123	20.6319	NaN	24.4341	23.5777	26.2373	25.1887	23.9668	22.9362	26.7789		8	8	8	51.4	51.4	51.4	31.362	63.578	Q07021;I3L3Q7;I3L3B0	Complement component 1 Q subcomponent-binding protein, mitochondrial	C1QBP
NaN	NaN	NaN	18.3893	NaN	19.7733	NaN	NaN	NaN	17.4821	NaN	NaN	Protein processing in endoplasmic reticulum	1	1	1	2.7	2.7	2.7	66.022	2.2477	Q07065	Cytoskeleton-associated protein 4	CKAP4
21.1207	21.7315	18.0081	NaN	NaN	22.1023	19.4319	21.5456	21.9473	20.7332	21.1921	22.6932		4	4	4	12	12	12	48.227	25.092	Q07666	KH domain-containing, RNA-binding, signal transduction-associated protein 1	KHDRBS1
22.4612	22.2838	20.0066	22.2264	20.9087	19.7012	20.6654	23.2231	22.9415	21.1293	20.4041	22.2787		12	12	12	12.1	12.1	12.1	140.96	38.69	Q08211	ATP-dependent RNA helicase A	DHX9
NaN	NaN	NaN	20.1113	NaN	21.3792	NaN	NaN	NaN	20.058	NaN	21.3049		2	2	2	9.6	9.6	9.6	47.655	5.5812	Q09028;Q5JNZ6;E9PNS6;H0YEU5;Q5JP02;H0YCT5;H0YF10;H0YDK2;E9PC52;Q16576	Histone-binding protein RBBP4;Histone-binding protein RBBP7	RBBP4;RBBP7
26.1761	26.1415	25.7385	22.3083	22.7417	23.0093	23.73	24.9438	24.4087	20.1123	23.2838	21.919		32	32	32	18.1	18.1	18.1	629.09	64.875	Q09666	Neuroblast differentiation-associated protein AHNAK	AHNAK
22.5852	21.8446	20.8341	20.7446	NaN	NaN	NaN	21.1558	NaN	20.0713	NaN	20.6646		4	4	4	25.4	25.4	25.4	40.282	27.513	Q12792;F8VS81	Twinfilin-1	TWF1
NaN	NaN	NaN	NaN	NaN	NaN	NaN	18.497	18.7396	18.9027	NaN	20.3495		3	3	3	12.2	12.2	12.2	34.352	8.5271	Q12904;D6R937	Aminoacyl tRNA synthase complex-interacting multifunctional protein 1;Endothelial monocyte-activating polypeptide 2	AIMP1
23.2575	23.4998	23.3593	21.2001	22.2039	20.8289	22.6695	24.6489	24.6709	23.6127	23.6271	22.4291		12	12	12	52.3	52.3	52.3	43.062	43.233	Q12905;B4DY09;X6R6Z1;A0A0A0MRL0	Interleukin enhancer-binding factor 2	ILF2
20.4334	22.4662	22.2238	18.4897	20.7633	NaN	21.1001	21.9544	23.04	21.3468	22.044	21.9621		12	12	11	18.5	18.5	17.2	95.337	25.686	Q12906;K7EKJ9;K7ER69;K7EQR9;K7EJ09;K7EKY0;K7ERM6;K7ENK6;K7EM82	Interleukin enhancer-binding factor 3	ILF3
21.133	22.0675	21.6745	20.8022	NaN	NaN	NaN	21.4982	21.5403	20.9288	NaN	NaN		7	7	7	16.6	16.6	16.6	80.109	25.534	Q12931;I3L0K7;I3L253;I3L2D5;I3L239	Heat shock protein 75 kDa, mitochondrial	TRAP1
NaN	NaN	NaN	23.5057	18.7035	22.1891	20.8085	21.9075	22.2836	24.1936	23.1591	22.4018	Peroxisome	9	7	7	42.1	32.6	32.6	35.816	44.403	Q13011;M0R248;M0QZW4	Delta(3,5)-Delta(2,4)-dienoyl-CoA isomerase, mitochondrial	ECH1
24.1612	24.0264	23.7565	NaN	NaN	21.0433	NaN	NaN	NaN	NaN	22.137	22.6581		3	1	1	36.8	29.1	29.1	12.892	5.3626	Q13070;Q13069;Q13067;A6NER3;A6NDE8;A1L429	G antigen 6;G antigen 5;G antigen 3;G antigen 12J;G antigen 12H;G antigen 12B/C/D/E	GAGE6;GAGE5;GAGE3;GAGE12J;GAGE12H;GAGE12B
NaN	NaN	NaN	20.219	19.9105	NaN	17.5573	21.9316	20.4396	17.934	NaN	21.4091		5	5	5	21.7	21.7	21.7	44.739	16.886	Q13148;A0A087WX29;B1AKP7;G3V162;A0A087X260;A0A087WYY0;A0A087WXQ5;A0A087WV68;A0A087WYE7;A0A087WZC9;A0A087WW61;A0A087WX67;A0A087WXV3;K7EJM5;K7EN94;A0A087WTZ4;K7EL26;A0A087WZM1;K7EJ99;A0A0A0MSV7	TAR DNA-binding protein 43	TARDBP
25.004	25.1133	24.7315	20.2008	22.5453	19.1008	23.0481	24.6901	24.229	21.1689	24.7856	21.2048		2	2	2	7.5	7.5	7.5	30.84	14.942	Q13151	Heterogeneous nuclear ribonucleoprotein A0	HNRNPA0
NaN	21.0305	21.9243	19.2619	20.0925	NaN	20.8963	22.263	22.3505	19.1829	20.2526	NaN		3	3	2	31.1	31.1	22.4	20.811	10.596	Q13185;S4R2Y4;K7ELA4;B5MD17;P45973	Chromobox protein homolog 3	CBX3
23.2144	23.2824	23.2911	17.0101	22.11	23.4631	22.0981	21.6558	21.8268	15.9834	20.1579	23.355	Proteasome	14	14	14	24.6	24.6	24.6	100.2	36.459	Q13200;H7C2Q3;C9JPC0;H7C1H2	26S proteasome non-ATPase regulatory subunit 2	PSMD2
21.8724	21.6039	21.5164	20.9179	16.8921	NaN	NaN	21.6746	20.3903	21.1802	21.4782	19.7383		5	5	5	8.9	8.9	8.9	88.549	11.06	Q13263;M0R0K9;M0R3C0	Transcription intermediary factor 1-beta	TRIM28
21.9921	22.078	23.382	20.1713	20.5227	20.9516	NaN	18.726	20.3259	19.5404	NaN	22.4799		8	8	7	26.6	26.6	24	52.164	16.582	Q13283;E5RIZ6;E5RI46;E5RIF8;E5RH42;E5RJU8;E5RH00;D6R9X5;D6R9A4;D6RBM9;D6REX8;D6RBR0;D6RE13;D6RBW8;D6RGJ4;D6RAC7;D6RB17	Ras GTPase-activating protein-binding protein 1	G3BP1
22.8185	NaN	22.167	19.2498	NaN	20.3177	19.1545	20.4207	20.1316	18.6301	NaN	19.5878	RNA transport	5	5	5	25.2	25.2	25.2	36.501	12.929	Q13347	Eukaryotic translation initiation factor 3 subunit I	EIF3I
22.913	23.3507	24.0937	NaN	23.2526	24.3676	NaN	21.9331	21.0465	NaN	20.1822	23.6391	Gap junction;Pathogenic Escherichia coli infection;Phagosome	16	7	7	57.3	34	34	50.432	35.766	Q13509;A0A0B4J269;G3V2A3;G3V5W4;G3V2R8;G3V3R4;G3V2N6;G3V542;G3V3J6;G3V3W7	Tubulin beta-3 chain	TUBB3
NaN	NaN	NaN	NaN	NaN	NaN	18.8517	NaN	20.1541	NaN	NaN	NaN	Spliceosome	1	1	1	5	5	5	32.688	4.681	Q13595	Transformer-2 protein homolog alpha	TRA2A
NaN	NaN	NaN	NaN	19.9161	NaN	NaN	NaN	NaN	18.437	20.3808	NaN	N-Glycan biosynthesis;Protein processing in endoplasmic reticulum	2	2	2	3.6	3.6	3.6	91.916	4.4823	Q13724;C9J8D4	Mannosyl-oligosaccharide glucosidase	MOGS
24.1061	24.0922	24.2663	21.195	23.1813	22.1924	22.3276	24.5659	23.9271	22.0843	22.8719	22.7058	mRNA surveillance pathway;RNA transport;Spliceosome	11	11	4	40	40	17.1	48.991	53.676	Q13838;Q5STU3;A0A0G2JJZ9;F6WLT2;H0Y400;F6S4E6;A0A0A0MT12;F6TRA5;F6UJC5;H0YCC6	Spliceosome RNA helicase DDX39B	DDX39B
23.7412	NaN	21.2456	NaN	21.1802	20.7395	19.9642	20.1347	20.5466	NaN	19.3671	21.3339		2	2	2	30.3	30.3	30.3	15.945	20.269	Q14019;H3BT58	Coactosin-like protein	COTL1
21.2388	19.3542	22.1393	18.8368	21.5602	NaN	21.6966	21.7392	19.7172	18.4871	20.9548	19.9974	RNA transport	8	8	8	6.9	6.9	6.9	166.57	39.667	Q14152	Eukaryotic translation initiation factor 3 subunit A	EIF3A
24.0852	23.0712	22.473	21.7263	22.6208	23.0238	22.2519	21.6753	20.9544	18.2976	21.7071	22.5538	Phagosome;Vasopressin-regulated water reabsorption	29	29	29	10.7	10.7	10.7	532.4	90.132	Q14204;H0YJ21	Cytoplasmic dynein 1 heavy chain 1	DYNC1H1
17.0349	17.2011	22.0632	NaN	16.3693	NaN	NaN	NaN	20.7918	NaN	16.7885	NaN	Bacterial invasion of epithelial cells;Pathogenic Escherichia coli infection;Shigellosis;Tight junction	2	2	2	5.8	5.8	5.8	61.585	6.3483	Q14247	Src substrate cortactin	CTTN
19.9701	20.1226	NaN	NaN	18.18	NaN	NaN	NaN	NaN	NaN	NaN	NaN	RIG-I-like receptor signaling pathway	2	2	2	4.8	4.8	4.8	70.973	12.141	Q14258	E3 ubiquitin/ISG15 ligase TRIM25	TRIM25
25.7127	25.0382	26.4764	18.0163	22.8384	19.9191	21.7128	22.6397	23.3872	NaN	20.5853	19.094	Focal adhesion;MAPK signaling pathway	27	27	22	15.7	15.7	12.9	291.02	80.511	Q14315	Filamin-C	FLNC
18.1984	NaN	NaN	NaN	18.7167	NaN	20.6431	21.4442	20.6638	NaN	19.2224	NaN		3	3	3	8.1	8.1	8.1	59.379	8.3507	Q14498;H0Y4X3;Q5QP23;A0A0U1RQH7;G3XAC6	RNA-binding protein 39	RBM39
21.8531	20.2986	NaN	NaN	NaN	NaN	17.7831	NaN	19.6208	NaN	18.5988	NaN	Cell cycle;Cell cycle - yeast;DNA replication;Meiosis - yeast	3	3	3	4.9	4.9	4.9	92.888	5.4292	Q14566	DNA replication licensing factor MCM6	MCM6
19.4291	18.9585	NaN	NaN	NaN	NaN	19.5178	NaN	19.9783	NaN	NaN	18.5067		1	1	1	0.8	0.8	0.8	226.66	1.9693	Q14676	Mediator of DNA damage checkpoint protein 1	MDC1
NaN	18.5331	22.9844	24.0678	23.4937	24.3137	22.4998	23.4376	23.5796	24.1374	22.4145	22.3341	N-Glycan biosynthesis;Protein processing in endoplasmic reticulum	22	22	22	37	37	37	106.87	59.522	Q14697;F5H6X6;E9PKU7;E9PNH1	Neutral alpha-glucosidase AB	GANAB
NaN	NaN	NaN	NaN	20.1148	22.4648	NaN	NaN	NaN	NaN	18.0515	21.3534		5	5	5	15.1	15.1	15.1	99.326	17.091	Q14764;I3L155;H3BQK6	Major vault protein	MVP
25.059	24.8976	25.1254	22.7115	23.6608	22.9056	23.5175	24.3859	23.6617	22.381	22.5979	22.8186	RNA transport	19	19	19	30.9	30.9	30.9	97.169	119.06	Q14974;J3KTM9;J3QR48;J3QRG4;J3QKQ5	Importin subunit beta-1	KPNB1
19.3577	18.9582	19.374	NaN	17.014	NaN	18.0864	NaN	17.8483	20.8133	NaN	NaN	Cell cycle - yeast	3	3	3	2.6	2.6	2.6	157.18	6.3239	Q15021;E7EN77	Condensin complex subunit 1	NCAPD2
NaN	20.7188	20.3534	21.094	14.9538	20.6147	21.308	21.4411	20.9282	20.8715	18.199	18.8134	Spliceosome	10	9	9	16.2	15.1	15.1	109.43	19.379	Q15029;K7EP67;K7EIT3	116 kDa U5 small nuclear ribonucleoprotein component	EFTUD2
NaN	NaN	NaN	NaN	20.7938	NaN	NaN	NaN	21.0391	NaN	18.7474	21.1302	Aminoacyl-tRNA biosynthesis	3	3	3	9.2	9.2	9.2	68.047	6.2496	Q15046;J3KRL2;H3BPV7;H3BVA8	Lysine--tRNA ligase	KARS
21.1043	21.1412	20.9901	18.7042	NaN	NaN	20.7027	22.3287	NaN	NaN	NaN	20.0633		3	3	3	13.2	13.2	13.2	41.193	12.493	Q15050	Ribosome biogenesis regulatory protein homolog	RRS1
22.4794	22.5262	23.8589	18.425	NaN	24.1097	NaN	21.7221	21.4852	NaN	NaN	23.6137		4	4	4	22.2	22.2	22.2	27.385	42.698	Q15056	Eukaryotic translation initiation factor 4H	EIF4H
23.6801	24.1524	24.3155	24.9268	22.2077	21.7946	21.7917	23.3696	23.8148	24.6337	24.0182	22.9305	Protein processing in endoplasmic reticulum	12	12	12	38.4	38.4	38.4	48.121	73.38	Q15084	Protein disulfide-isomerase A6	PDIA6
NaN	19.5791	20.3764	NaN	22.326	NaN	18.8901	NaN	NaN	NaN	20.6105	NaN	Ether lipid metabolism	5	5	5	31.6	31.6	31.6	25.734	11.751	Q15102;M0R1K3;M0R389;M0QXS6;M0R323;M0QZT2	Platelet-activating factor acetylhydrolase IB subunit gamma	PAFAH1B3
22.7964	22.8846	22.5097	24.7494	23.852	23.069	21.5955	23.3402	23.0259	24.1288	24.3164	23.4786		49	49	49	14.1	14.1	14.1	531.78	162.95	Q15149;E9PMV1;E9PKG0;H0YDN1;E9PQ28;E9PIA2;A0A075B730;A0A087X1U6;P58107	Plectin	PLEC
19.7294	20.0324	21.727	17.0694	NaN	21.7675	NaN	NaN	NaN	16.1462	NaN	19.2428	Oxidative phosphorylation	4	4	4	24.9	24.9	24.9	32.66	7.2042	Q15181;Q5SQT6	Inorganic pyrophosphatase	PPA1
24.2799	23.8048	23.9655	23.8714	21.0778	23.0524	22.0975	24.1328	23.4499	24.0597	23.1084	24.1145		12	12	12	36.7	36.7	36.7	54.231	82.005	Q15233;C9IZL7;C9JYS8;H7C367;C9J4X2	Non-POU domain-containing octamer-binding protein	NONO
24.3093	24.5655	24.4694	20.477	23.6547	23.4772	22.7312	23.0216	22.71	19.9376	22.2998	22.6166	Spliceosome	6	4	4	29.5	20.8	20.8	37.497	21.997	Q15365	Poly(rC)-binding protein 1	PCBP1
NaN	22.1307	NaN	18.2051	21.4638	21.7881	21.2656	21.7142	NaN	17.5797	NaN	21.2997	Pathways in cancer;Renal cell carcinoma;Ubiquitin mediated proteolysis	3	3	3	33.9	33.9	33.9	13.133	5.2165	Q15370;A0A0B4J296;B8ZZU8;I3L0M9	Transcription elongation factor B polypeptide 2	TCEB2
NaN	20.8556	NaN	17.9185	20.8751	20.6507	21.193	21.4326	20.8296	20.7603	20.4874	20.5962	Spliceosome	8	8	8	9	9	9	135.58	23.418	Q15393	Splicing factor 3B subunit 3	SF3B3
19.4194	19.6756	20.426	19.9295	22.0444	16.0279	18.4192	20.8439	19.2817	16.6155	21.2969	16.0234		6	6	5	28.6	28.6	25.2	36.413	29.228	Q15417;E9PDU6	Calponin-3;Calponin	CNN3
20.756	21.0247	21.473	NaN	NaN	22.5612	20.9785	22.0627	21.5548	NaN	NaN	21.1879	Spliceosome	1	1	1	5.4	5.4	5.4	44.385	3.2184	Q15427	Splicing factor 3B subunit 4	SF3B4
NaN	NaN	18.4599	NaN	20.4795	NaN	16.9297	17.739	18.4649	18.0858	18.8704	NaN	Spliceosome	3	3	3	4.7	4.7	4.7	88.885	5.3778	Q15459	Splicing factor 3A subunit 1	SF3A1
NaN	NaN	NaN	16.5043	NaN	NaN	NaN	NaN	NaN	16.2928	NaN	16.922	RNA degradation	1	1	1	0.7	0.7	0.7	137.75	1.7099	Q15477	Helicase SKI2W	SKIV2L
18.4228	NaN	NaN	NaN	19.7812	NaN	20.213	NaN	NaN	NaN	18.4328	17.5353		3	3	3	22.4	22.4	22.4	26.183	4.0135	Q15631;A0A0J9YVW2;E9PGT1;H7C1D4	Translin	TSN
NaN	21.3027	NaN	NaN	21.2914	22.9286	21.2363	22.1611	22.3069	NaN	20.1618	20.8522		6	6	6	14.2	14.2	14.2	68.329	11.633	Q15637;C9J792;F8WEV5	Splicing factor 1	SF1
23.871	23.9989	24.2638	20.0761	21.7658	20.5095	20.605	21.2721	NaN	18.3733	NaN	20.5938		7	7	7	32.1	32.1	32.1	29.999	25.1	Q15691	Microtubule-associated protein RP/EB family member 1	MAPRE1
18.0094	18.1314	17.5289	21.4272	20.3594	20.4398	21.0331	22.5966	17.8101	21.9433	17.6601	21.9229		5	5	5	19.3	19.3	19.3	36.091	24.004	Q15717;M0QZR9	ELAV-like protein 1	ELAVL1
NaN	21.0431	NaN	21.3787	20.7238	17.6147	NaN	NaN	NaN	20.9489	20.58	18.3668	Endocrine and other factor-regulated calcium reabsorption;Endocytosis;Pancreatic secretion;Vasopressin-regulated water reabsorption	4	4	4	25.7	25.7	25.7	24.488	21.288	Q15907;H3BMH2;H3BSC1;P62491;M0R2D0;B4DQU5	Ras-related protein Rab-11B;Ras-related protein Rab-11A	RAB11B;RAB11A
22.4452	24.2919	23.4477	22.18	22.9295	22.4775	22.1964	21.885	21.4894	NaN	21.3162	22.9157	Focal adhesion	11	11	11	32.2	32.2	32.2	61.277	37.536	Q15942;H0Y2Y8;C9IZ41;H7C3D3;C9JJK5;H7C3R3	Zyxin	ZYX
24.8552	24.2698	22.1834	NaN	NaN	20.0688	21.785	20.824	20.0179	19.6605	NaN	22.9069	Amino sugar and nucleotide sugar metabolism	13	13	13	34.9	34.9	34.9	58.768	70.047	Q16222;Q3KQV9	UDP-N-acetylhexosamine pyrophosphorylase;UDP-N-acetylgalactosamine pyrophosphorylase;UDP-N-acetylglucosamine pyrophosphorylase	UAP1
NaN	NaN	NaN	19.3158	NaN	20.8933	20.2995	NaN	NaN	17.7642	NaN	20.6649	Nucleotide excision repair;Ubiquitin mediated proteolysis	1	1	1	2.1	2.1	2.1	126.97	2.6463	Q16531	DNA damage-binding protein 1	DDB1
22.1835	22.5079	22.2337	22.3218	17.5795	NaN	19.7483	20.4748	19.5007	21.9822	21.0836	18.9815		6	6	6	13.1	13.1	13.1	71.428	15.55	Q16643;D6R9W4;D6RFI1;D6RCR4;D6R9Q9	Drebrin	DBN1
24.0547	23.6061	24.2541	22.5795	21.9759	21.0559	20.3212	19.7735	21.4536	19.8688	23.211	21.578		10	10	10	26.8	26.8	26.8	54.529	39.534	Q16658;C9JPH9;C9JFC0;A0A0A0MSB2	Fascin	FSCN1
NaN	NaN	NaN	18.8939	NaN	NaN	NaN	NaN	18.9203	20.4227	19.76	NaN		2	2	2	5.4	5.4	5.4	36.067	5.601	Q16698;E5RID6;E5RJG7;E5RFV2	2,4-dienoyl-CoA reductase, mitochondrial	DECR1
28.3889	28.5089	28.6922	26.7605	27.1481	25.6667	28.3466	28.0052	29.2283	27.171	27.1139	26.5858	Systemic lupus erythematosus	5	5	1	55	55	22.5	13.988	44.28	Q16777;Q6FI13	Histone H2A type 2-C;Histone H2A type 2-A	HIST2H2AC;HIST2H2AA3
NaN	NaN	NaN	NaN	NaN	NaN	20.2669	20.4841	20.7909	NaN	NaN	NaN	Alzheimer's disease;Huntington's disease;Oxidative phosphorylation;Parkinson's disease	2	2	2	8.5	8.5	8.5	42.509	2.9022	Q16795;F5H0J3	NADH dehydrogenase [ubiquinone] 1 alpha subcomplex subunit 9, mitochondrial	NDUFA9
23.1195	22.7278	24.0939	19.6925	21.6234	19.3263	21.5041	22.9959	23.2507	20.7476	NaN	19.6864		1	1	1	1.9	1.9	1.9	42.868	1.5456	Q2TAM5		RELA
19.8103	NaN	NaN	NaN	NaN	NaN	NaN	20.0254	19.4069	NaN	NaN	NaN		1	1	1	1.9	1.9	1.9	57.543	2.0489	Q2TAY7	WD40 repeat-containing protein SMU1;WD40 repeat-containing protein SMU1, N-terminally processed	SMU1
26.6919	26.449	26.2397	25.4729	24.5873	25.5024	24.6983	25.5237	25.0472	25.0888	25.7854	25.3188	Purine metabolism;Pyrimidine metabolism	15	15	2	67.8	67.8	6.5	32.642	64.378	Q32Q12;P22392;J3KPD9;E7ERL0;F6XY72	Nucleoside diphosphate kinase;Nucleoside diphosphate kinase B	NME1-NME2;NME2;NME1
20.2572	19.8081	NaN	17.6012	NaN	NaN	NaN	NaN	NaN	17.0141	18.5986	NaN		1	1	1	1.9	1.9	1.9	92.819	2.3268	Q3KQU3	MAP7 domain-containing protein 1	MAP7D1
23.935	24.6556	24.6285	22.4511	23.2012	23.6518	23.451	23.9328	23.286	20.8293	NaN	23.3258	Gap junction;Pathogenic Escherichia coli infection;Phagosome	6	1	1	20.3	7.2	7.2	49.775	8.0444	Q3ZCM7;A0A075B736;Q5SQY0	Tubulin beta-8 chain	TUBB8
NaN	NaN	NaN	NaN	20.3539	NaN	20.7143	21.36	21.2821	21.6637	19.3358	NaN		4	4	4	13.6	13.6	13.6	39.646	14.216	Q3ZCQ8;M0R0C3;M0R2F8;M0R047;M0R003	Mitochondrial import inner membrane translocase subunit TIM50	TIMM50
25.8428	25.5354	NaN	27.0017	23.4172	25.2209	23.1394	24.2495	24.3264	26.375	NaN	25.738		6	1	1	17.6	4.8	4.8	42.003	2.0593	Q562R1	Beta-actin-like protein 2	ACTBL2
22.3241	22.5293	24.6272	21.1482	24.1935	23.6855	22.6833	22.222	22.7737	18.3803	NaN	22.4191		13	2	2	21.5	4.5	4.5	44.348	24.32	Q58FF8	Putative heat shock protein HSP 90-beta 2	HSP90AB2P
NaN	NaN	NaN	20.0022	NaN	NaN	19.5193	NaN	21.1748	NaN	NaN	NaN		2	2	2	12.2	12.2	12.2	18.717	7.0874	Q5QPM0;Q5QPL9;Q9UKM9;Q5QPM2;Q5QPM1	RNA-binding protein Raly	RALY
20.716	20.8359	21.7494	19.5987	NaN	18.7632	NaN	NaN	NaN	NaN	NaN	19.1991		1	1	1	18.5	18.5	18.5	15.512	5.9648	Q9Y6H1;Q5T1J5	Coiled-coil-helix-coiled-coil-helix domain-containing protein 2;Putative coiled-coil-helix-coiled-coil-helix domain-containing protein CHCHD2P9, mitochondrial	CHCHD2;CHCHD2P9
NaN	NaN	NaN	17.516	NaN	NaN	NaN	NaN	NaN	15.6157	NaN	18.7057		3	3	3	7.5	7.5	7.5	46.379	6.088	Q5T2N8;Q5SV16;H0Y2W2;Q9NVI7;J3QSF3;Q5T9A4	ATPase family AAA domain-containing protein 3C;ATPase family AAA domain-containing protein 3A	ATAD3C;ATAD3A
19.2079	NaN	NaN	NaN	NaN	NaN	19.0927	18.8499	19.3769	NaN	NaN	NaN	Ribosome biogenesis in eukaryotes	1	1	1	0.7	0.7	0.7	233.27	4.56	Q5T3Q7;Q9H583	HEAT repeat-containing protein 1;HEAT repeat-containing protein 1, N-terminally processed	HEATR1
NaN	NaN	NaN	NaN	NaN	NaN	NaN	17.4696	17.5737	NaN	NaN	NaN	Spliceosome	1	1	1	4.2	4.2	4.2	24.176	1.3321	Q5W011;Q5W010;Q96I25	Splicing factor 45	RBM17
18.9816	19.8035	NaN	NaN	NaN	NaN	18.8739	20.8321	19.8171	NaN	NaN	NaN		1	1	1	7.3	7.3	7.3	28.661	2.9265	Q6DKI1	60S ribosomal protein L7-like 1	RPL7L1
21.6802	NaN	NaN	NaN	NaN	NaN	22.4033	21.4645	23.6709	NaN	NaN	NaN		4	1	1	19.5	9.1	9.1	18.018	1.2708	Q6DRA6;Q6DN03	Putative histone H2B type 2-D;Putative histone H2B type 2-C	HIST2H2BD;HIST2H2BC
NaN	NaN	NaN	16.3942	NaN	NaN	NaN	NaN	NaN	15.8016	17.4855	NaN		1	1	1	3.4	3.4	3.4	53.354	3.7526	Q6NUK1	Calcium-binding mitochondrial carrier protein SCaMC-1	SLC25A24
20.1499	21.4413	NaN	NaN	20.1385	21.5682	19.3638	23.1682	22.5296	NaN	NaN	22.0597	Spliceosome	11	11	11	7.8	7.8	7.8	273.6	57.514	Q6P2Q9;I3L0J9;I3L3Z8	Pre-mRNA-processing-splicing factor 8	PRPF8
23.1954	22.1043	NaN	20.9852	NaN	NaN	NaN	20.8709	NaN	NaN	NaN	NaN		10	1	1	10.3	1.7	1.7	121.36	1.503	Q6S8J3;P0CG38;P0CG39;Q9BYX7	POTE ankyrin domain family member E;POTE ankyrin domain family member I;POTE ankyrin domain family member J	POTEE;POTEI;POTEJ
26.9417	26.7949	26.1043	21.2467	16.0284	21.7319	26.652	25.3635	27.2293	21.9837	NaN	NaN	Systemic lupus erythematosus	4	4	1	40.4	40.4	23.5	15.388	16.932	Q71DI3	Histone H3.2	HIST2H3A
24.8034	24.4074	24.5211	22.6459	23.0909	22.5417	21.9009	23.3681	22.6924	21.0987	23.7127	23.2242	Gap junction;Pathogenic Escherichia coli infection;Phagosome	21	2	1	64.7	6	3.1	50.135	11.089	Q71U36;Q13748;Q6PEY2;F8VQQ4;V9GZ17	Tubulin alpha-1A chain;Tubulin alpha-3C/D chain;Tubulin alpha-3E chain	TUBA1A;TUBA3C;TUBA3E
21.187	NaN	NaN	20.1994	19.7131	20.8976	NaN	NaN	NaN	NaN	20.7092	21.4935		4	4	4	7.3	7.3	7.3	102	11.541	Q7KZF4;H7C597	Staphylococcal nuclease domain-containing protein 1	SND1
NaN	NaN	19.3345	NaN	19.6673	17.9832	NaN	NaN	NaN	NaN	17.797	NaN	Ubiquitin mediated proteolysis	2	2	2	0.6	0.6	0.6	481.89	5.2561	Q7Z6Z7	E3 ubiquitin-protein ligase HUWE1	HUWE1
NaN	NaN	NaN	NaN	NaN	NaN	NaN	NaN	NaN	20.0934	19.1973	NaN		5	5	5	5.3	5.3	5.3	156.27	6.0262	Q86UP2;G3V4Y7;H0YJZ8;G3V5G2;H0YJP2;B7Z6P3	Kinectin	KTN1
21.8824	22.2031	23.2618	21.1395	20.8349	17.9763	22.3996	23.2678	23.575	22.2033	NaN	20.1756	mRNA surveillance pathway;RNA transport;Spliceosome	7	7	7	39.7	39.7	39.7	26.888	24.429	Q86V81;E9PB61	THO complex subunit 4	ALYREF
19.952	NaN	20.7452	NaN	21.4239	20.9539	20.291	20.5296	20.1984	18.5604	22.1345	21.4167		8	8	8	9.3	9.3	9.3	136.37	24.084	Q86VP6;A0A0C4DGH5;H0YH27	Cullin-associated NEDD8-dissociated protein 1	CAND1
NaN	NaN	19.3129	NaN	18.735	NaN	NaN	18.2478	19.6734	NaN	18.1969	NaN	Systemic lupus erythematosus	4	1	1	52.3	5.4	5.4	13.995	1.8671	Q8IUE6	Histone H2A type 2-B	HIST2H2AB
NaN	NaN	NaN	NaN	NaN	NaN	NaN	NaN	NaN	22.5126	22.1937	NaN		4	4	4	11.6	11.6	11.6	54.705	9.4648	Q8IV08;M0R3G9;M0R1F7	Phospholipase D3	PLD3
21.7216	21.7189	22.8759	17.5141	NaN	NaN	18.6095	20.6624	21.4508	NaN	20.2689	NaN		5	5	5	7.5	7.5	7.5	616.62	8.4412	Q8IVF2	Protein AHNAK2	AHNAK2
NaN	NaN	NaN	NaN	19.1464	21.4154	NaN	18.9797	NaN	NaN	18.2782	18.8045	mRNA surveillance pathway	3	3	3	5.7	5.7	5.7	68.882	5.6755	Q8IYD1;H3BR35;P15170;H3BSV8	Eukaryotic peptide chain release factor GTP-binding subunit ERF3B;Eukaryotic peptide chain release factor GTP-binding subunit ERF3A	GSPT2;GSPT1
NaN	NaN	NaN	NaN	NaN	NaN	NaN	NaN	NaN	17.4939	18.3229	NaN		2	2	2	4	4	4	119.7	1.861	Q8IZL8;I3L1P4;I3L4M7;I3L445;C9JFV4	Proline-, glutamic acid- and leucine-rich protein 1	PELP1
NaN	NaN	NaN	20.2247	NaN	NaN	19.0803	19.8609	20.8963	20.468	NaN	NaN		4	4	4	6	6	6	102.9	7.3889	Q8N163;H0YC69;E5RGU7;E5RFJ3;H0YC58;E5RHJ4	Cell cycle and apoptosis regulator protein 2	CCAR2
NaN	18.7125	NaN	NaN	NaN	NaN	NaN	19.6676	19.6301	17.1162	19.9409	NaN		1	1	1	2.2	2.2	2.2	74.327	8.3262	Q8N442	Translation factor GUF1, mitochondrial	GUF1
NaN	21.5013	NaN	22.9678	20.3783	NaN	NaN	NaN	NaN	23.2121	18.1632	NaN	Protein processing in endoplasmic reticulum	5	5	5	16.9	16.9	16.9	47.628	10.518	Q8NBS9	Thioredoxin domain-containing protein 5	TXNDC5
24.2467	23.9526	23.5877	NaN	18.8563	NaN	18.6083	22.1867	21.9086	18.3847	21.4981	20.9247		5	5	5	18.1	18.1	18.1	44.965	37.521	Q8NC51	Plasminogen activator inhibitor 1 RNA-binding protein	SERBP1
NaN	19.7838	21.1643	NaN	21.013	20.2156	NaN	NaN	NaN	NaN	19.5432	NaN		2	2	2	10.4	10.4	10.4	31.674	3.9456	Q8NCW5;Q5T3I4;Q5T3I3	NAD(P)H-hydrate epimerase	APOA1BP
NaN	18.6086	NaN	NaN	NaN	NaN	NaN	21.7418	19.3574	NaN	NaN	NaN		2	2	2	6.2	6.2	6.2	41.401	2.2649	Q8TDN6	Ribosome biogenesis protein BRX1 homolog	BRIX1
19.759	19.7629	20.6585	NaN	19.9518	20.4397	19.2526	19.5063	19.057	NaN	19.7722	20.3257	Endocytosis	2	2	2	3.9	3.9	3.9	96.022	18.809	Q8WUM4;F8WDK9	Programmed cell death 6-interacting protein	PDCD6IP
NaN	NaN	NaN	20.559	NaN	NaN	19.0507	20.8137	17.6549	21.2413	NaN	19.7274		4	4	4	11.3	11.3	11.3	58.743	10.219	Q8WXF1;X6RDA4	Paraspeckle component 1	PSPC1
19.0717	18.9086	20.3447	19.0407	19.3695	22.5452	19.08	21.0732	19.554	NaN	NaN	21.3817		5	5	5	11.2	11.2	11.2	82.431	20.645	Q92499;F1T0B3;A0A087X2G1	ATP-dependent RNA helicase DDX1	DDX1
NaN	NaN	19.6654	NaN	NaN	19.7855	18.7006	21.2826	NaN	NaN	NaN	NaN		2	2	2	14.5	14.5	14.5	24.68	4.3272	Q92520;C9JP35;C9JMN4	Protein FAM3C	FAM3C
23.2216	23.7405	22.9239	22.0935	21.7244	NaN	20.1846	21.9145	NaN	19.9455	NaN	20.6827	Protein processing in endoplasmic reticulum	12	11	11	19.1	17.5	17.5	96.864	23.517	Q92598;A0A0A0MSM0;R4GN69;D6RJ96;E9PDE8;O95757	Heat shock protein 105 kDa	HSPH1
20.2857	20.2088	19.3307	17.8127	18.7306	20.5303	NaN	NaN	NaN	NaN	19.4498	NaN		6	6	6	3.4	3.4	3.4	292.75	10.483	Q92616	Translational activator GCN1	GCN1L1
NaN	NaN	NaN	NaN	NaN	19.1278	NaN	20.3613	18.2524	20.3776	NaN	NaN	Cell cycle;Chronic myeloid leukemia;Huntington's disease;Notch signaling pathway;Pathways in cancer	4	4	4	11.9	11.9	11.9	55.364	14.579	Q92769;Q5TEE2;Q13547;H3BM24;E7ESJ6;O15379	Histone deacetylase 2;Histone deacetylase 1	HDAC2;HDAC1
19.9557	21.3625	NaN	19.275	NaN	NaN	19.832	20.1182	NaN	NaN	NaN	NaN		4	4	4	8.5	8.5	8.5	102.35	7.8418	Q92973;E7EW37;S4R398	Transportin-1	TNPO1
23.3721	23.4831	23.1745	23.1821	22.3098	NaN	23.9092	24.612	25.163	23.839	19.0784	19.1894		10	10	10	44.6	44.6	44.6	34.93	47.188	Q96AG4;I3L223	Leucine-rich repeat-containing protein 59	LRRC59
18.9623	NaN	21.9685	NaN	NaN	NaN	NaN	NaN	NaN	NaN	NaN	NaN		1	1	1	2	2	2	39.512	1.6037	Q96BY2;Q96PV4	Modulator of apoptosis 1;Paraneoplastic antigen-like protein 5	MOAP1;PNMA5
19.2605	18.888	20.8498	NaN	19.0397	19.7967	18.2215	NaN	NaN	NaN	NaN	20.0658		1	1	1	8.8	8.8	8.8	15.911	13.66	Q96C90	Protein phosphatase 1 regulatory subunit 14B	PPP1R14B
20.1806	21.2294	NaN	19.2704	20.0795	19.9732	19.2389	21.076	21.6574	18.1652	20.8548	NaN		3	3	3	9.4	9.4	9.4	52.623	5.4241	Q96CS3	FAS-associated factor 2	FAF2
19.7496	NaN	20.1429	NaN	17.9879	NaN	NaN	20.0502	20.3943	16.776	19.2645	NaN		3	2	2	6.5	4.9	4.9	61.64	3.2286	Q96I24	Far upstream element-binding protein 3	FUBP3
18.5059	18.382	20.2833	20.6639	19.954	NaN	20.173	20.2054	21.4738	18.0393	18.0539	19.8208		8	8	8	14.6	14.6	14.6	69.491	19.219	Q96PK6;A0A0A6YYI9;F8WDX3;A0A0A0MSL8;B8ZZ74	RNA-binding protein 14	RBM14
NaN	NaN	NaN	NaN	NaN	NaN	NaN	20.5972	NaN	NaN	20.7258	18.1695		3	3	3	5.5	5.5	5.5	91.706	12.656	Q96QK1	Vacuolar protein sorting-associated protein 35	VPS35
NaN	NaN	NaN	NaN	NaN	20.0449	NaN	NaN	NaN	NaN	20.3075	19.5301		4	4	4	9.9	9.9	9.9	84.137	7.2684	Q96TA1	Niban-like protein 1	FAM129B
21.707	NaN	NaN	NaN	19.0804	NaN	NaN	NaN	NaN	NaN	19.4051	20.8626		3	3	3	17.6	17.6	17.6	27.325	4.7827	Q99426;K7EP07;K7EK42	Tubulin-folding cofactor B	TBCB
23.7287	23.8392	24.5293	22.4908	23.3468	21.5985	21.7656	21.9179	21.3753	21.2264	19.3656	23.4536	Parkinson's disease	10	10	10	67.7	67.7	67.7	19.891	42.966	Q99497;K7ELW0;K7EN27	Protein deglycase DJ-1	PARK7
NaN	21.5464	NaN	NaN	NaN	22.5499	20.0858	NaN	21.7116	22.7851	23.5762	22.1823	Ribosome biogenesis in eukaryotes;RNA transport	1	1	1	0.7	0.7	0.7	114.71	1.5867	Q99575	Ribonucleases P/MRP protein subunit POP1	POP1
22.7969	22.1236	22.4195	22.8692	22.0078	23.7439	22.8178	23.6906	23.4948	22.1171	21.8718	22.6418	Alzheimer's disease;Valine, leucine and isoleucine degradation	10	10	10	65.5	65.5	65.5	26.923	60.482	Q99714;Q5H928	3-hydroxyacyl-CoA dehydrogenase type-2	HSD17B10
NaN	20.2128	21.0766	NaN	19.5116	20.1493	NaN	NaN	NaN	16.7554	NaN	NaN		4	4	4	16.3	16.3	16.3	42.823	7.1035	Q99733;A8MXH2;H0YCI4;C9J6D1;C9JZI7;E9PKI2;E9PNW0;E9PJJ2;E9PS34;E9PNJ7;E9PP22	Nucleosome assembly protein 1-like 4	NAP1L4
24.9659	25.0867	25.0705	23.5169	22.8627	22.9924	23.5747	23.7576	23.6391	21.3822	24.285	25.1878		19	19	19	46.6	46.6	46.6	59.366	103.21	Q99832;F8WAM2;F8WBP8;A0A0D9SG95	T-complex protein 1 subunit eta	CCT7
NaN	NaN	NaN	NaN	19.7722	20.185	NaN	NaN	NaN	NaN	NaN	20.7622		2	2	2	8.2	8.2	8.2	54.234	5.4391	Q9BR76;A0A087WW53;F5H390	Coronin-1B;Coronin	CORO1B
NaN	NaN	NaN	NaN	19.5209	NaN	20.8516	21.1872	22.6278	20.2086	20.9873	NaN		6	6	6	7.6	7.6	7.6	122.85	13.047	Q9BSJ8	Extended synaptotagmin-1	ESYT1
NaN	21.7151	NaN	20.69	NaN	NaN	18.1242	NaN	NaN	18.9109	NaN	20.3077		3	3	3	19.4	19.4	19.4	30.692	13.759	Q9BTT0;Q5TB19;E9PLC4;E9PPH5	Acidic leucine-rich nuclear phosphoprotein 32 family member E	ANP32E
24.2728	24.3799	24.8726	19.282	23.7608	24.0737	23.3574	23.1188	20.3491	NaN	22.4072	22.0495	Gap junction;Pathogenic Escherichia coli infection;Phagosome	14	7	7	54.9	31.2	31.2	49.857	54.57	Q9BUF5;K7ESM5;K7EL29;K7EN98;K7ESQ3;K7EQT3;K7EJ64;K7ERA8;K7EJZ4;K7ES63;K7EPE5;CON__ENSEMBL:ENSBTAP00000025008;Q9H4B7	Tubulin beta-6 chain	TUBB6
NaN	NaN	NaN	17.4056	NaN	19.7319	NaN	NaN	NaN	17.6735	18.3857	19.0253		1	1	1	4.7	4.7	4.7	32.662	4.4498	Q9BW60	Elongation of very long chain fatty acids protein 1	ELOVL1
22.808	21.4555	NaN	NaN	20.7542	21.4348	21.5814	NaN	NaN	NaN	20.4299	NaN	Benzoate degradation;Butanoate metabolism;Carbon fixation pathways in prokaryotes;Fatty acid metabolism;Glyoxylate and dicarboxylate metabolism;Lysine degradation;Propanoate metabolism;Pyruvate metabolism;Synthesis and degradation of ketone bodies;Terpenoid backbone biosynthesis;Tryptophan metabolism;Two-component system;Valine, leucine and isoleucine degradation	5	5	5	28	28	28	41.35	13.462	Q9BWD1	Acetyl-CoA acetyltransferase, cytosolic	ACAT2
NaN	NaN	NaN	20.1308	NaN	NaN	17.9232	19.2017	NaN	19.2772	NaN	NaN		3	3	3	9.1	9.1	9.1	40.313	15.076	Q9BWF3;E9PB51;Q9BQ04;E9PLB0;E9PM61;D6R9K7;U3KQD5;J3QRR5	RNA-binding protein 4;RNA-binding protein 4B	RBM4;RBM4B
NaN	NaN	21.7177	22.4913	23.3469	21.3433	NaN	21.0808	NaN	23.6489	21.8108	22.2696		4	4	4	53	53	53	9.6172	12.892	Q9C002;H0YKW5	Normal mucosa of esophagus-specific gene 1 protein	NMES1;C15orf48
21.3301	18.5297	NaN	NaN	18.7401	21.9816	21.1734	21.2193	NaN	NaN	NaN	20.9877		2	2	2	36.4	36.4	36.4	11.25	9.2393	Q9C005	Protein dpy-30 homolog	DPY30
NaN	NaN	NaN	NaN	NaN	18.7825	NaN	19.2732	20.8477	NaN	NaN	NaN		2	2	2	6.8	6.8	6.8	50.646	4.128	Q9H0S4	Probable ATP-dependent RNA helicase DDX47	DDX47
NaN	19.4573	NaN	19.8071	18.3038	NaN	NaN	NaN	NaN	NaN	NaN	NaN	Oxidative phosphorylation	3	3	3	12.9	12.9	12.9	37.92	3.5742	Q9H2U2;D6R967;D6RGV9;H0Y9D8;D6RGI1;D6RAD3	Inorganic pyrophosphatase 2, mitochondrial	PPA2
NaN	NaN	NaN	NaN	NaN	NaN	NaN	20.107	20.1536	NaN	NaN	NaN		2	2	2	8.6	8.6	8.6	31.791	1.8487	Q9H3N1	Thioredoxin-related transmembrane protein 1	TMX1
NaN	NaN	20.3849	NaN	19.1395	20.079	19.486	19.6847	19.4973	NaN	17.1428	NaN		1	1	1	3.8	3.8	3.8	47.145	3.0471	Q9H8Y8	Golgi reassembly-stacking protein 2	GORASP2
20.9979	21.1526	NaN	21.6533	20.4884	NaN	16.3122	NaN	17.6727	21.14	NaN	NaN		5	5	5	24.8	24.8	24.8	35.619	8.7652	Q9H9B4;D6RFI0;S4R2X2;D6RDG7;D6RAE9	Sideroflexin-1	SFXN1
NaN	NaN	NaN	20.5859	18.8865	18.848	NaN	20.9187	NaN	20.8328	NaN	NaN		3	3	3	18	18	18	24.279	7.0035	Q9HAV7	GrpE protein homolog 1, mitochondrial	GRPEL1
20.3645	20.1583	21.9547	NaN	20.3804	NaN	NaN	NaN	19.7227	NaN	NaN	23.669	Wnt signaling pathway	6	6	6	46.5	46.5	46.5	26.21	18.549	Q9HB71;B2ZWH1	Calcyclin-binding protein	CACYBP
NaN	NaN	NaN	NaN	21.995	NaN	NaN	NaN	NaN	NaN	23.2646	20.9436	Inositol phosphate metabolism;Streptomycin biosynthesis	7	7	7	22.9	22.9	22.9	61.067	28.166	Q9NPH2;J3QS51;J3KRH4	Inositol-3-phosphate synthase 1	ISYNA1
NaN	NaN	NaN	21.0599	NaN	NaN	NaN	NaN	NaN	20.801	18.1787	NaN		2	2	2	15.7	15.7	15.7	14.96	7.9596	Q9NPJ3	Acyl-coenzyme A thioesterase 13;Acyl-coenzyme A thioesterase 13, N-terminally processed	ACOT13
NaN	23.2389	NaN	22.6066	NaN	21.3984	NaN	23.7578	21.2655	20.8318	NaN	NaN		9	9	9	18.1	18.1	18.1	87.343	28.319	Q9NR30;A0A087WVC1;Q9BQ39	Nucleolar RNA helicase 2	DDX21
20.2241	22.3849	NaN	20.3299	NaN	NaN	NaN	NaN	NaN	NaN	NaN	NaN	Protein processing in endoplasmic reticulum	3	3	2	34.3	34.3	28.8	22.367	8.5605	Q9NR31;Q5SQT8;X1WI22;D6RAA2;D6RDB2	GTP-binding protein SAR1a	SAR1A
NaN	NaN	NaN	18.8062	NaN	21.5619	21.3695	21.6422	22.1518	20.7492	20.6639	NaN		3	3	3	40.1	40.1	40.1	15.521	9.2499	Q9NS69	Mitochondrial import receptor subunit TOM22 homolog	TOMM22
20.5623	20.4766	18.0184	NaN	17.3783	NaN	NaN	NaN	NaN	NaN	NaN	NaN	Aminoacyl-tRNA biosynthesis	2	2	2	3.4	3.4	3.4	66.115	2.8102	Q9NSD9	Phenylalanine--tRNA ligase beta subunit	FARSB
18.7102	18.7068	NaN	NaN	NaN	NaN	NaN	20.3588	19.3225	NaN	NaN	NaN		2	2	2	4.2	4.2	4.2	75.406	4.0858	Q9NVP1	ATP-dependent RNA helicase DDX18	DDX18
20.6888	21.5726	20.9804	NaN	NaN	NaN	21.008	22.5346	21.6295	NaN	18.842	NaN		1	1	1	6.6	6.6	6.6	43.614	4.1274	Q9NX58	Cell growth-regulating nucleolar protein	LYAR
NaN	NaN	NaN	NaN	20.4917	19.5392	NaN	NaN	NaN	NaN	NaN	NaN		1	1	1	0.2	0.2	0.2	329.48	1.5456	Q9NYQ6	Cadherin EGF LAG seven-pass G-type receptor 1	CELSR1
18.5606	20.4134	NaN	20.7968	21.8923	21.8494	20.559	21.3109	21.4922	17.7895	19.4857	NaN	Protein processing in endoplasmic reticulum	11	11	11	12.1	12.1	12.1	177.19	19.783	Q9NYU2;H7BZG0	UDP-glucose:glycoprotein glucosyltransferase 1	UGGT1
22.5482	22.8261	22.004	NaN	16.6164	NaN	21.4256	21.3822	21.6501	NaN	22.0929	NaN		4	4	2	9.2	9.2	5.2	63.48	8.7928	Q9NZI8	Insulin-like growth factor 2 mRNA-binding protein 1	IGF2BP1
NaN	NaN	NaN	19.5614	18.9291	NaN	20.035	21.2046	20.4805	17.0178	NaN	NaN		6	6	6	4.5	4.5	4.5	234.71	7.4245	Q9NZM1;H0YD14	Myoferlin	MYOF
22.6697	21.9422	22.0885	20.2937	20.8787	NaN	19.9999	20.9917	21.9875	19.9098	NaN	NaN	Tight junction	4	4	4	19.3	19.3	19.3	27.893	10.947	Q9P0L0;J3QKM9;E5RK64;O95292	Vesicle-associated membrane protein-associated protein A	VAPA
22.0728	22.2184	22.447	18.7486	20.1084	NaN	NaN	20.1367	NaN	18.0808	21.7571	NaN		2	2	2	35.8	35.8	35.8	9.0564	18.347	Q9P1F3;Q5SZC9	Costars family protein ABRACL	ABRACL
NaN	NaN	NaN	NaN	NaN	NaN	NaN	NaN	NaN	20.0739	21.9625	NaN	Chemokine signaling pathway;MAPK signaling pathway;Regulation of actin cytoskeleton	1	1	1	22.2	22.2	22.2	8.0061	2.5942	Q9UBI6	Guanine nucleotide-binding protein G(I)/G(S)/G(O) subunit gamma-12	GNG12
21.6057	22.6217	21.7216	NaN	20.7507	NaN	21.2701	21.2717	NaN	NaN	NaN	20.8647	Ubiquitin mediated proteolysis	3	3	3	8.1	8.1	8.1	71.223	8.9204	Q9UBT2;U3KQ93;U3KQ55;K7ES38;K7EPL2	SUMO-activating enzyme subunit 2	UBA2
18.486	NaN	NaN	NaN	20.8755	20.0518	20.6454	21.7691	22.411	20.5247	19.8445	18.7967		5	5	5	12	12	12	74.175	14.127	Q9UJS0;O75746	Calcium-binding mitochondrial carrier protein Aralar2	SLC25A13
21.1676	22.7216	22.418	21.0526	21.1057	22.0092	20.505	23.085	22.5533	21.6058	22.3042	21.9805		5	5	5	29.2	29.2	29.2	38.534	26.149	Q9UJZ1;A0A087WYB4	Stomatin-like protein 2, mitochondrial	STOML2
NaN	20.6421	21.1953	NaN	NaN	NaN	NaN	NaN	19.746	NaN	NaN	NaN	RNA degradation;Spliceosome	1	1	1	24.3	24.3	24.3	11.602	4.6198	Q9UK45	U6 snRNA-associated Sm-like protein LSm7	LSM7
NaN	NaN	NaN	NaN	18.4868	22.5406	NaN	NaN	NaN	NaN	NaN	NaN		1	1	1	1.1	1.1	1.1	121.04	1.6399	Q9ULE4	Protein FAM184B	FAM184B
NaN	22.6516	NaN	NaN	19.903	NaN	19.5846	23.4604	23.43	20.9731	20.1323	20.7311	Spliceosome;Ubiquitin mediated proteolysis	5	5	5	23.8	23.8	23.8	55.18	22.183	Q9UMS4;F5GY56	Pre-mRNA-processing factor 19	PRPF19
19.2098	NaN	18.0952	NaN	18.6992	NaN	NaN	NaN	NaN	NaN	18.4693	NaN		1	1	1	4.9	4.9	4.9	15.857	1.2533	X6RI15;Q9UNY4	Transcription termination factor 2	TTF2
23.1569	23.0445	21.8628	20.222	18.8124	18.1012	21.0169	23.099	22.4047	20.7813	22.9904	21.2772		7	7	7	24.1	24.1	24.1	43.786	18.919	Q9UQ80;F8W0A3;F8VR77;H0YIN7	Proliferation-associated protein 2G4	PA2G4
NaN	NaN	NaN	NaN	NaN	NaN	21.0269	NaN	20.8317	NaN	NaN	NaN		2	2	2	21.7	21.7	21.7	20.462	2.2488	Q9Y221;J3QRD6;J3QRR4;J3QLW7	60S ribosome subunit biogenesis protein NIP7 homolog	NIP7
19.7496	19.5224	20.6434	NaN	19.8469	NaN	NaN	NaN	NaN	18.7331	18.7634	19.6532		3	3	3	20.1	20.1	20.1	28.068	12.534	Q9Y224;H0YJB9;G3V4C6	UPF0568 protein C14orf166	C14orf166
18.0343	17.282	16.8091	19.7385	NaN	20.5905	NaN	NaN	NaN	20.097	16.8368	20.9632		5	5	5	13.8	13.8	13.8	51.156	13.914	Q9Y230;X6R2L4;M0R0Y3;M0QXI6;M0QXZ7;M0R0Z0	RuvB-like 2	RUVBL2
19.5668	19.6605	20.3229	18.2821	NaN	NaN	NaN	NaN	NaN	NaN	18.9871	NaN	Protein processing in endoplasmic reticulum	1	1	1	2.1	2.1	2.1	87.156	2.5178	Q9Y263	Phospholipase A-2-activating protein	PLAA
22.3799	21.4986	21.7854	21.5199	21.3951	23.9901	21.7054	21.2602	NaN	21.5769	NaN	21.6158	Wnt signaling pathway	9	9	9	30.7	30.7	30.7	50.227	19.158	Q9Y265;E7ETR0;H7C4G5;H7C4I3;J3QLR1	RuvB-like 1	RUVBL1
21.0387	21.57	23.3806	NaN	20.8163	23.0776	NaN	17.0745	19.2867	NaN	19.827	20.8749		4	4	4	22.4	22.4	22.4	38.242	12.421	Q9Y266;A0A0A0MSS4;A0A0A0MSU9	Nuclear migration protein nudC	NUDC
NaN	21.7869	22.4745	NaN	NaN	NaN	NaN	20.6577	21.9688	21.1843	21.9978	NaN	Calcium signaling pathway;Huntington's disease;Parkinson's disease	2	2	2	8.5	8.5	8.5	30.658	9.6369	Q9Y277;E5RK27;E5RFP6;E5RJN6;E5RHZ6	Voltage-dependent anion-selective channel protein 3	VDAC3
20.8258	19.8048	NaN	NaN	NaN	NaN	NaN	NaN	NaN	17.6617	NaN	NaN		1	1	1	3.8	3.8	3.8	40.542	3.9554	Q9Y295	Developmentally-regulated GTP-binding protein 1	DRG1
19.3123	18.6773	NaN	18.729	NaN	NaN	NaN	19.4402	19.3574	18.2301	NaN	17.5561		2	2	2	2.3	2.3	2.3	108.66	9.479	Q9Y2W1	Thyroid hormone receptor-associated protein 3	THRAP3
19.8579	NaN	NaN	16.6718	18.8687	NaN	18.6136	20.5513	20.8711	16.3196	19.658	20.7609	Ribosome biogenesis in eukaryotes	3	3	3	9.5	9.5	9.5	59.578	11.665	Q9Y2X3;H7BZ72	Nucleolar protein 58	NOP58
21.8985	20.9326	21.362	NaN	NaN	NaN	NaN	NaN	NaN	NaN	NaN	NaN	NOD-like receptor signaling pathway;Plant-pathogen interaction	2	2	2	10.4	10.4	10.4	41.024	4.4843	Q9Y2Z0	Suppressor of G2 allele of SKP1 homolog	SUGT1
20.4685	NaN	20.7584	NaN	NaN	NaN	NaN	NaN	NaN	NaN	NaN	NaN		1	1	1	8.4	8.4	8.4	21.188	1.7874	Q9Y3C1	Nucleolar protein 16	NOP16
18.3817	20.0175	20.4576	21.4249	19.7072	20.6034	NaN	NaN	16.7273	19.6465	20.6797	22.0704	RNA transport	6	6	6	22	22	22	38.438	34.833	Q9Y3F4;H0YH33	Serine-threonine kinase receptor-associated protein	STRAP
23.1531	23.3354	23.1054	18.8039	23.7239	23.0371	18.8563	20.7046	NaN	15.8685	23.5814	20.3302	Focal adhesion	23	23	23	17.4	17.4	17.4	269.76	83.305	Q9Y490;H0YMT1;Q9Y4G6	Talin-1	TLN1
NaN	NaN	NaN	19.9309	18.7478	NaN	20.821	21.6438	21.5276	20.3607	NaN	NaN		1	1	1	14.7	14.7	14.7	10.5	6.5422	Q9Y5L4	Mitochondrial import inner membrane translocase subunit Tim13	TIMM13
19.0083	NaN	NaN	NaN	NaN	NaN	NaN	20.7163	21.0981	NaN	NaN	NaN	mRNA surveillance pathway;RNA transport;Spliceosome	2	2	2	28.7	28.7	28.7	19.889	2.5895	Q9Y5S9	RNA-binding protein 8A	RBM8A
18.6212	20.2233	21.3061	17.9924	NaN	NaN	19.8342	NaN	18.9507	18.4974	23.1293	20.8161	Glycine, serine and threonine metabolism;Methane metabolism;Vitamin B6 metabolism	7	7	7	25.4	25.4	25.4	40.422	19.944	Q9Y617	Phosphoserine aminotransferase	PSAT1
NaN	19.2378	NaN	NaN	20.2498	NaN	NaN	NaN	NaN	NaN	18.3425	14.8596		4	4	3	7.4	7.4	6.1	97.717	9.272	Q9Y678;H0Y8X7	Coatomer subunit gamma-1	COPG1
20.182	20.643	21.1888	17.9403	19.7885	NaN	NaN	NaN	NaN	NaN	19.7529	21.9959		1	1	1	9.1	9.1	9.1	28.772	2.2531	Q9Y696	Chloride intracellular channel protein 4	CLIC4
NaN	NaN	NaN	20.273	18.2602	NaN	NaN	NaN	NaN	NaN	NaN	NaN		2	2	2	6.7	6.7	6.7	49.96	7.3652	Q9Y6N5;H3BNP9;H3BNX3	Sulfide:quinone oxidoreductase, mitochondrial	SQRDL
