# Supplementary material for: Co-occurring KRAS mutation/LKB1 loss in non-small cell lung cancer cells results in enhanced metabolic activity susceptible to caloric restriction: an in vitro integrated multilevel approach
Source: J Exp Clin Cancer Res. 2018 Dec 4;37:302. doi: 10.1186/s13046-018-0954-5 (PMC6280460; doi:10.1186/s13046-018-0954-5)
Supplement: Supplementary file 6 — Table S5. Protein functional annotation. (XLSX 20 kb) [file 13046_2018_954_MOESM6_ESM.xlsx]

## Sheet: K vs WT
PANTHER GO-Slim Biological Process	Homo sapiens (REF)	Experimental	expected	Fold Enrichment	P value	log10 P value
cellular component organization or biogenesis	1724	46	14.06	3.27	1.01e-10	9.99568
protein metabolic process	2062	48	16.81	2.85	3.57e-09	8.44733
protein folding	130	12	1.06	11.32	2.75e-07	6.56067
protein complex assembly	166	13	1.35	9.6	3.88e-07	6.41117
protein complex biogenesis	167	13	1.36	9.55	4.17e-07	6.37986
chromosome segregation	123	11	1	10.97	1.9e-06	5.72125
cellular component organization	1584	36	12.92	2.79	4.31e-06	5.36552
cellular component morphogenesis	545	20	4.44	4.5	6.51e-06	5.18642
mitosis	372	16	3.03	5.27	2.14e-05	4.66959
cell cycle	901	24	7.35	3.27	9.27e-05	4.03292
primary metabolic process	5773	77	47.07	1.64	0.00018	3.74473
cellular component biogenesis	493	16	4.02	3.98	0.000829	3.08145
intracellular protein transport	1025	24	8.36	2.87	0.000866	3.06248
protein transport	1048	24	8.55	2.81	0.00126	2.89963
cellular component movement	413	13	3.37	3.86	0.00964	2.01592
transport	1948	33	15.88	2.08	0.0105	1.97881
tRNA aminoacylation for protein translation	47	5	0.38	13.05	0.0115	1.9393
ferredoxin metabolic process	9	3	0.07	40.88	0.0148	1.82974
cellular amino acid metabolic process	261	10	2.13	4.7	0.0157	1.8041
translation	323	11	2.63	4.18	0.0193	1.71444
Most overrepresented Biological process	log2 Fold change
cellular component organization or biogenesis	Kvs WT
P07737	1.03398
P40227	1.10593
P50990	1.06499
P34932	1.09151
P27816	only K
Q15021	1.60541
P50454	only K
P50991	1.20554
P12270	only K
Q14204	1.07318
P22695	-3.38013
Q9BQE3	3.25347
P68363	1.07574
Q16643	1.12058
P60709	1.03548
Q9UNM6	only K
P07437	1.09465
P38646	1.03832
P68371	1.04936
Q15691	1.7225
Q15185	1.68031
Q15942	1.07037
P15311	1.09684
P78371	1.07878
O60493	only K
Q92598	1.66004
P02545	1.0652
Q99880	1.06235
P67936	1.60715
Q71U36	1.08491
Q9Y490	1.75915
Q3ZCM7	1.03607
P12814	1.75807
P43686	1.70536
O43707	1.07526
P49368	1.10669
P61163	3.1309
P33176	only K
P52907	1.64574
P08708	1.02907
P17987	1.0653
P68133	1.05656
Q13509	1.637
P30050	1.05632
Q9BUF5	1.10026
P04350	1.72762
protein metabolic process
P40227	1.10593
Q9Y2Z0	only K
Q96FW1	only K
P50990	1.06499
O00232	only K
P68036	1.0963
P17655	only K
P54136	1.69253
P50991	1.20554
P62937	1.08327
P26640	only K
P22061	only K
P27824	1.03985
O14980	1.07103
P22695	-3.38013
P31948	1.09875
P04844	only WT
P00390	only K
Q9UNM6	only K
P51665	1.60018
Q15185	1.68031
P31930	only WT
P84098	3.52448
P78371	1.07878
P61956	1.65733
Q9BT78	only K
Q9UBT2	1.55022
Q15369	only K
P09622	only K
O43776	3.25425
P62979	1.69711
O15355	only K
P43686	1.70536
P49368	1.10669
P60842	1.08228
P41250	only K
Q16881	1.12028
Q13200	1.06415
Q9NSD9	only K
P05388	1.0557
Q02790	1.66714
P08708	1.02907
P17987	1.0653
Q05639	only K
P39656	only WT
P30050	1.05632
P08238	1.08783
Q9HB71	3.1678
protein folding
P40227	1.10593
Q9Y2Z0	only K
P50990	1.06499
P50991	1.20554
P27824	1.03985
P31948	1.09875
Q15185	1.68031
P78371	1.07878
P49368	1.10669
Q02790	1.66714
P17987	1.0653
P08238	1.08783
ferredoxin metabolic process
P00390	only K
P09622	only WT
Q16881	1.12028

## Sheet: S vs WT
PANTHER GO-Slim Biological Process	Homo sapiens (REF)	Experimental	expected	Fold Enrichment	P value	log10 P value
RNA splicing, via transesterification reactions	134	7	0.2	24.45	0.000448	3.34872
mRNA splicing, via spliceosome	174	7	0.27	18.83	0.00158	2.80134
mRNA processing	242	5	0.37	13.54	0.00766	2.11577
Most overrepresented Biological process	log2 Fold change
	S vs WT
RNA splicing via tranesterification
O75494	-3.11426
Q96AE4	-3.73294
Q15637	-1.602
Q15393	-1.02606
P63162	only WT
P62995	-1.66175
Q16629	3.35554
RNA splicing via spliceosome
O75494	-3.11426
Q96AE4	-3.73294
Q15637	-1.602
Q15393	-1.02606
P63162	only WT
P62995	-1.66175
Q16629	3.35554

## Sheet: KS vs WT
PANTHER GO-Slim Biological Process	Homo sapiens (REF)	Experimental	expected	Fold Enrichment	P value	log10 P value
cellular component organization or biogenesis	1724	7	3.62	5.81	1.21e-09	8.91721
nucleobase-containing compound metabolic process	3160	12	6.63	3.77	4.94e-08	7.30627
primary metabolic process	5773	18	12.11	2.56	9.63e-07	6.01637
metabolic process	6817	19	14.3	2.24	1.32e-05	4.87943
Most overrepresented Biological process	log2 Fold change
	KS vs WT
cellular component organization or biogenesis
P62805	-1.83979
P55209	-1.0969
P16949	only KS
O96008	-1.56755
O75533	-1.64718
P20700	-1.09482
P60981	-3.02928
nucleobase-containing compound metabolic process
P62805	-1.83979
P55209	-1.0969
P62826	1.04585
P31939	3.43927
Q12905	-1.12075
O75533	-1.64718
Q7KZF4	only KS
P62136	-1.05197
Q12849	only in WT
P49588	only KS
P35637	-1.13606
O95299	only in WT
