# Supplementary material for: Co-occurring KRAS mutation/LKB1 loss in non-small cell lung cancer cells results in enhanced metabolic activity susceptible to caloric restriction: an in vitro integrated multilevel approach
Source: J Exp Clin Cancer Res. 2018 Dec 4;37:302. doi: 10.1186/s13046-018-0954-5 (PMC6280460; doi:10.1186/s13046-018-0954-5)
Supplement: Supplementary file 7 — Table S6. Fold-changes in abundance of metabolic enzymes. (XLSX 21 kb) [file 13046_2018_954_MOESM7_ESM.xlsx]

## Sheet: Legend
R: fold change of abundance in each biological replicate. The number refers to biological replicates
Proteins were colored based on metabolic pathway. Color legend is provided in each sheet

## Sheet: K vs WT
	Fold change
	K vs WT
Gene name	R1	R2	R3
TALDO1	4.25018	2.05109	1.66901
ALDOA	3.89197	2.0444	3.61339
GAPDH	5.03752	3.45069	4.33612
PGK1	2.13263	2.96837	1.96815		Color legend
PKM	5.51292	4.31846	2.90876		glycolysis
PGAM1	3.28747	2.45924	2.0698		TCA
IDH2	2.19635	1.6461	1.53824		glutaminolysis
GOT1	2.91528	1.75457	2.17851		urea cycle
GLS	4.07803	1.94819	2.98307		glutatione metabolism
GLUL	5.28791	2.40935	1.90224		tryptophan metabolism
OTC	2.69207	2.87258	2.32643		amino acid degradation
ASL	3.40734	2.54013	1.96025		purine metabolism
GSS	3.65942	1.64399	1.11331		fatty acid transport and oxidation
GSR	6.13073	3.81033	4.72378		lipid metabolism
IDO2	2.22798	1.20258	2.05585
KYNU	4.43753	2.23717	1.66128
AUH	6.38756	3.6175	3.49081
FTCD	2.19687	1.72768	1.83681
GMPS	3.77345	2.53944	3.76507
ATIC	3.39954	1.82859	1.71507
FASN	3.20984	2.58824	1.8117
SCD5	1.15887	1.14058	2.55626
ALOX5	2.30121	1.18744	2.32181

## Sheet: S vs WT
	Fold change
	S vs WT
Gene name	R1	R2	R3
TALDO1	4.35005	3.88083	1.71399
ALDOA	5.89024	3.69284	2.87669
GAPDH	6.77181	3.34425	3.53182
PGK1	4.44559	3.16652	2.44851		Color legend
PGAM1	3.70399	4.3972	2.67505		glycolysis
PKM	6.24958	4.41481	2.96218		TCA
LDHA	5.60491	4.28579	3.62153		glutaminolysis
PDHA1	2.95037	1.92748	1.01726		urea cycle
SUCLG1	1.75585	2.21452	1.4086		glutatione metabolism
GOT1	6.02947	5.53955	4.13152		tryptophan metabolism
GLS	4.95481	2.10487	2.24524		amino acid degradation
GLUL	3.31936	1.79402	1.08759		purine metabolism
OTC	4.41177	3.45316	1.95589		fatty acid transport and oxidation
ASL	1.70912	3.17278	2.04777		lipid metabolism
GSR	2.12677	2.94096	2.26627
IDO2	2.88293	1.61289	1.61221
KYNU	3.96458	1.76433	1.65114
AUH	2.57513	3.61114	3.41546
FTCD	1.73447	1.78789	1.74763
GMPS	3.8574	4.10999	3.44851
ATIC	4.60561	2.97915	2.35084
FASN	2.64817	4.15284	1.96793
SCD5	1.60153	2.7167	2.99657
ALOX5	2.04035	1.53516	3.39929

## Sheet: KS vs WT
	Fold change
	KS vs WT
Gene name	R1	R2	R3
TALDO1	4.88722	3.64107	2.46787
ALDOA	5.80485	5.35893	4.32697			Color legend
GAPDH	4.56725	4.76373	6.73625			glycolysis
PGK1	1.60001	1.83833	2.14988			TCA
PKM	8.07573	6.00728	4.30952			glutaminolysis
LDHA	4.76066	3.18998	2.98654			urea cycle
PGAM1	2.20227	4.26036	2.34296			glutatione metabolism
GOT1	5.69321	8.58366	2.80217			tryptophan metabolism
GLS	4.85796	3.39805	3.9977			amino acid degradation
GLS2	3.53874	4.76651	1.25089			purine metabolism
OTC	1.62119	3.57615	3.14655			fatty acid transport and oxidation
IDO2	2.7872	1.9903	1.93208			lipid metabolism
KYNU	3.01078	1.37631	1.35125
AUH	1.74105	3.17526	3.88038
FTCD	3.76589	1.46873	2.29453
CSAD	-1.67107	-1.53368	-1.36545
GMPS	2.24086	2.25144	3.30468
ATIC	4.78177	3.52394	1.88007
FASN	3.47882	3.06323	2.33152
SCD5	2.17767	3.51053	3.05333
ALOX5	1.50838	1.9659	2.4933

## Sheet: KS vs K
	Fold change
	KS vs K
Gene name	R1	R2	R3
TALDO1	1.14989	1.40736	1.47864		Color legend
ALDOA	1.49149	2.62128	1.19748		glycolysis
PKM	1.46488	1.39107	1.48157		TCA
IDH2	-2.27477	-1.90162	-1.05901		glutaminolysis
GOT1	1.95288	4.89216	1.28628		urea cycle
GLUL	-2.484	-1.76061	-1.79423		glutatione metabolism
IDO2	1.251	1.65502	1.10001		tryptophan metabolism
KYNU	-1.47388	-1.62549	-1.22944		amino acid degradation
GCDH	1.43583	1.4461	1.37655		purine metabolism
ODC1	-2.17979	-1.51333	-2.86978		fatty acid transport and oxidation
ATIC	1.40659	1.92714	1.09621		lipid metabolism
ACADVL	1.58538	1.55643	2.27442
PISD	3.5402	3.66251	1.96108

## Sheet:  KS vs S
	Fold change
	KS vs S
Gene name	R1	R2	R3			Color legend
PKM	1.2922	1.49288	2.37912			glycolysis
MDH2	-5.17811	-1.74791	-1.89873			TCA
GLUL	-1.55927	-1.31096	-1.02584			glutaminolysis
KYNU	-1.3168	-1.0992	-1.22194			urea cycle
PAH	-1.15034	-1.81499	-1.21756			glutatione metabolism
ACAA1	-1.38348	-1.91774	-1.09962			tryptophan metabolism
ODC1	-1.80123	-1.65078	-1.02836			amino acid degradation
PGS1	1.0886	1.33138	1.25427			purine metabolism
